# Supplementary material for: Fine-tuning of substrate preferences of the Src-family kinase Lck revealed through a high-throughput specificity screen
Source: eLife. 2018 Mar 16;7:e35190. doi: 10.7554/eLife.35190 (PMC5889215; doi:10.7554/eLife.35190)
Supplement: Figure 2—source data 1. — The reported values are the average of enrichment scores from all replicates with the specified kinase. In addition, peptide names and sequences are given. Peptide names correspond to the Uniprot identifier (The UniProt Consortium, 2017) followed by the residue number for the central tyrosine. [file elife-35190-fig2-data1.xlsx]

## Sheet: Sheet1
Name	Sequence	c-Src WT	c-Src Q420E	c-Src R469P	c-Src P485E	Lck	c-Abl	ZAP-70
1433E_HUMAN_131	MKGDYHRYLAEFATG	0.163804	0.300385	0.274068	0.289526	0.168326	1.48781	0.182899
1433E_HUMAN_131_YA	MKGDAHRYLAEFATG	0.132881	0.229103	0.192993	0.214221	0.159723	0.224482	0.157925
1433G_HUMAN_133	MKGDYYRYLAEVATG	0.191532	0.205841	0.286823	0.561938	0.137982	1.40695	0.329085
1433G_HUMAN_133_YA	MKGDAARYLAEVATG	0.171189	0.257356	0.228979	0.251462	0.159305	0.152554	0.224823
1A01_HUMAN_344	SDRKGGSYTQAASSD	0.15043	0.170538	0.195311	0.216457	0.134441	0.130509	0.156911
1A80_HUMAN_344	SVRKGGSYSQAASSD	0.124727	0.188185	0.234409	0.178217	0.111663	0.145161	0.144431
2ABB_HUMAN_295	KFSHSGRYIMTRDYL	0.387029	0.295468	0.755532	0.487606	0.78629	0.487443	0.518955
2ABB_HUMAN_295_YA	KFSHSGRYIMTRDAL	0.458	0.203963	0.396947	0.247455	0.683651	0.444761	0.255534
2ABD_HUMAN_305	KFSHSGRYMMTRDYL	0.28759	0.161809	0.405664	0.226598	0.401291	0.379322	0.309845
2ABD_HUMAN_305_YA	KFSHSGRYMMTRDAL	0.352803	0.171714	0.401666	0.301472	0.746268	0.837162	0.25374
3BP2_HUMAN_174	YPTDNEDYEHDDEDD	0.176041	0.976602	0.247543	0.229958	0.138506	0.158409	0.298061
3BP2_HUMAN_174_YA	APTDNEDYEHDDEDD	0.149683	0.204509	0.296059	0.22078	0.104627	0.116117	0.168337
3BP2_HUMAN_448	GDDSDEDYEKVPLPN	0.237926	0.0350789	0.0144862	0.0346242	0.221101	0.137881	5.03384
41_HUMAN_222	SLLDDTVYECVVEKH	3.2987	2.76843	2.94898	2.38199	3.55549	3.01216	4.91848
A17_VAR67_203	NSLNTDDYGGGGGGG	0.159461	0.405412	0.215379	0.188697	0.135464	0.141374	0.167049
A36_VAR67_112	APSTEHIYDSVAGST	3.56127	2.67197	2.47293	2.54275	4.47688	4.13716	1.19269
A36_VAR67_132	DCNEQTIYQNTTVIN	2.97915	2.59062	3.42289	3.4536	3.47355	3.27334	0.361185
A4_HUMAN_497	VFNMLKKYVRAEQKD	0.116057	0.19036	0.251775	0.19651	0.167938	0.117928	0.188331
A4_HUMAN_757	SKMQQNGYENPTYKF	0.128738	0.127227	0.138366	0.139995	0.140225	0.350519	0.225812
A4_HUMAN_757_YA	SKMQQNGYENPTAKF	0.158193	0.138496	0.230148	0.22378	0.134537	0.171229	0.209326
AAK1_HUMAN_234	APEMVNLYSGKIITT	0.796654	1.94161	1.99881	1.65009	3.26391	0.46756	0.16881
AATM_HUMAN_96	AKNLDKEYLPIGGLA	0.253557	0.322418	0.532566	0.400759	0.280545	1.34922	1.61903
ABCB7_HUMAN_340	AIDSLLNYETVKYFN	1.33552	1.7465	1.43886	1.81294	1.55123	0.506203	3.10508
ABCB7_HUMAN_340_YA	AIDSLLNYETVKAFN	0.196973	0.424318	0.403417	0.379204	0.541423	0.175837	2.89095
ABI1_HUMAN_455	IEKVVAIYDYTKDKD	2.50367	1.99167	2.86345	2.43559	3.62518	3.00482	0.250586
ABI1_HUMAN_455_YA	IEKVVAIYDATKDKD	0.313603	0.481114	1.16019	0.732263	0.944873	0.521164	0.185251
ABI1_HUMAN_53	ALEETKAYTTQSLAS	0.136666	0.212414	0.16547	0.260174	0.120902	0.119938	0.187026
ABL1_HUMAN_128	SLEKHSWYHGPVSRN	0.138412	0.235687	0.237332	0.264527	0.120211	0.143531	0.149308
ABL1_HUMAN_139	VSRNAAEYLLSSGIN	0.251231	0.482846	0.295798	0.424373	0.197155	0.483464	0.263061
ABL1_HUMAN_185	TASDGKLYVSSESRF	0.151576	0.202742	0.902605	0.126711	0.151383	0.254272	0.18681
ABL1_HUMAN_215	GLITTLHYPAPKRNK	0.184431	0.181193	0.189199	0.171227	0.232044	0.134352	0.159748
ABL1_HUMAN_226	KRNKPTVYGVSPNYD	2.78887	2.20821	2.95893	2.51606	2.90259	2.78928	0.339126
ABL1_HUMAN_226_YA	KRNKPTVYGVSPNAD	1.53003	1.08615	1.8893	3.19781	0.789142	0.557265	0.134728
ABL1_HUMAN_257	GGQYGEVYEGVWKKY	3.68877	2.6717	2.5846	2.28775	4.60413	1.57281	0.645478
ABL1_HUMAN_257_YA	GGQAGEVYEGVWKKA	2.65695	6.93583	2.03697	2.57862	3.68917	0.209855	0.187663
ABL1_HUMAN_413	TAPESLAYNKFSIKS	0.171776	0.280444	0.277128	0.341472	0.106831	0.138843	0.196461
ABL2_HUMAN_139	EKLRVLGYNQNGEWS	0.126285	0.172645	0.203574	0.252871	0.148352	0.125176	0.202949
ABL2_HUMAN_174	SLEKHSWYHGPVSRS	0.14785	0.182131	0.154105	0.212692	0.138708	0.184416	0.155296
ABL2_HUMAN_185	VSRSAAEYLLSSLIN	0.205745	0.252855	0.251495	0.359424	0.127276	0.698575	0.270033
ABL2_HUMAN_231	TTADGKVYVTAESRF	0.128393	0.169018	0.388032	0.202583	0.148904	0.133453	0.155653
ABL2_HUMAN_261	GLVTTLHYPAPKCNK	0.156667	0.246731	0.170403	0.256599	0.192272	0.199007	0.216523
ABL2_HUMAN_272	KCNKPTVYGVSPIHD	2.36445	1.86187	2.65536	2.39165	1.82138	3.31133	0.211571
ABL2_HUMAN_303	GGQYGEVYVGVWKKY	2.78256	3.36864	3.15409	2.75514	3.34171	2.56838	0.208471
ABL2_HUMAN_303_YA	GGQAGEVYVGVWKKA	0.914862	2.14686	2.2894	1.37299	2.7696	0.420916	0.182469
ABL2_HUMAN_459	TAPESLAYNTFSIKS	1.01561	3.01334	1.85613	1.75092	0.646769	2.4018	0.242756
ABL2_HUMAN_568	SSSSVVPYLPRLPIL	0.198266	0.260824	0.249978	0.260891	0.133401	0.130847	0.149178
ABL2_HUMAN_683	ENQPHKKYELTGNFS	0.36143	0.15912	0.198895	0.193799	0.124972	0.121494	0.153012
ABL2_HUMAN_718	NLVPPKCYGGSFAQR	0.158544	1.02437	0.313971	0.331701	0.22668	0.222612	0.273889
ABLM1_HUMAN_373	GSPGHTIYAKVDNEI	2.09695	1.76372	2.85517	2.49487	2.39797	3.18372	0.183434
ABLM1_HUMAN_396	IPKVKAIYDIERPDL	2.34104	2.40776	1.27683	2.63467	0.810155	0.131057	0.260163
ACBG1_HUMAN_658	EKKDEAVYQAIEEGI	3.38772	2.30045	4.5465	2.49774	3.66283	3.17721	2.39714
ACBP_HUMAN_29	DEEMLFIYGHYKQAT	3.00144	1.87122	2.1747	2.30826	3.31842	2.23745	0.379869
ACBP_HUMAN_29_YA	DEEMLFIYGHAKQAT	2.64847	1.26044	1.67981	1.35789	3.1308	2.45863	0.246122
ACD11_HUMAN_324	AGIAQGVYSRYLLGN	2.97018	3.73835	2.63289	3.01231	3.10998	3.45627	0.205092
ACD11_HUMAN_324_YA	AGIAQGVYSRALLGN	0.79953	0.568875	0.728694	0.492719	1.67241	2.764	0.191684
ACHB_HUMAN_390	WGRGTDEYFIRKPPS	0.610928	1.21462	0.818958	0.830372	1.19632	1.36247	1.17535
ACHD_HUMAN_390	YISKAEEYFLLKSRS	0.160389	0.496652	0.347329	0.246254	0.345332	1.04016	0.810146
ACHD_HUMAN_390_YA	AISKAEEYFLLKSRS	0.126563	0.250502	0.254621	0.111203	0.180213	0.189457	0.415703
ACK1_HUMAN_518	GGVKKPTYDPVSEDQ	0.138252	0.158346	0.742876	0.2281	0.107103	0.167531	0.170975
ACK1_HUMAN_827	SFASDPKYATPQVIQ	0.158271	0.214993	0.23111	0.271626	0.144461	3.00263	0.151592
ACK1_HUMAN_859	KKVSSTHYYLLPERP	0.37231	0.258783	0.530846	0.43501	1.01911	2.0593	2.60281
ACK1_HUMAN_859_YA	KKVSSTHYALLPERP	0.215201	0.265511	0.375296	0.337592	1.59688	3.39539	0.287642
ACLY_HUMAN_131	YATREGDYVLFHHEG	2.99869	2.40417	2.30221	2.45954	2.95605	3.14078	5.11664
ACLY_HUMAN_131_YA	AATREGDYVLFHHEG	3.23121	3.30531	2.4382	3.44053	1.65629	3.00389	4.89381
ACLY_HUMAN_682	SRTTDGVYEGVAIGG	3.42562	3.32704	5.06943	3.09156	3.97565	0.678928	0.367179
ACSL1_HUMAN_84	DSDEPLVYFYDDVTT	2.39154	1.26675	0.559962	1.31123	0.527281	0.174765	2.65722
ACSL1_HUMAN_84_YA	DSDEPLVYFADDVTT	0.579539	0.494543	0.340051	0.944897	0.168701	0.101434	0.346662
ACTN1_HUMAN_12	DSQQTNDYMQPEEDW	0.150048	0.206244	0.223518	0.294804	0.13636	0.826555	3.49049
ACTR2_HUMAN_202	KLLLLRGYAFNHSAD	0.137324	0.329309	0.192587	0.174465	0.10751	0.0994827	0.307514
ACVL1_HUMAN_361	MHSQGSDYLDIGNNP	0.160128	0.203883	0.152648	0.316443	0.181201	0.53981	3.98693
ADH1B_HUMAN_35	EVAPPKAYEVRIKMV	0.179963	0.19477	0.172134	0.893793	0.212759	0.182228	0.346475
ADK_HUMAN_77	VKKFKVEYHAGGSTQ	0.163526	0.228072	0.222785	0.156851	0.266282	0.178727	0.215714
ADRB2_HUMAN_141	AITSPFKYQSLLTKN	0.111963	0.115076	0.215667	0.245206	0.215393	0.136258	0.130259
ADRBK1_HUMAN_13	AVLADVSYLMAMEKS	0.124962	0.158664	0.286066	0.323721	0.163978	0.13449	0.144267
ADRBK1_HUMAN_86	ARPLVEFYEEIKKYE	4.51328	2.43711	2.3781	2.41448	4.80613	0.557458	2.93685
ADRBK1_HUMAN_86_YA	ARPLVEFYEEIKKAE	1.9177	1.87552	1.97191	1.84531	4.04325	0.195605	2.106
ADRBK1_HUMAN_92	FYEEIKKYEKLETEE	0.939794	1.08171	1.26821	7.85676	2.72063	0.0664194	0.535292
ADSV_HUMAN_599	SLGGKKDYQTSPLLE	0.105006	0.239842	0.206586	0.133358	0.130802	0.0884087	0.183995
AF1L2_HUMAN_413	DPSPDHLYSFRILHK	2.40871	1.89481	1.93697	1.85878	3.66984	0.679022	0.248851
AF1L2_HUMAN_56	SSDEEYIYMNKVTIN	3.2944	2.03217	3.19821	2.60123	3.54694	2.72679	4.39767
AF1L2_HUMAN_56_YA	SSDEEAIYMNKVTIN	3.79504	3.41001	5.26782	2.58912	3.73132	3.15073	0.480909
AFAP1_HUMAN_125	MSSSYESYDEEEEDG	0.131276	0.147053	0.163489	0.150476	0.184259	0.141772	0.21273
AFAP1_HUMAN_125_YA	MSSSAESYDEEEEDG	0.161356	0.189862	0.19962	0.211449	0.159362	0.12638	0.182395
AFAP1_HUMAN_451	TDPEALHYDYIDVEM	2.73561	1.39564	0.987858	1.80885	2.60886	2.35927	6.58394
AFAP1_HUMAN_451_YA	TDPEALHYDAIDVEM	1.74546	1.07064	1.05232	1.74815	0.184622	0.384765	0.662885
AFAP1_HUMAN_93	TSSLPEGYYEEAVPL	0.947242	0.38233	0.318071	0.964807	0.520567	0.134359	3.01306
AFAP1_HUMAN_93_YA	TSSLPEGYAEEAVPL	0.136354	0.280339	0.217827	0.293313	0.0864165	0.141699	0.242829
AFAP1_HUMAN_94	SSLPEGYYEEAVPLS	1.17926	0.636694	0.421412	0.856312	0.557056	0.134812	2.57082
AFAP1_HUMAN_94_YA	SSLPEGAYEEAVPLS	0.179177	0.29484	0.284925	0.314238	0.156056	0.145162	1.9787
AFAP1L2_HUMAN_54	SSSSDEEYIYMNKVT	3.47366	2.66601	2.92947	2.68713	2.97464	2.74771	4.87701
AFAP1L2_HUMAN_54_YA	SSSSDEEYIAMNKVT	0.230795	0.521345	0.50449	0.323364	0.175783	0.555498	4.19944
AGO2_HUMAN_393	ASFNTDPYVREFGIM	0.109902	0.190003	0.21821	0.189222	0.105075	0.121282	0.196676
AGRB2_HUMAN_1351	EPGSEGDYMVLPRRT	3.61645	3.46919	3.00905	2.67423	4.17368	4.16943	5.63347
AGTR1_HUMAN_319	YFLQLLKYIPPKAKS	0.33923	0.197558	0.158363	0.230034	0.523487	0.216752	0.495252
AGTR1_HUMAN_319_YA	AFLQLLKYIPPKAKS	0.200956	0.194938	0.355569	0.23529	0.259995	0.325209	0.377297
AKA12_HUMAN_374	EPRLSAEYEKVELPS	0.163086	0.352638	0.343161	0.271471	0.135448	0.184124	2.27373
AKAP3_HUMAN_404	AQDKAESYSLISMKG	0.12859	0.300725	0.254269	0.345369	0.16005	0.100717	0.200584
AKAP4_HUMAN_303	GGQKSFLYSELSNKS	1.3746	5.08688	1.64192	1.38115	3.425	1.36831	0.205323
AKAP8_HUMAN_146	CLPEHNPYRPSYSYD	0.217897	0.187132	0.244952	0.223686	0.151149	0.647	0.216201
AKAP8_HUMAN_146_YA	CLPEHNPYRPSASAD	0.160455	0.122102	0.124121	0.161035	0.194357	0.22016	0.303732
AKAP8_HUMAN_170	NGSFGGQYSECRDPA	0.146115	0.361747	3.2031	0.292452	0.225552	0.163875	0.272535
AKAP8_HUMAN_311	KRKQFQLYEEPDTKL	0.127039	0.183717	0.192662	0.331848	0.227532	0.78756	0.222721
AKAP8_HUMAN_436	TVEFLQEYIVNRNKK	0.212353	0.191831	0.349529	0.239704	0.120334	0.107672	0.180033
AKAP8_HUMAN_51	SVTTGATYSYGPASW	1.61014	1.27559	1.58339	1.54003	0.942394	2.95172	0.267642
AKAP8_HUMAN_51_YA	SVTTGATYSAGPASW	1.80465	1.97989	3.22566	2.10708	1.22262	3.46544	0.162916
AKAP8_HUMAN_53	TTGATYSYGPASWEA	1.96986	1.9716	2.38951	2.77551	0.484439	3.25255	0.250073
AKAP8_HUMAN_539	IVKMLEKYLKGEDPF	0.259182	0.214146	0.270676	0.186336	0.314886	0.13953	0.226155
AKT1_HUMAN_176	EKATGRYYAMKILKK	0.397907	0.367374	0.57445	0.512209	0.864359	0.572546	0.261886
AKT1_HUMAN_176_YA	EKATGRAYAMKILKK	0.195372	0.203432	0.317271	0.143567	0.328119	0.272904	0.285449
AKT1_HUMAN_315	TFCGTPEYLAPEVLE	0.167943	0.192729	0.159448	0.263093	0.164805	3.22772	2.16334
AKT1_HUMAN_326	EVLEDNDYGRAVDWW	2.61228	2.31872	1.75523	2.51033	1.00361	1.06104	6.05883
AKT2_HUMAN_178	EKATGRYYAMKILRK	0.311962	0.171981	0.352711	0.180757	0.529509	0.391632	0.21104
AKT2_HUMAN_178_YA	EKATGRAYAMKILRK	0.177929	0.183459	0.247695	0.268397	0.382873	0.162468	0.203644
AKT2_HUMAN_475	THFPQFSYSASIREG	0.124574	0.348436	0.18917	0.246254	0.132326	0.135425	0.126762
AL1A2_HUMAN_168	TIPVDGDYFTFTRHE	3.02951	2.39116	2.51226	2.25776	3.06997	2.84304	3.22361
ALDOA_HUMAN_5	GGGMPYQYPALTPEQ	0.147752	0.233184	0.192423	0.226548	0.144432	0.173423	0.246348
ALDOA_HUMAN_5_YA	GGGMPAQYPALTPEQ	0.120892	0.282846	0.189233	0.246631	0.121205	0.11301	0.170709
ALK_HUMAN_1078	MELQSPEYKLSKLRT	0.135991	0.205039	0.131673	0.129141	0.140384	0.106282	0.182578
ALK_HUMAN_1092	TSTIMTDYNPNYCFA	0.191533	0.202501	0.36379	0.23365	0.123864	0.259888	1.75763
ALK_HUMAN_1092_YA	TSTIMTDYNPNACFA	0.145567	0.170797	0.292668	0.257964	0.142405	0.108151	0.125602
ALK_HUMAN_1096	MTDYNPNYCFAGKTS	0.196262	0.193695	0.341178	0.365107	0.194175	0.49113	1.30543
ALK_HUMAN_1096_YA	MTDANPNYCFAGKTS	0.158634	0.196354	0.246798	0.233834	0.124887	0.148939	0.891989
ALK_HUMAN_1278	FGMARDIYRASYYRK	0.103323	0.314541	0.219588	0.154389	0.274066	0.505745	0.161528
ALK_HUMAN_1278_YA	FGMARDIYRASAARK	0.0938214	0.162096	0.0985743	0.127292	0.142078	0.63561	0.16711
ALK_HUMAN_1283	DIYRASYYRKGGCAM	0.19226	0.348029	0.385902	0.282828	0.273731	0.357082	0.158824
ALK_HUMAN_1283_YA	DIARASAYRKGGCAM	0.178712	0.274055	0.346072	0.356867	0.153406	0.122245	0.272086
ALK_HUMAN_1507	TSLWNPTYGSWFTEK	2.61842	2.16572	2.98741	2.80521	3.28132	0.945711	0.19294
ALK_HUMAN_1604	TAPGAGHYEDTILKS	0.128613	1.38633	0.289016	0.368611	0.0922284	0.157585	0.20672
ALKB5_HUMAN_71	SDPERSDYEEQQLQK	0.116086	0.191682	0.155077	0.213641	0.163991	0.156066	0.477671
AMOL2_HUMAN_107	KGEELPTYEEAKAHS	0.495809	0.450032	0.790442	0.953127	0.977335	0.746403	0.975841
AMPD1_HUMAN_249	KMKDGVVYVYPNEAA	0.213385	0.226267	0.307725	0.321893	0.176393	2.05172	0.308131
AMPD1_HUMAN_249_YA	KMKDGVVYVAPNEAA	0.178747	0.305013	0.322023	0.288068	0.770139	2.95804	0.161726
AMPD2_HUMAN_145	SELRSAPYEFPEESP	0.170604	0.252477	0.328735	0.274202	0.0926146	0.107225	1.58989
ANC2_HUMAN_810	VRDQQLVYSAGVYRL	3.42578	3.51481	2.87407	2.89343	3.57985	3.62155	0.180758
ANC2_HUMAN_810_YA	VRDQQLVYSAGVARL	2.57736	4.11685	3.10706	3.37485	2.71432	2.79923	0.163218
ANDR_HUMAN_309	STEDTAEYSPFKGGY	3.26981	2.66926	2.49353	2.63884	3.51609	3.15544	3.23575
ANDR_HUMAN_309_YA	STEDTAEYSPFKGGA	2.47537	2.43774	2.63181	2.13114	3.26375	2.33148	1.31233
ANDR_HUMAN_359	ALDEAAAYQSRDYYN	1.79231	2.05025	1.82369	1.9348	1.8578	2.95095	0.563473
ANDR_HUMAN_359_YA	ALDEAAAYQSRDAAN	0.136263	0.556873	0.252726	0.274189	0.14579	0.198741	0.164414
ANDR_HUMAN_364	AAYQSRDYYNFPLAL	3.55504	2.79038	3.04475	3.74261	3.31572	3.60349	4.88122
ANDR_HUMAN_364_YA	AAAQSRDYANFPLAL	1.83515	2.19009	2.30268	2.01116	0.741608	2.92388	0.407609
ANDR_HUMAN_365	AYQSRDYYNFPLALA	2.96237	2.60182	2.77197	2.66238	2.59164	3.25053	4.99211
ANDR_HUMAN_365_YA	AAQSRDAYNFPLALA	0.150215	0.310876	0.267714	0.213587	0.138406	0.194877	0.228457
ANDR_HUMAN_395	KLENPLDYGSAWAAA	0.150126	0.218729	0.265604	0.21342	0.142939	0.172693	0.210912
ANDR_HUMAN_535	MDSYSGPYGDMRLET	2.95112	2.61968	2.47344	2.6376	0.95053	0.205481	0.200426
ANDR_HUMAN_535_YA	MDSASGPYGDMRLET	2.21756	2.68123	2.53696	2.51427	0.26874	0.136201	0.159862
ANDR_HUMAN_552	DHVLPIDYYFPPQKT	0.234968	0.302732	0.383061	0.286988	0.314012	3.12522	5.48768
ANDR_HUMAN_552_YA	DHVLPIDYAFPPQKT	0.122214	0.163418	0.19094	0.172831	0.112873	2.68058	4.31843
ANDR_HUMAN_916	SGKVKPIYFHTQGGG	0.389586	0.275763	0.395441	0.221517	0.536327	1.1352	0.187801
ANK1_HUMAN_1073	MSRLCQDYDTIGPEG	1.72166	1.15218	1.34005	1.37295	2.30564	0.866003	3.53261
ANK2_HUMAN_1382	VLEGKPIYVDCFGNL	1.13639	0.556816	1.25836	1.42012	0.36737	2.24185	0.450029
ANK2_HUMAN_378	VAAHCGHYRVTKLLL	0.399576	0.33119	0.383391	0.291551	0.426228	0.72924	0.562204
ANK2_HUMAN_531	DAATTNGYTPLHISA	0.13219	0.308854	0.221354	0.235163	0.114484	0.108215	0.205804
ANKK1_HUMAN_178	EQSTRMQYIERSALR	0.13746	0.279527	0.302118	0.237836	0.133804	0.152671	0.165152
ANLN_HUMAN_671	SEDRDLLYSIDAYRS	3.53551	3.24668	2.75842	3.72665	3.22285	0.437741	0.395631
ANLN_HUMAN_671_YA	SEDRDLLYSIDAARS	3.51292	2.7753	2.84567	3.29508	2.83936	0.184092	0.296934
ANR11_HUMAN_1850	FACLSPGYYSPDYGL	0.289395	0.414488	0.323123	0.619916	0.220957	0.783201	0.568217
ANR11_HUMAN_1850_YA	FACLSPGYASPDAGL	0.151617	0.325795	0.314334	0.333672	0.161243	0.956022	0.267905
ANR11_HUMAN_1851	ACLSPGYYSPDYGLP	0.265127	0.51239	0.412243	0.442887	0.320986	2.82167	3.3553
ANR11_HUMAN_1851_YA	ACLSPGAYSPDAGLP	0.127056	0.426268	0.23779	0.298427	0.146096	0.0981366	0.154379
ANS1B_HUMAN_901	DSIELGDYTKAFLIN	0.134923	0.193064	0.177372	0.17059	0.143894	0.319229	2.53961
ANXA1_HUMAN_21	IENEEQEYVQTVKSS	0.187576	0.184831	0.238502	0.190105	0.126254	0.118309	2.03707
ANXA2_HUMAN_199	DQDARDLYDAGVKRK	1.14274	2.00397	2.3985	1.91022	3.08515	0.178575	0.182307
ANXA6_HUMAN_201	TDEAQFIYILGNRSK	3.05392	1.66508	5.75466	2.03704	3.56707	0.545771	0.180576
ANXA6_HUMAN_30	NQDAEALYTAMKGFG	3.19435	2.91825	3.06962	2.86256	3.41624	3.15347	4.51553
AP2B1_HUMAN_737	THRQGHIYMEMNFTN	2.34335	0.801153	0.977783	0.874593	3.42682	2.17035	0.700277
APBB1_HUMAN_547	VQKFQVYYLGNVPVA	0.28533	0.377023	0.4987	0.376529	0.483665	0.187341	0.458372
APBB1_HUMAN_547_YA	VQKFQVAYLGNVPVA	0.170404	0.33959	0.291009	0.342208	0.155916	0.35542	0.175639
APC1_HUMAN_571	SKLHDSLYNEDCTFQ	2.00674	1.20228	1.95931	2.10886	1.17495	0.139951	0.213508
APT_HUMAN_60	THGGRIDYIAGLDSR	0.113581	0.224327	0.383169	0.168786	0.142029	0.134905	0.174334
AQP1_HUMAN_253	TSGQVEEYDLDADDI	0.202922	0.33676	0.320491	0.221474	0.160541	0.131961	0.226912
ARAF_HUMAN_302	GYRDSGYYWEVPPSE	2.30052	2.03505	2.46741	2.4562	2.59988	0.259515	4.77891
ARAF_HUMAN_302_YA	GARDSGAYWEVPPSE	2.1945	2.47574	2.68499	2.47657	0.791433	0.212573	4.58082
ARAP1_HUMAN_504	SFDLTTPYRIFSFSA	0.14728	0.651701	0.346767	0.340242	0.15077	0.784494	0.197885
ARAP2_HUMAN_77	KMQDIPIYANVHKTK	3.80572	2.3887	3.23609	2.95985	6.78602	3.88854	0.214685
ARAP3_HUMAN_1403	EELEEPVYEEPVYEE	3.34545	2.0403	4.11746	1.80552	3.22928	2.35283	4.57716
ARAP3_HUMAN_1403_YA	EELEEPVYEEPVAEE	1.44717	0.568846	0.375046	0.69191	1.29561	1.45253	3.54106
ARGAL_HUMAN_131	ALEEDVIYDDVPCES	2.51651	1.54219	2.31504	1.15834	2.35802	1.82128	4.19826
ARGAL_HUMAN_152	GAERNLLYEDAHRAG	1.85901	1.94846	0.906208	1.88472	2.16094	0.533383	0.240933
ARHG1_HUMAN_738	WDQEAQIYELVAQTV	3.23006	2.17267	2.32401	1.9111	3.61443	2.96999	4.86758
ARHGAP5_HUMAN_1109	KGYSDEIYVVPDDSQ	3.36438	3.37256	2.1036	1.88717	3.13178	3.20024	4.9032
ARHGAP5_HUMAN_1109_YA	KGASDEIYVVPDDSQ	2.40694	2.11445	1.31626	1.77134	1.93805	2.55407	4.28129
ARHGAP5_HUMAN_306	NHPDYEEYINLEGTR	3.30383	1.85964	2.23744	1.35828	2.34175	2.69956	5.75108
ARHGAP5_HUMAN_306_YA	NHPDAEEYINLEGTR	0.265312	0.321411	0.335738	0.244034	0.14714	0.434869	4.60777
ARHGDIA_HUMAN_156	YGPRAEEYEFLTPVE	1.86685	1.45168	0.958104	1.4849	0.580523	1.81929	5.09327
ARHGDIA_HUMAN_156_YA	AGPRAEEYEFLTPVE	0.893351	0.72307	0.400131	0.876507	0.302588	0.967286	4.43865
ARHGDIA_HUMAN_27	EDEHSVNYKPPAQKS	0.132304	0.298966	0.204208	0.230043	0.127757	0.114787	0.139123
ARHGDIB_HUMAN_153	YGPRPEEYEFLTPVE	0.605941	0.623659	0.294155	0.646517	0.312803	1.41805	4.68627
ARHGDIB_HUMAN_153_YA	AGPRPEEYEFLTPVE	0.26339	0.237776	0.159762	0.344908	0.143048	0.564376	4.10142
ARPC3_HUMAN_47	DIVDEAIYYFKANVF	3.0018	2.34426	2.75857	4.0712	3.36531	2.49059	3.19133
ARPC3_HUMAN_47_YA	DIVDEAIYAFKANVF	3.10061	2.62175	2.43183	2.26113	3.45803	3.0887	0.701987
ARRB1_HUMAN_47	VVLVDPEYLKERRVY	0.155251	0.185972	0.207434	0.216984	0.127066	0.106966	0.143633
ARRB1_HUMAN_47_YA	VVLVDPEYLKERRVA	0.228516	0.52998	0.146225	0.177915	0.1297	0.149367	0.197816
ARRB2_HUMAN_48	VVLVDPDYLKDRKVF	0.0890283	0.0351637	0.0367462	0.023864	0.0983232	0.0880072	0.133463
ASAP3_HUMAN_34	FAAKMPRYRGAALAR	0.162344	0.456053	0.256218	0.285552	0.174156	0.155767	0.218392
ASSY_HUMAN_113	AQREGAKYVSHGATG	0.135633	0.322564	0.130618	0.239765	0.0973328	0.118499	0.205499
ASSY_HUMAN_87	SALYEDRYLLGTSLA	3.39351	3.5961	2.522	2.56542	3.50934	1.08219	0.22867
ASSY_HUMAN_87_YA	SALAEDRYLLGTSLA	0.144078	0.256991	0.206332	0.160065	0.10545	0.102947	0.160819
AT1A1_HUMAN_10	KGVGRDKYEPAAVSE	0.136456	0.26195	0.182703	0.250567	0.122994	0.128583	0.147788
AT1A1_HUMAN_260	TARGIVVYTGDRTVM	0.15989	0.194735	0.160663	0.200526	0.181462	0.140102	0.220914
AT1A1_HUMAN_542	KDAFQNAYLELGGLG	2.06786	1.48366	1.74008	2.03157	0.563709	1.06669	0.273693
AT1B1_HUMAN_101	DPKSYEAYVLNIVRF	0.313684	0.517571	0.378692	0.493665	0.18914	0.313087	0.260599
AT1B1_HUMAN_101_YA	DPKSAEAYVLNIVRF	0.177211	0.240492	0.43439	0.265791	0.151364	0.147822	0.443216
ATG2B_HUMAN_1012	AFKSAVHYDEESGSE	0.146681	0.229809	0.178062	0.161148	0.119328	0.109874	0.154892
ATM_HUMAN_370	SLEISQSYTTTQRES	0.140996	0.290501	0.179323	0.177994	0.12541	0.117127	0.14375
ATP4A_HUMAN_10	KAENYELYSVELGPG	3.40209	2.96829	2.68908	2.85499	2.15127	0.543296	3.61387
ATP4A_HUMAN_10_YA	KAENAELYSVELGPG	2.67673	2.74386	2.36777	3.01391	0.829195	0.121711	0.246946
ATP4A_HUMAN_7	GMGKAENYELYSVEL	3.20092	2.43987	2.40883	2.41488	1.98043	0.37744	3.59231
ATP4A_HUMAN_7_YA	GMGKAENYELASVEL	0.124332	0.17834	0.144631	0.184248	0.165807	0.233072	0.236495
ATR_HUMAN_291	DTDQLKLYEEPLSKL	1.09907	0.843849	0.772696	1.34756	2.27462	2.72882	0.91597
ATR_HUMAN_310	FPFEAEAYRNIEPVY	3.45391	4.3619	3.26839	3.33544	3.45078	2.96185	0.23856
ATR_HUMAN_310_YA	FPFEAEAYRNIEPVA	0.123074	0.0738203	0.130886	0.0844748	0.172089	0.693928	0.161484
ATRX_HUMAN_1063	KKDELSDYAEKSTGK	0.129082	0.167275	0.303678	0.283827	0.145994	0.10559	0.210833
ATRX_HUMAN_89	KPSIVTKYVESDDEK	0.163034	0.177071	0.16518	0.300933	0.172879	0.167187	0.156706
ATX2L_HUMAN_118	SPVFEGVYNNSRMLH	2.54684	2.27397	2.13702	2.08076	3.17793	1.26334	0.154626
ATX2L_HUMAN_264	FKFNEENYGVKTTYD	0.22577	0.542166	0.293626	0.387567	0.303539	0.140624	0.16955
ATX2L_HUMAN_264_YA	FKFNEENYGVKTTAD	0.160834	0.349014	0.228796	0.191531	0.243835	0.158776	0.219751
ATX2L_HUMAN_309	EIESSPQYRLRIAME	0.165339	0.195321	0.215178	0.213584	0.180407	0.140929	0.685839
ATXN2L_HUMAN_744	VPGQQGKYRGAKGSL	0.168062	0.303712	0.262978	0.317668	0.307205	0.14014	0.146571
AURKA_HUMAN_148	KGKFGNVYLAREKQS	0.671574	0.509371	0.700948	0.546665	1.36503	0.382081	0.245864
AVIL_HUMAN_758	SNDSEPKYYPIAVLL	0.447397	0.251451	0.221803	0.205557	0.69671	1.47758	1.16992
AVIL_HUMAN_758_YA	SNDSEPKYAPIAVLL	0.259644	0.269956	0.289311	0.50394	1.60303	2.01	0.272277
AVIL_HUMAN_85	YTTQLDDYLGGSPVQ	0.16137	0.225465	0.149214	0.203649	0.111276	0.12132	0.367911
AVIL_HUMAN_85_YA	ATTQLDDYLGGSPVQ	0.107296	0.300808	0.125919	0.219316	0.143039	0.110227	0.227129
AXA2L_HUMAN_199	DQDAQDLYDAGVKRK	2.0955	2.40966	2.38438	2.13034	3.19605	0.222175	0.214838
B3AT_HUMAN_21	ENLEQEEYEDPDIPE	0.123622	0.196124	0.183264	0.163955	0.118271	0.178913	3.46376
B3AT_HUMAN_359	AKPDSSFYKGLDLNG	0.191561	0.172877	0.341665	0.309898	0.147433	0.125087	0.205303
B3AT_HUMAN_46	TEATATDYHTTSHPG	0.108176	0.095752	0.115327	0.0953938	0.138864	0.255755	0.187467
B3AT_HUMAN_8	MEELQDDYEDMMEEN	0.183301	0.217439	0.246248	0.186022	0.187726	0.170348	4.39626
B3AT_HUMAN_904	EEEGRDEYDEVAMPV	0.663709	0.353037	0.313213	0.419196	0.15981	0.122789	3.80806
BBC3_HUMAN_152	ADDLNAQYERRRQEE	0.187184	0.199602	0.215013	0.21342	0.136551	0.117981	0.190162
BCAP_HUMAN_263	CETVISYYTDMEEIG	0.274932	0.264166	0.22814	0.363938	0.115269	0.188484	1.34158
BCAP_HUMAN_263_YA	CETVISAYTDMEEIG	0.243966	0.150836	0.236429	0.119039	0.363846	0.206933	0.880529
BCAP_HUMAN_419	GEEADAVYESMAHLS	3.50355	3.02488	2.9473	3.1107	3.718	3.42509	5.1611
BCAP_HUMAN_594	DRPQSSIYDPFAGMK	3.32555	2.71171	2.99377	2.60992	3.78708	0.32103	0.193911
BCAP_HUMAN_694	AKVEFGVYESGPRKS	3.042	2.03577	2.07802	1.98309	3.92043	0.682223	0.200854
BCAR1_HUMAN_12	NVLAKALYDNVAESP	0.267598	0.274118	0.399849	0.541663	0.439789	0.0974366	0.181383
BCAR1_HUMAN_128	SKAQQGLYQVPGPSP	0.19749	0.230826	0.226708	0.251818	1.21347	3.01088	0.352738
BCAR1_HUMAN_234	AQPEQDEYDIPRHLL	3.07746	2.43425	2.18769	1.48555	3.58702	3.33709	4.86949
BCAR1_HUMAN_249	APGPQDIYDVPPVRG	6.83278	3.41915	3.03449	2.95077	3.15757	2.92216	4.26348
BCAR1_HUMAN_362	SPPAEDVYDVPPPAP	3.77409	4.29094	3.17434	2.49463	4.44694	4.16415	5.09869
BCAR1_HUMAN_410	GVVDSGVYAVPPPAE	2.81077	3.75033	2.6692	2.94893	2.74516	2.5296	4.08486
BCAR1_HUMAN_664	EGGWMEDYDYVHLQG	3.27582	3.27284	2.90052	3.00595	3.48246	2.91213	4.42675
BCAR1_HUMAN_664_YA	EGGWMEDYDAVHLQG	2.8671	3.05505	2.5888	2.10433	1.83548	0.362085	4.59455
BCLAF1_HUMAN_150	SSRSSSPYSKSPVSK	0.106535	0.250561	0.224119	0.253448	0.147953	1.6309	0.182848
BCLAF1_HUMAN_408	DTEETEDYRQFRKSV	0.134864	0.593306	0.250209	0.236435	0.154787	1.40812	0.232616
BCLAF1_HUMAN_93	GRYHRGGYRPVWNRR	0.136133	0.316362	0.208967	0.231905	0.109594	0.16065	0.226345
BCLAF1_HUMAN_93_YA	GRAHRGGYRPVWNRR	0.12854	0.259611	0.183976	0.239402	0.146304	0.162608	0.166668
BCLF1_HUMAN_219	IWPGLSAYDNSPRSP	0.08904	0.316718	0.601456	0.259565	0.140248	0.145083	0.152857
BCLF1_HUMAN_284	VGNGSSRYSPSQNSP	0.173945	0.272836	0.279453	0.300182	0.316221	0.144519	0.148217
BCLF1_HUMAN_383	EDQEALDYFSDKESG	0.125133	0.174088	0.312441	0.224091	0.160546	0.13198	1.50269
BCR_HUMAN_177	ADAEKPFYVNVEFHH	0.197451	0.154814	0.187002	0.178568	0.338975	0.230591	0.582389
BCR_HUMAN_246	SCGVDGDYEDAELNP	0.168494	0.228197	0.196163	0.198218	0.177498	0.13497	4.71157
BCR_HUMAN_283	YQPYQSIYVGGMMEG	3.72075	2.60863	2.68524	2.53497	3.95879	3.90923	1.68613
BCR_HUMAN_283_YA	AQPAQSIYVGGMMEG	2.03994	1.69596	2.20129	2.28257	0.533787	1.85941	0.191489
BCR_HUMAN_328	FEDCGGGYTPDCSSN	0.133459	0.234444	0.192471	0.329166	0.157048	0.110028	0.22245
BCR_HUMAN_360	VSPSPTTYRMFRDKS	0.137497	0.177906	0.221343	0.260004	0.129612	0.1201	0.173415
BCR_HUMAN_554	FFKVPELYEIHKEFY	1.81647	0.983189	1.28763	2.69225	1.6927	0.710059	0.601047
BCR_HUMAN_554_YA	FFKVPELYEIHKEFA	1.45937	1.55806	0.970518	1.9619	1.5861	0.380554	0.36545
BCR_HUMAN_644	NSLETLLYKPVDRVT	0.163092	0.189488	0.252927	0.210944	0.192358	1.37987	0.325254
BCS1_HUMAN_181	SEWRPFGYPRRRRPL	0.330801	0.136196	0.150978	0.226339	0.144937	0.16048	0.165352
BDKRB2_HUMAN_177	GVRWAKLYSLVIWGC	0.17919	0.345244	0.723113	0.264776	0.29034	0.193333	0.490992
BECN1_HUMAN_233	EAQYQREYSEFKRQQ	3.17863	4.74103	2.69049	2.79861	3.36048	3.00211	0.224498
BECN1_HUMAN_233_YA	EAQAQREYSEFKRQQ	1.62109	2.53979	2.5075	2.15878	1.71345	2.06624	0.220929
BECN1_HUMAN_352	KSKELPLYCSGGLRF	0.775551	0.873863	1.2501	1.15882	2.35538	3.13568	0.35863
BKRB2_HUMAN_156	MLVSIDRYLALVKTM	0.198053	0.236735	0.301904	0.260821	0.201954	0.166348	0.629643
BLK_HUMAN_389	ARIIDSEYTAQEGAK	0.273424	0.411652	0.240098	0.465968	0.141225	0.104361	0.180635
BLNK_HUMAN_189	VEDNDENYIHPTESS	0.108889	0.156922	0.242046	0.146133	0.109403	0.0831951	3.74868
BLNK_HUMAN_72	SDDFDSDYENPDEHS	0.130938	0.207552	0.227147	0.316517	0.121402	0.10158	4.69683
BLNK_HUMAN_84	EHSDSEMYVMPAEEN	0.870639	0.509797	0.273343	0.460227	0.167353	0.121729	2.83236
BLNK_HUMAN_96	EENADDSYEPPPVEQ	0.146124	0.227663	0.286517	0.230792	0.140211	0.235352	4.45355
BLVRA_HUMAN_198	EERKEDQYMKMTVCL	0.210446	0.192101	0.226377	0.194921	0.340031	0.219396	0.604557
BLVRA_HUMAN_72	SQEVEVAYICSESSS	0.224699	0.243316	0.169136	0.283097	0.15923	0.220682	0.322864
BLVRA_HUMAN_83	ESSSHEDYIRQFLNA	0.128886	0.13812	0.249535	0.252543	0.123628	0.0945459	0.264374
BMX_HUMAN_216	SSTSLAQYDSNSKKI	0.112989	0.213965	0.226827	0.16886	0.161416	0.207284	0.171466
BMX_HUMAN_224	DSNSKKIYGSQPNFN	0.609968	0.539868	1.36319	0.882553	0.457968	0.463524	0.553869
BOP1_HUMAN_122	SARIGDEYAEDSSDE	0.127218	0.121353	0.280723	0.162232	0.111137	0.118627	0.14662
BORG2_HUMAN_63	ISFLQGNYELLPGNQ	0.535824	0.343923	0.39122	0.481035	1.78957	2.62445	3.58887
BTK_HUMAN_344	CSTPQSQYYLAEKHL	0.214485	0.329402	0.347231	0.236481	0.208994	0.282015	0.29534
BTK_HUMAN_344_YA	CSTPQSQYALAEKHL	0.207241	0.207137	0.232397	0.197981	0.209951	0.789413	0.238491
BTK_HUMAN_361	TIPELINYHQHNSAG	0.112722	0.146757	0.0983292	1.37422	0.103182	0.14703	0.127943
BTK_HUMAN_40	TVHKLSYYEYDFERG	1.52094	1.36944	0.430026	1.66425	0.237168	0.177723	0.209739
BTK_HUMAN_40_YA	TVHKLSAYEADFERG	0.118901	0.189123	0.153882	0.244806	0.179961	0.182805	0.173175
BTK_HUMAN_617	IAQGLRLYRPHLASE	0.160269	0.286117	0.24736	0.207754	0.138527	0.13895	0.214436
BUB3_HUMAN_207	EGRVAVEYLDPSPEV	0.119999	0.105588	0.139323	0.119675	0.141868	0.766021	0.475605
BUD13_HUMAN_494	DSERDELYAQWGKGL	3.597	2.79251	2.749	2.9812	4.26305	3.76726	3.54495
C1QBP_HUMAN_188	ALVLDCHYPEDEVGQ	0.201508	0.318465	0.307667	0.311706	0.165263	0.162988	0.295645
C1QR1_HUMAN_644	SRAMENQYSPTPGTD	0.162821	0.1654	0.278136	0.313277	0.120847	0.483712	0.676961
CA052_HUMAN_132	AIKWSNIYEDNGDDA	2.44251	1.79204	0.733195	1.46833	0.171103	0.163603	0.169787
CA2D3_HUMAN_924	AHGLLDPYNAFLSAV	1.14173	1.00353	1.21632	1.14515	0.275867	0.137596	0.180064
CACNA1C_HUMAN_2217	ELQDSRVYVSSLGGG	1.21328	1.02915	0.909501	1.2104	0.35705	0.849951	0.147593
CADH1_HUMAN_753	DDTRDNVYYYDEEGG	2.92765	2.64352	2.20002	2.83931	1.80157	0.168143	2.35017
CADH1_HUMAN_753_YA	DDTRDNVYAADEEGG	1.77059	1.15818	0.972426	1.45038	0.421529	0.134803	0.247591
CADH1_HUMAN_754	DTRDNVYYYDEEGGG	2.91977	2.42572	2.11457	2.17352	2.70829	0.170685	2.16894
CADH1_HUMAN_754_YA	DTRDNVAYADEEGGG	0.138087	0.200426	0.273014	0.210513	0.14219	0.108136	0.191495
CADH1_HUMAN_755	TRDNVYYYDEEGGGE	3.51371	2.37331	1.44412	2.05935	1.66306	0.155098	0.815235
CADH1_HUMAN_755_YA	TRDNVAAYDEEGGGE	0.129058	0.349645	0.152029	0.168149	0.157827	0.236227	0.182646
CAH9_HUMAN_449	GTKGGVSYRPAEVAE	0.134972	0.281005	0.231205	0.168942	0.140043	0.135847	0.185129
CALB2_HUMAN_214	YDKDRSGYIDEHELD	0.13919	0.173899	0.235518	0.174458	0.136785	0.124826	0.203323
CALB2_HUMAN_214_YA	ADKDRSGYIDEHELD	0.169402	0.18398	0.288153	0.149569	0.145402	0.0924632	0.337269
CALM_HUMAN_100	FDKDGNGYISAAELR	0.272022	1.10569	0.197007	0.583489	0.11354	2.2185	0.162977
CALM_HUMAN_139	DGDGQVNYEEFVQMM	2.54625	1.7046	0.805535	1.67196	0.576961	1.65872	4.76366
CALU_HUMAN_47	NDAQSFDYDHDAFLG	0.188478	0.188124	0.254956	0.330675	0.158095	0.156186	0.332496
CAMP1_HUMAN_1537	YPDTEEIYKLTGTGP	3.50645	3.95385	2.03521	3.13507	4.16395	4.25317	2.58796
CAMP1_HUMAN_1537_YA	APDTEEIYKLTGTGP	4.67188	2.76239	2.69744	2.64571	4.86287	3.79208	1.34322
CANB1_HUMAN_106	YDMDKDGYISNGELF	0.939551	0.713753	0.364817	1.02862	0.208879	1.18596	0.18341
CANB1_HUMAN_106_YA	ADMDKDGYISNGELF	0.212189	0.273295	0.312263	0.481892	0.157665	0.305453	0.167004
CAP1_HUMAN_31	TSDMHRGYADSPSKA	0.109855	0.492968	0.1579	0.256771	0.109607	0.0862279	0.152017
CASP8_HUMAN_334	DGQEAPIYELTSQFT	5.2023	2.76207	2.31828	2.19166	3.74454	3.32159	5.4101
CASP8_HUMAN_380	TDSEEQPYLEMDLSS	3.61164	1.20598	1.36081	1.52793	0.190844	0.151056	4.21956
CASP8_HUMAN_448	TILTEVNYEVSNKDD	0.194184	0.171816	0.27995	0.169017	0.146031	0.198465	0.2977
CASQ1_HUMAN_43	EGLDFPEYDGVDRVI	1.98248	1.85963	2.47219	2.03067	0.599108	0.647888	3.96663
CASQ2_HUMAN_282	EKSDPDGYEFLEILK	0.178135	0.215273	0.154682	0.223181	0.230847	1.40678	4.61564
CAT_HUMAN_231	NANGEAVYCKFHYKT	2.98995	2.32616	2.94168	2.48927	4.21458	3.02783	0.541635
CAT_HUMAN_231_YA	NANGEAVYCKFHAKT	2.52442	2.19251	2.58883	2.16505	3.22866	3.11548	0.345602
CAT_HUMAN_386	YRARVANYQRDGPMC	0.134924	0.233343	0.17095	0.27031	0.1182	0.139633	0.127658
CAT_HUMAN_386_YA	ARARVANYQRDGPMC	0.142292	0.203578	0.149612	0.201913	0.115754	0.11832	0.151388
CATIN_HUMAN_559	DDYDAGRYSPRLLTA	0.573712	1.75003	1.81802	0.864556	1.90083	0.303844	0.215371
CATIN_HUMAN_559_YA	DDADAGRYSPRLLTA	0.681499	0.228531	0.165954	0.180355	0.154129	0.147894	0.167666
CAV1_HUMAN_14	VDSEGHLYTVPIREQ	0.786852	0.960341	0.973106	1.32772	1.87815	3.3339	0.476035
CAV1_HUMAN_25	IREQGNIYKPNNKAM	0.383537	0.230019	0.259499	0.187663	0.154408	0.571297	0.168175
CAV1_HUMAN_6	GGMSGGKYVDSEGHL	0.125314	0.177024	0.173991	0.160065	0.116012	0.121334	0.163766
CAV2_HUMAN_27	SHHSGLEYADPEKFA	0.128593	0.186313	0.347681	0.175147	0.1446	2.74044	0.362366
CBL_HUMAN_371	TQEQYELYCEMGSTF	2.73116	2.21248	2.22034	1.94546	2.93315	1.91201	4.56804
CBL_HUMAN_371_YA	TQEQAELYCEMGSTF	3.01581	2.13834	2.37248	2.18545	3.24153	2.84999	3.93727
CBL_HUMAN_674	SSSANAIYSLAARPL	3.5204	3.61079	2.67706	3.05702	4.02204	4.1545	0.342245
CBL_HUMAN_700	EGEEDTEYMTPSSRP	0.190501	0.308684	0.166766	0.427882	1.63751	2.57868	4.48403
CBL_HUMAN_774	SENEDDGYDVPKPPV	0.0867566	0.182041	0.18481	0.160288	0.111936	2.23501	3.14356
CBLB_HUMAN_665	GHLGSEEYDVPPRLS	3.03067	3.17654	2.71231	2.34034	3.83541	3.9594	4.48753
CBLB_HUMAN_709	VEEDDDEYKIPSSHP	0.17736	0.204133	0.252555	0.189707	0.143287	1.76081	4.56246
CBLB_HUMAN_889	TNRTSQDYDQLPSCS	0.290501	0.477226	0.462911	0.308832	1.94748	2.21389	2.68417
CBLC_HUMAN_341	SEEQLQLYWAMDSTF	1.5135	1.39327	1.60794	1.15976	1.34623	1.41809	2.3339
CBPD_HUMAN_265	GGSVVASYPFDDSPE	0.136101	0.224586	0.171542	0.214084	0.157067	0.122356	0.219018
CC105_HUMAN_372	TKYNQELYTTHGLIK	2.59394	2.26241	2.72912	2.09794	3.36722	3.12739	0.244225
CC105_HUMAN_372_YA	TKANQELYTTHGLIK	2.54023	2.63796	3.24453	2.43543	4.13192	2.73944	0.199723
CCR1_HUMAN_132	ILLTIDRYLAIVHAV	0.311719	0.287725	0.307785	0.341906	0.363579	0.493453	1.18928
CD11A_HUMAN_582	YGSPLKAYTPVVVTQ	0.222374	0.254812	0.163181	0.188968	0.364848	2.05357	0.148841
CD11A_HUMAN_582_YA	AGSPLKAYTPVVVTQ	0.11824	0.226142	0.223254	0.260269	0.123589	0.147966	0.181735
CD11B_HUMAN_594	YGSPLKAYTPVVVTL	0.144477	0.209841	0.188577	0.273773	0.369624	1.80704	0.251215
CD11B_HUMAN_594_YA	AGSPLKAYTPVVVTL	0.129853	0.331739	0.256074	0.243335	0.13711	0.1658	0.159968
CD19_HUMAN_348	GSGPQNQYGNVLSLP	0.501646	0.997424	1.24626	0.858372	0.164817	0.826372	0.157108
CD19_HUMAN_409	EEEEGEGYEEPDSEE	0.106259	0.174552	0.167148	0.179484	0.0879914	0.104401	0.161403
CD19_HUMAN_500	TSLGSQSYEDMRGIL	0.260594	0.153652	0.22723	0.298303	0.185872	0.111493	0.770101
CD19_HUMAN_508	EDMRGILYAAPQLRS	1.815	1.41998	2.62231	5.16392	3.18502	3.2508	0.190127
CD226_HUMAN_322	DDTREDIYVNYPTFS	3.97862	2.2028	2.5553	2.96275	4.17946	3.28321	4.95718
CD226_HUMAN_322_YA	DDTREDIYVNAPTFS	3.19031	2.72791	2.95278	2.59523	3.25605	2.73696	5.2177
CD28_HUMAN_191	SRLLHSDYMNMTPRR	0.228628	0.233506	0.32371	0.189007	0.224262	0.984478	0.257405
CD28_HUMAN_209	TRKHYQPYAPPRDFA	0.76022	0.262233	0.652858	0.411319	1.55753	1.29794	0.173548
CD28_HUMAN_209_YA	TRKHAQPYAPPRDFA	0.418876	0.389236	0.361654	0.208955	0.810809	0.71352	0.255782
CD300LF_HUMAN_236	VDQVEVEYVTMASLP	2.41203	1.70879	1.35552	1.45992	0.937393	2.09006	4.29879
CD300LF_HUMAN_263	AEDQEPTYCNMGHLS	3.14837	3.40751	2.48595	2.51429	3.55613	3.35948	5.49799
CD33_HUMAN_340	EMDEELHYASLNFHG	3.11557	1.98554	2.10433	5.1993	3.23286	2.87605	2.08964
CD33_HUMAN_358	SKDTSTEYSEVRTQG	1.44526	1.94906	2.3835	1.72428	1.5141	0.858853	0.425969
CD34_HUMAN_329	ERLGEDPYYTENGGG	2.54373	2.85553	1.4783	2.68559	0.326501	0.130734	0.306278
CD34_HUMAN_329_YA	ERLGEDPYATENGGG	1.36083	1.85837	0.348971	2.082	0.136872	0.14123	0.172272
CD34_HUMAN_339	ENGGGQGYSSGPGTS	0.154128	0.243854	0.182699	0.220205	0.163072	0.148555	0.187114
CD3G_HUMAN_171	KDREDDQYSHLQGNQ	0.205652	0.286794	0.5428	0.339504	0.244776	0.946917	0.462948
CD3Z_HUMAN_111	KNPQEGLYNELQKDK	2.15069	1.67318	1.90871	2.00877	3.23441	0.183434	0.181338
CD3Z_HUMAN_123	KDKMAEAYSEIGMKG	2.70982	1.66719	2.2012	2.09045	3.16869	2.30188	0.260968
CD3Z_HUMAN_142	GKGHDGLYQGLSTAT	2.48988	2.8882	3.37955	2.94488	3.52467	0.908844	0.134708
CD3Z_HUMAN_153	STATKDTYDALHMQA	0.753537	2.02098	1.14543	1.26383	2.21457	0.141299	0.214696
CD3Z_HUMAN_83	NLGRREEYDVLDKRR	0.216969	0.187371	0.272287	0.16589	0.16039	0.116171	0.124337
CD5_HUMAN_453	ASHVDNEYSQPPRNS	0.206778	0.39335	0.347148	0.204883	1.56079	2.80514	4.11736
CD5_HUMAN_487	DNSSDSDYDLHGAQR	0.567912	1.17756	0.802217	0.873267	0.0973512	0.0870103	1.40011
CD6_HUMAN_662	DSTDNDDYDDISAAG	0.181268	0.275211	0.193073	0.193385	0.148485	0.129839	4.57346
CD72_HUMAN_39	DDDGEITYENVQVPA	3.00577	2.04415	1.93676	2.15375	2.64	2.17542	4.88623
CD72_HUMAN_7	GMAEAITYADLRFVK	3.02749	2.47929	2.6527	2.98788	3.31549	2.71133	0.215475
CD79A_HUMAN_188	EYEDENLYEGLNLDD	3.43165	2.24973	3.06165	2.01955	3.77074	1.33705	4.67149
CD79A_HUMAN_188_YA	EAEDENLYEGLNLDD	3.01706	2.2293	3.00329	2.31616	3.3808	0.691906	4.16337
CD79A_HUMAN_199	NLDDCSMYEDISRGL	3.1748	1.96699	1.40721	1.97656	3.56583	1.68161	4.69394
CD79A_HUMAN_210	SRGLQGTYQDVGSLN	1.53854	1.22609	1.79359	1.8049	2.09822	2.41108	0.398055
CD79B_HUMAN_196	GMEEDHTYEGLDIDQ	2.69444	1.84199	2.57671	2.82307	1.97418	0.111837	3.29979
CD79B_HUMAN_207	DIDQTATYEDIVTLR	3.13967	3.62406	2.96794	2.85049	2.98527	2.25796	4.63729
CDC23_HUMAN_273	VSQIAVAYHNIRDID	0.106315	0.206642	0.232182	0.180909	0.183671	0.493685	0.18231
CDC37_HUMAN_298	GLDPVEVYESLPEEL	2.92125	2.10171	3.04408	2.25629	2.55993	0.20557	4.21959
CDC42_HUMAN_64	DTAGQEDYDRLRPLS	0.913931	3.00644	1.20874	1.37023	2.34782	1.61427	3.10396
CDC45_HUMAN_130	DDLEVPAYEDIFRDE	0.475594	0.199126	0.264695	0.333942	0.21043	0.29726	3.7478
CDC73_HUMAN_290	KQPIPAAYNRYDQER	0.143428	0.262719	0.23242	0.224858	0.147023	0.163817	0.159219
CDC73_HUMAN_290_YA	KQPIPAAYNRADQER	0.146552	0.299069	0.254564	0.24554	0.14263	0.13562	0.181642
CDC73_HUMAN_293	IPAAYNRYDQERFKG	0.150267	0.18418	0.281949	0.219657	0.129022	0.182084	0.159053
CDC73_HUMAN_293_YA	IPAAANRYDQERFKG	0.157328	0.183778	0.211488	0.154579	0.127263	0.104234	0.166385
CDC73_HUMAN_315	KIDTMGTYHGMTLKS	0.94899	1.40459	2.28891	1.28052	1.41396	0.270487	0.208474
CDCP1_HUMAN_734	KDNDSHVYAVIEDTM	2.87183	1.01063	1.14796	1.08104	3.2837	3.12383	0.85302
CDCP1_HUMAN_743	VIEDTMVYGHLLQDS	3.45154	2.75547	3.37969	2.86036	3.92541	3.6828	0.277633
CDH2_HUMAN_852	NDPTAPPYDSLLVFD	0.661668	0.478484	0.43038	1.07062	0.40592	0.132685	0.230066
CDH2_HUMAN_860	DSLLVFDYEGSGSTA	0.149466	0.19238	0.208304	0.201767	0.143524	0.125382	0.554725
CDH2_HUMAN_884	SSGGEQDYDYLNDWG	3.13329	1.93687	1.84609	1.51616	3.31488	3.16911	4.89745
CDH2_HUMAN_884_YA	SSGGEQDYDALNDWG	1.48712	0.736181	0.606324	0.6839	0.344489	0.336393	4.38662
CDH2_HUMAN_886	GGEQDYDYLNDWGPR	3.10979	2.00273	2.18089	1.54473	3.71604	3.36254	4.66803
CDH2_HUMAN_886_YA	GGEQDADYLNDWGPR	0.185664	0.339132	0.280679	0.420496	0.110625	0.214608	4.80417
CDH5_HUMAN_658	GEMDTTSYDVSVLNS	0.135951	0.201525	0.236809	0.242071	0.163932	0.124965	0.126616
CDK1_HUMAN_15	EKIGEGTYGVVYKGR	3.67018	3.71897	2.94898	3.25237	3.69649	2.48827	0.218165
CDK1_HUMAN_15_YA	EKIGEGTYGVVAKGR	3.25463	3.3549	2.8875	3.02241	3.7596	1.9772	0.146677
CDK1_HUMAN_19	EGTYGVVYKGRHKTT	3.53371	2.92602	3.31894	3.17353	4.08197	2.80347	0.14963
CDK1_HUMAN_19_YA	EGTAGVVYKGRHKTT	0.164662	0.133521	0.129239	0.17066	0.167551	0.17609	0.198556
CDK1_HUMAN_4	GGGGMEDYTKIEKIG	0.121078	0.390981	0.233147	0.376442	0.154747	0.081257	3.3534
CDK12_HUMAN_73	VIKPLVEYDDISSDS	0.155637	0.386326	0.246259	0.143507	0.169503	0.14896	0.294896
CDK2_HUMAN_15	EKIGEGTYGVVYKAR	3.77793	2.74117	3.69258	2.91537	4.53106	2.80664	1.15334
CDK2_HUMAN_15_YA	EKIGEGTYGVVAKAR	3.24074	3.57962	3.66017	3.03913	3.4662	2.06931	0.177876
CDK2_HUMAN_19	EGTYGVVYKARNKLT	3.29947	3.26752	2.6669	3.4839	3.8959	2.95894	0.193534
CDK2_HUMAN_19_YA	EGTAGVVYKARNKLT	0.127052	0.182937	0.222918	0.228328	0.102379	0.163574	0.16868
CDK4_HUMAN_17	AEIGVGAYGTVYKAR	2.3399	1.91047	2.59604	1.64498	3.7197	0.641488	0.207783
CDK4_HUMAN_17_YA	AEIGVGAYGTVAKAR	2.45242	2.07958	1.86047	1.91239	3.71134	0.228859	0.223099
CDK5_HUMAN_15	EKIGEGTYGTVFKAK	3.5711	3.81753	2.77198	3.02024	3.92027	2.70447	0.246723
CDK6_HUMAN_24	AEIGEGAYGKVFKAR	3.17162	2.99352	2.98681	3.43235	3.56763	0.158159	0.255346
CDKL5_HUMAN_171	NNANYTEYVATRWYR	1.97694	2.22797	2.63231	1.99904	2.55918	2.4042	1.59392
CDKL5_HUMAN_171_YA	NNANATEYVATRWAR	0.162693	0.492987	0.402191	0.36538	0.512124	2.23212	0.243493
CDN1B_HUMAN_88	KGSLPEFYYRPPRPP	0.10027	0.246942	0.128048	0.123921	0.131942	0.646115	0.235134
CDN1B_HUMAN_88_YA	KGSLPEFYARPPRPP	0.140476	0.278155	0.207334	0.214945	0.381867	1.7758	0.202541
CDN1B_HUMAN_89	GSLPEFYYRPPRPPK	0.106877	0.15689	0.162491	0.278587	0.139065	0.130301	0.191019
CDN1B_HUMAN_89_YA	GSLPEFAYRPPRPPK	0.160434	0.327262	0.235372	0.212927	0.153059	0.12275	0.0930221
CDV3_HUMAN_244	KLQLDNQYAVLENQK	2.18897	2.09529	2.82903	2.19302	1.94825	2.91461	0.274243
CE170_HUMAN_364	IKSDVPVYLKRLKGN	0.112362	0.159747	0.188704	0.239535	0.139228	0.129077	0.174059
CEAM1_HUMAN_493	NKMNEVTYSTLNFEA	3.35588	2.97122	3.08352	3.01932	3.71494	3.35458	0.571154
CELR3_HUMAN_2126	ASGCRVLYDACPKSL	0.637884	1.11685	1.11947	1.08443	2.58804	2.00725	0.258686
CELR3_HUMAN_3051	AASYGRIYAGGGTGS	0.307761	0.789103	0.722714	0.545283	0.320256	1.32217	0.159725
CELR3_HUMAN_3051_YA	AASAGRIYAGGGTGS	0.173498	0.293346	0.347422	0.209803	0.165893	1.53791	0.146892
CENPF_HUMAN_158	TPLTPSQYYSGSKYE	0.158806	0.192146	0.250377	0.261159	0.147403	0.115539	0.168346
CENPF_HUMAN_158_YA	TPLTPSQYASGSKAE	0.172309	0.185437	0.236514	0.131101	0.168729	0.11609	0.0953861
CFTR_HUMAN_512	NIIFGVSYDEYRYRS	1.0795	1.87904	1.15067	1.3714	0.437622	0.574713	0.565678
CFTR_HUMAN_512_YA	NIIFGVSYDEARARS	0.103954	0.194903	0.275062	0.111517	0.135865	0.0750827	0.22205
CG031_HUMAN_442	TKKTEDLYWRQQSLK	1.50535	1.84035	1.15591	1.79956	2.48753	2.58852	0.258255
CH60_HUMAN_90	SIDLKDKYKNIGAKL	0.160009	0.173427	0.182294	0.11135	0.18136	0.0991171	0.2205
CHERP_HUMAN_714	GWEQNGLYEFFRAKM	4.15494	2.54537	4.23737	2.48681	4.42925	3.48903	4.01556
CHN2_HUMAN_153	KMTTNPIYEHIGYAT	4.02156	3.22051	2.68635	2.76512	4.27522	4.16385	2.51755
CHN2_HUMAN_153_YA	KMTTNPIYEHIGAAT	3.37326	3.30633	3.62776	3.78315	3.56253	3.31894	2.75931
CHN2_HUMAN_21	VSSDAEEYQPPIWKS	0.351033	0.51935	0.469292	0.744928	0.936426	2.17388	3.85684
CHRNA7_HUMAN_386	ASNGNLLYIGFRGLD	3.56633	2.74366	2.73833	2.89794	3.6363	2.45213	0.338563
CHRNA7_HUMAN_442	KILEEVRYIANRFRC	0.229901	0.153377	0.19977	0.17201	0.230256	0.401536	0.42184
CI078_HUMAN_147	KNAEDCLYELPENIR	3.65001	2.92301	2.87422	2.70934	3.94763	3.32071	5.97634
CKAP2_HUMAN_599	YNVSTTPYLQSVKKK	0.155155	0.305883	0.374753	0.365393	0.218982	0.228594	0.215053
CKAP2_HUMAN_599_YA	ANVSTTPYLQSVKKK	0.112116	0.206379	0.114579	0.126367	0.199765	0.130346	0.466567
CL12B_HUMAN_7	GMSEEVTYATLTFQD	3.03046	3.84347	2.6487	2.95096	3.25677	2.73299	1.12909
CLC1B_HUMAN_7	GMQDEDGYITLNIKT	0.200249	0.212632	0.403362	0.277052	0.22118	0.174939	0.360565
CLD3_HUMAN_198	YTATKVVYSAPRSTG	0.177157	0.233463	0.32252	0.287887	1.68821	2.77703	0.191107
CLD3_HUMAN_198_YA	ATATKVVYSAPRSTG	0.208866	0.282801	0.198149	0.15065	1.0595	2.79176	0.122179
CLH1_HUMAN_184	VVGAMQLYSVDRKVS	0.762178	1.45608	1.14791	1.32367	0.329036	0.116412	0.145177
CLH2_HUMAN_899	CFLRENAYYDSSVVG	0.885876	0.954564	0.848736	1.19515	0.511621	2.2805	1.04691
CLH2_HUMAN_899_YA	CFLRENAYADSSVVG	0.326186	0.316212	0.348001	0.396008	0.24433	1.93092	0.269133
CLIC1_HUMAN_233	DEEIELAYEQVAKAL	2.42357	2.7767	1.57493	2.66867	2.94551	0.865401	5.05262
CLIC5_HUMAN_33	EENESPHYDDVHEYL	0.160976	0.180286	0.339826	0.486182	0.227292	0.352685	4.01463
CLIC5_HUMAN_33_YA	EENESPHYDDVHEAL	0.104125	0.15481	0.184631	0.202981	0.110711	0.107505	1.76413
CLK2_HUMAN_153	DAEGHLIYHVGDWLQ	4.62754	2.6472	2.76567	2.71477	4.38474	3.08985	1.05431
CLK2_HUMAN_99	DTDYRHSYEYQRENS	0.208127	0.214691	0.175293	0.353854	0.135628	0.571421	0.240885
CLK2_HUMAN_99_YA	DTDARHSYEAQRENS	0.121863	0.215986	0.180952	0.19229	0.10159	0.127508	0.167641
CLK3_HUMAN_155	TMHHCKRYRSPEPDP	0.148683	0.280866	0.221803	0.141531	0.152118	0.164775	0.196791
CLM7_HUMAN_188	EPGEQPIYMNFSEPL	3.77462	2.6396	3.39624	3.05594	4.56359	3.65502	4.4434
CLM8_HUMAN_293	EEEPDSDYSVIRKTG	2.22323	2.15294	2.24639	1.9518	2.66196	1.16101	4.36768
CLNK_HUMAN_69	KGHSDDDYDDPELRM	0.122983	0.206558	0.18368	0.197333	0.118023	0.123643	4.87335
CMGA_HUMAN_194	ASLPSQKYPGPQAEG	0.161488	0.23959	0.231988	0.539167	0.136069	0.121469	0.260179
CNKSR1_HUMAN_665	KEQNRELYSEGLGAW	2.09937	1.47158	2.17775	2.35294	2.35769	2.95519	0.399467
CNTN6_HUMAN_882	YFASVRAYNTAGTGP	0.120866	0.268473	0.167866	0.234505	0.138533	1.04195	0.219396
CNTN6_HUMAN_882_YA	AFASVRAYNTAGTGP	0.135998	0.257551	0.122865	0.210649	0.119989	0.119493	0.163543
COF1_HUMAN_68	GQTVDDPYATFVKML	3.24784	2.81328	2.57459	2.65567	3.50148	3.32556	0.307917
CORO7_HUMAN_288	GERQLYCYEVVPQQP	0.411162	0.527841	0.482917	0.585479	0.480442	0.324742	2.40084
CORO7_HUMAN_288_YA	GERQLACYEVVPQQP	0.56955	0.634538	0.534802	0.584072	1.18996	0.489734	1.71891
CORO7_HUMAN_758	GDTRVFLYELLPESP	2.58755	2.17819	1.53224	2.53919	3.42235	0.452273	3.2882
CRK_HUMAN_221	GGPEPGPYAQPSVNT	0.223134	0.267287	0.0844613	0.135219	0.14258	3.13455	0.202598
CRK_HUMAN_239	NLQNGPIYARVIQKR	2.08792	2.30201	2.63372	2.28003	3.97787	3.01531	0.199957
CRKL_HUMAN_127	TAEDNLEYVRTLYDF	2.568	2.34632	1.40849	2.08471	0.807903	0.485001	3.04753
CRKL_HUMAN_127_YA	TAEDNLEYVRTLADF	0.11456	0.113451	0.0535858	0.0159567	0.101366	1.1854	1.92681
CRKL_HUMAN_207	IPEPAHAYAQPQTTT	0.150824	0.196356	0.192362	0.232445	0.11006	2.21063	0.190487
CS025_HUMAN_63	EAPGEQLYQQSRAYV	2.27799	2.0701	1.79637	1.90889	3.26161	3.21147	0.449104
CS025_HUMAN_63_YA	EAPGEQLYQQSRAAV	1.65394	2.50336	1.99088	1.9866	2.98995	3.2302	0.207398
CSF1R_HUMAN_546	KYKQKPKYQVRWKII	0.490096	0.292665	0.588577	0.41099	0.601587	0.403896	0.319886
CSF1R_HUMAN_546_YA	KAKQKPKYQVRWKII	0.397265	0.270953	1.02204	0.467453	0.614837	0.317566	0.192525
CSF1R_HUMAN_561	ESYEGNSYTFIDPTQ	0.630885	0.577086	0.225301	0.796497	0.126707	0.198514	3.40813
CSF1R_HUMAN_561_YA	ESAEGNSYTFIDPTQ	0.285771	0.236625	0.35043	0.621792	0.127997	0.1263	3.00274
CSF1R_HUMAN_699	DPEGGVDYKNIHLEK	0.19921	1.25582	0.132542	0.302589	0.227592	0.17099	0.291223
CSF1R_HUMAN_708	NIHLEKKYVRRDSGF	0.142559	0.277362	0.310115	0.238046	0.211289	0.17683	0.233166
CSF1R_HUMAN_723	SSQGVDTYVEMRPVS	2.31405	2.8272	2.81854	2.54712	2.33164	0.769798	2.16646
CSF1R_HUMAN_809	DIMNDSNYIVKGNAR	0.120435	0.285321	0.17575	0.154034	0.146025	0.107987	0.116594
CSF1R_HUMAN_923	EDRRERDYTNLPSSS	0.125618	0.279677	0.23825	0.178677	0.111337	0.138735	0.337211
CSF2RB_HUMAN_466	ALRFCGIYGYRLRRK	0.133102	0.231707	0.270429	0.293361	0.162644	0.118803	0.174219
CSF2RB_HUMAN_466_YA	ALRFCGIYGARLRRK	0.126039	0.35203	0.184677	0.207046	0.110998	0.157192	0.170292
CSF2RB_HUMAN_822	VLQQVGDYCFLPGLG	2.0237	1.43074	1.84191	1.8146	3.38249	2.90491	4.73902
CSF2RB_HUMAN_882	KALKQQDYLSLPPWE	0.161105	0.159075	0.213748	0.238529	0.182984	2.69938	2.73606
CSK_HUMAN_184	VAAQDEFYRSGWALN	0.247701	0.265936	0.375737	0.334666	0.160427	2.11674	0.193638
CSK_HUMAN_304	DVCEAMEYLEGNNFV	0.180645	0.17094	0.232991	0.322272	0.22695	0.304873	0.908481
CSK_HUMAN_416	DGCPPAVYEVMKNCW	3.35807	2.84947	2.93559	5.95432	3.81618	3.55198	2.4652
CSK22_HUMAN_13	AGSRARVYAEVNSLR	1.3613	1.73074	1.49517	1.9963	2.40715	2.4535	0.130381
CSKI1_HUMAN_253	NAHVRNTYSQTALDI	0.136594	0.259093	0.158363	0.136103	0.139242	0.133301	0.201892
CSKI2_HUMAN_253	DVNIRNTYNQTALDI	0.120378	0.174795	0.246665	0.249171	0.150697	0.10476	0.192061
CSNK2A1_HUMAN_182	DWGLAEFYHPGQEYN	1.97488	1.4924	2.12191	1.75845	0.328502	1.98008	0.777545
CSNK2A1_HUMAN_182_YA	DWGLAEFYHPGQEAN	0.459199	0.517614	0.575366	0.694545	0.171242	0.204523	0.200275
CTLA4_HUMAN_201	SPLTTGVYVKMPPTE	0.318028	0.646601	1.17844	0.580749	0.403126	0.170543	0.417613
CTNB1_HUMAN_142	AVVNLINYQDDAELA	0.138532	0.449121	0.430786	0.282801	0.105971	0.114235	0.181988
CTNB1_HUMAN_333	NIMRTYTYEKLLWTT	1.88354	1.74106	1.35545	1.65647	3.07919	0.978464	1.77741
CTNB1_HUMAN_333_YA	NIMRTATYEKLLWTT	1.93798	1.74443	2.11138	1.74215	2.89835	0.729913	0.532152
CTNB1_HUMAN_64	VDTSQVLYEWEQGFS	2.72297	2.28178	1.52752	2.18634	1.35494	0.21965	0.47913
CTNB1_HUMAN_86	VADIDGQYAMTRAQR	0.674291	2.03362	1.35576	1.01045	0.819795	2.67209	0.221458
CTND1_HUMAN_221	SRHYEDGYPGGSDNY	0.121176	0.145809	0.105327	0.145944	0.138202	0.115312	0.148075
CTND1_HUMAN_221_YA	SRHAEDGYPGGSDNA	0.179484	0.195383	0.216072	0.201856	0.115174	0.10869	0.201247
CTND1_HUMAN_228	YPGGSDNYGSLSRVT	2.44743	3.05922	2.55552	2.26092	3.43662	2.44144	0.159633
CTND1_HUMAN_228_YA	APGGSDNYGSLSRVT	2.10804	3.34756	2.6423	2.61848	2.74067	1.35513	0.146329
CTND1_HUMAN_257	APSRQDVYGPQPQVR	2.09185	3.02458	2.91411	2.11377	2.91588	1.10248	0.154072
CTND1_HUMAN_291	DDQRSMGYDDLDYGM	0.562517	0.35781	0.6401	0.769686	0.132896	0.134003	1.62412
CTND1_HUMAN_291_YA	DDQRSMGYDDLDAGM	0.110921	0.163305	0.142562	0.156745	0.120376	0.114845	0.187103
CTND1_HUMAN_904	TKSLDNNYSTPNERG	0.142742	0.0922116	0.0972846	0.142747	0.161474	1.89194	0.368624
CTND2_HUMAN_516	CPSVESPYSKSGPAL	1.12677	1.63624	0.697585	1.69417	0.601322	0.251159	0.219236
CTRO_HUMAN_1196	TERSDLEYQLENIQV	0.826764	0.898915	0.139346	0.988277	0.0872741	0.0931411	0.321382
CTTN_HUMAN_334	VTQVSSAYQKTVPVE	0.143514	0.225893	0.208077	0.209797	0.10375	0.119408	0.129555
CU059_HUMAN_264	EENDDDAYLNSPWAD	0.240395	0.274667	0.262869	0.271626	0.174815	0.528686	4.01204
CXA1_HUMAN_247	VKGKSDPYHATSGAL	0.150311	0.242542	0.632665	0.227239	0.156831	0.145499	0.185883
CYC_HUMAN_49	GQAPGYSYTAANKNK	0.103478	0.140208	0.226067	0.199357	0.131831	0.128886	0.219061
CYC_HUMAN_49_YA	GQAPGASYTAANKNK	0.123055	0.192095	0.208441	0.224604	0.166962	0.13204	0.159458
CYC_HUMAN_98	ERADLIAYLKKATNE	0.124603	0.163021	0.243029	0.315607	0.177097	0.119053	0.243785
CYP19A1_HUMAN_361	KVMENFIYESMRYQP	3.76308	2.71143	2.91168	2.99729	4.26642	3.94146	0.719506
CYP19A1_HUMAN_361_YA	KVMENFIYESMRAQP	3.56858	2.24786	2.41866	2.17821	4.60442	4.2265	0.644899
DAB1_HUMAN_198	EDVEDPVYQYIVFEA	2.85285	1.65911	2.65487	1.82066	3.32931	2.33363	4.7568
DAB1_HUMAN_198_YA	EDVEDPVYQAIVFEA	2.81177	2.18174	2.57932	2.14171	3.26611	2.5391	4.71478
DAB1_HUMAN_232	SQKKEGVYDVPKSQP	2.42237	2.15912	1.53245	3.46479	3.57685	3.8072	0.214833
DAB2_HUMAN_170	KDLFQVIYNVKKKEE	0.336483	0.56911	0.616157	0.463472	0.403717	0.129606	0.21677
DAPP1_HUMAN_139	KVEEPSIYESVRVHT	3.35816	1.79258	2.12592	2.00521	4.33205	3.54452	3.46255
DAZL_HUMAN_276	SVVTQDDYFKDKRVH	0.143873	0.190511	0.267643	0.267572	0.129591	0.139818	0.166064
DCLK1_HUMAN_520	KPENLLVYEHQDGSK	0.407732	0.5527	0.410565	0.712232	0.19057	0.225576	0.166157
DCP1B_HUMAN_191	ITSSSAIYDNPNLIK	3.16434	2.08973	2.30281	2.46508	3.77768	3.727	0.246918
DCTN2_HUMAN_6	GGMADPKYADLPGIA	0.169128	0.139825	0.226096	0.247777	0.753514	2.86089	0.181071
DCTN2_HUMAN_86	TGYESGEYEMLGEGL	3.2943	2.04104	2.50503	2.42042	3.45113	3.33088	6.71757
DCTN2_HUMAN_86_YA	TGAESGEYEMLGEGL	2.95806	2.82733	2.73374	2.3815	2.60823	2.09636	4.45421
DDR1_HUMAN_484	GPREPPPYQEPRPRG	0.201432	0.295584	0.187511	0.280424	0.210251	2.79045	0.218879
DDR1_HUMAN_520	YRLLLATYARPPRGP	0.143204	0.335704	0.191288	0.101559	0.131123	0.12144	0.222903
DDR1_HUMAN_520_YA	ARLLLATYARPPRGP	0.2016	0.323839	0.217248	0.223625	0.161414	0.127435	0.169948
DDR1_HUMAN_740	AQGPTISYPMLLHVA	0.159461	0.258838	0.182454	0.225006	0.143788	0.112159	0.223562
DDR1_HUMAN_792	FGMSRNLYAGDYYRV	2.88497	3.66632	2.58101	2.21475	2.68356	2.87987	4.86641
DDR1_HUMAN_792_YA	FGMSRNLYAGDAARV	0.151158	0.223751	0.223578	0.231765	0.123775	0.147347	0.204646
DDR1_HUMAN_797	NLYAGDYYRVQGRAV	2.28089	2.20431	1.85431	1.76037	2.58493	2.8377	3.94633
DDR1_HUMAN_797_YA	NLAAGDAYRVQGRAV	0.218925	0.277479	0.215917	0.185239	0.104245	0.146299	0.168382
DDR2_HUMAN_471	EQGSNSTYDRIFPLR	3.97293	3.47154	3.12448	3.07439	4.40098	3.49861	0.30713
DDR2_HUMAN_736	FGMSRNLYSGDYYRI	2.82518	3.06517	3.62413	2.70382	2.80287	2.96271	4.594
DDR2_HUMAN_736_YA	FGMSRNLYSGDAARI	0.179241	0.30222	0.427842	0.287142	0.222636	0.159695	0.117515
DDR2_HUMAN_741	NLYSGDYYRIQGRAV	1.82943	1.77493	1.68424	1.48758	2.37386	2.25603	3.30812
DDR2_HUMAN_741_YA	NLASGDAYRIQGRAV	0.125117	0.189569	0.244301	0.19144	0.0978965	0.130386	0.152492
DDX3X_HUMAN_104	DDRGRSDYDGIGSRG	0.170257	0.261139	0.237581	0.226046	0.240062	0.172364	0.174976
DDX3Y_HUMAN_103	DDRGRSDYDGIGNRE	0.17809	0.179086	0.707289	0.336643	0.207423	0.151772	0.146726
DDX41_HUMAN_33	EDEDDEDYVPYVPLR	3.16506	2.38286	3.05324	1.91828	3.05481	1.98608	5.03448
DDX41_HUMAN_33_YA	EDEDDEDYVPAVPLR	0.121398	0.16696	0.203328	0.203213	0.207449	0.13375	4.5708
DDX41_HUMAN_364	DIRTIFSYFKGQRQT	0.138731	5.69435	0.152898	0.569121	0.244121	0.158051	0.150767
DDX41_HUMAN_414	DVIQEVEYVKEEAKM	0.158046	0.235292	0.265549	0.248627	0.112908	0.0956989	0.447644
DDX46_HUMAN_294	NDQDAMEYSSEEEEV	0.200975	0.235981	0.158663	0.206233	0.122215	0.131047	0.266001
DDX5_HUMAN_297	AEDFLKDYIHINIGA	0.207317	0.214808	0.073196	0.508576	0.268038	0.249835	1.86479
DDX5_HUMAN_593	NGMNQQAYAYPATAA	0.169852	0.184399	0.379231	0.18907	0.126241	2.58756	0.387081
DDX5_HUMAN_593_YA	NGMNQQAYAAPATAA	0.142163	0.306522	0.325831	0.181429	0.13541	2.81269	0.204759
DEFI6_HUMAN_210	SMAIHEVYQELIQDV	3.4872	3.05662	3.31446	3.31414	3.68275	3.10319	2.39272
DEN1B_HUMAN_520	KSLDGALYDDEDDDD	0.140777	0.218812	0.224148	0.203	0.143029	0.125214	0.216333
DESP_HUMAN_2817	SKGLPSPYNMSSAPG	0.180039	0.5707	0.327203	0.441303	0.148557	0.112503	0.117971
DESP_HUMAN_56	TDQNSDGYCQTGTMS	0.150371	0.170331	0.250629	0.191162	0.11096	0.115808	0.184067
DGKA_HUMAN_335	ILPPSSIYPSVLASG	0.133769	0.254079	0.207129	0.105335	0.122226	0.108765	0.192384
DGKK_HUMAN_78	SESATELYTEPTPEP	0.171546	0.148838	0.257177	0.296892	0.203789	0.605038	1.35846
DHE3_HUMAN_135	SWEVIEGYRAQHSQH	0.1473	0.204153	0.16547	0.174217	0.137055	0.145696	0.208731
DHE3_HUMAN_512	IVHSGLAYTMERSAR	0.157886	0.346478	0.260721	0.22461	0.107885	0.264446	0.200396
DIDO1_HUMAN_1244	SEKKPSKYPLCSADA	0.144033	0.240122	0.417051	0.333929	0.230744	0.152825	0.195326
DLG1_HUMAN_399	KNTSDFVYLKVAKPT	0.176319	0.29525	0.221245	0.290746	0.18539	0.217816	0.146254
DLG2_HUMAN_505	AQYQPEDYARFEAKI	2.13443	2.54466	2.45817	2.05287	0.340781	2.36518	1.69977
DLG2_HUMAN_505_YA	AQAQPEDYARFEAKI	2.36823	2.83834	2.63896	2.02658	0.368757	2.74663	0.681999
DLG2_HUMAN_750	KFIEAGQYNDNLYGT	3.30171	2.8603	2.76623	2.95012	3.43832	1.5602	0.218948
DLG2_HUMAN_750_YA	KFIEAGQYNDNLAGT	0.110628	0.382135	0.157896	0.12823	0.0887556	0.270081	0.218196
DLG2_HUMAN_755	GQYNDNLYGTSVQSV	3.69716	3.18075	2.96082	3.20838	3.93578	3.75511	0.265336
DLG2_HUMAN_755_YA	GQANDNLYGTSVQSV	2.82616	1.61381	1.66175	1.65034	3.61075	2.97704	0.164083
DLG3_HUMAN_673	NEVDGQDYHFVVSRE	0.221183	0.447134	0.3656	0.300483	0.202399	1.73263	4.28341
DLG4_HUMAN_240	KNTYDVVYLKVAKPS	1.48312	2.14509	2.4025	2.33858	2.99151	2.27029	0.198295
DLG4_HUMAN_240_YA	KNTADVVYLKVAKPS	0.143339	0.478338	0.263564	0.313246	0.460737	0.975822	0.316895
DLG4_HUMAN_580	YEIDGRDYHFVSSRE	1.37077	1.4702	0.485514	1.3893	0.163909	0.926776	5.33224
DLG4_HUMAN_580_YA	AEIDGRDYHFVSSRE	0.263169	0.345404	0.283669	0.183631	0.132799	0.295459	4.64124
DLG4_HUMAN_715	IEDLSGPYIWVPARE	2.55451	2.14274	2.1303	2.07707	0.506586	0.281531	4.62522
DNB2_ADE02_195	ARALMDKYHVDNDLK	0.144504	0.214999	0.205665	0.241258	0.142777	0.105391	0.171273
DNB2_ADE04_174	MNMLMERYRVESDLK	0.153457	0.172881	0.167019	0.211515	0.140347	0.12201	0.131831
DNB2_ADE07_180	MAVLMERYRLDNDLR	0.134529	0.168196	0.273311	0.232709	0.175834	0.111423	0.18125
DNB2_ADE12_150	MAMLMEKYHVDHDER	0.126134	0.215472	0.247892	0.135266	0.156798	0.134694	0.198164
DNB2_ADE40_141	MIKLMEKYHVEAEEK	0.161149	0.245656	0.280666	0.151512	0.144645	0.0953339	0.144288
DNB2_ADE41_142	MNVLMEKYHVENDEK	0.121346	0.154011	0.170661	0.183752	0.113781	0.113292	0.171659
DNER_HUMAN_711	KKSRPAMYDVSPIAY	1.24289	0.652229	0.968752	0.874734	2.08735	3.79974	0.237453
DNER_HUMAN_711_YA	KKSRPAMYDVSPIAA	0.695212	0.308245	0.673973	0.520317	1.08542	2.96717	0.362919
DNER_HUMAN_721	SPIAYEDYSPDDKPL	0.157652	0.176073	0.194395	0.199146	0.132102	0.344283	0.226543
DNER_HUMAN_721_YA	SPIAAEDYSPDDKPL	0.130816	0.17583	0.198662	0.195973	0.178236	0.141511	0.175086
DNJA1_HUMAN_381	RHYNGEAYEDDEHHP	0.0415175	0	0	0	0.659978	0.218549	0.473565
DNJA2_HUMAN_391	GGQRREAYNDSSDEE	0.137036	0.259108	0.153009	0.229303	0.136505	0.0955858	0.207625
DNJC5_HUMAN_17	STSGESLYHVLGLDK	3.08174	2.52676	2.56433	2.48248	4.26981	3.46118	1.68841
DOC11_HUMAN_248	ELKMLDKYSHYLAAE	0.140664	0.223503	0.26138	0.265866	0.215008	0.166044	0.168875
DOC11_HUMAN_248_YA	ELKMLDKYSHALAAE	0.134505	0.198772	0.18991	0.196303	0.116014	0.122964	0.155152
DOCK4_HUMAN_167	DLVPRKEYAMVDPED	0.12848	0.171665	0.242281	0.251135	0.130238	0.216283	0.205838
DOCK7_HUMAN_1257	METVPQLYDFTETHN	1.72222	1.63715	0.684564	2.08712	1.80603	1.09938	0.194314
DOK1_HUMAN_337	VQRKKPLYWDLYEHA	2.79899	1.27171	1.87922	1.65538	2.735	1.35822	2.98531
DOK1_HUMAN_337_YA	VQRKKPLYWDLAEHA	0.651358	0.488795	0.808311	0.564936	0.881684	0.773005	0.842668
DOK1_HUMAN_341	KPLYWDLYEHAQQQL	3.16293	2.43612	2.67025	2.6916	3.05215	3.26859	3.46126
DOK1_HUMAN_341_YA	KPLAWDLYEHAQQQL	0.439374	0.482002	0.720354	0.614325	0.389634	0.111713	0.526269
DOK1_HUMAN_362	DPKEDPIYDEPEGLA	3.22418	1.89714	2.52934	1.51589	3.16659	2.80138	3.98955
DOK1_HUMAN_398	ARVKEEGYELPYNPA	0.790369	0.818102	1.20986	0.927571	0.169488	0.732639	2.43149
DOK1_HUMAN_398_YA	ARVKEEGYELPANPA	0.124095	0.175541	0.189551	0.18253	0.113174	0.065184	0.462338
DOK1_HUMAN_409	YNPATDDYAVPPPRS	1.48362	1.30167	1.47018	0.781138	3.47644	3.03955	4.88288
DOK1_HUMAN_409_YA	ANPATDDYAVPPPRS	0.567333	0.786426	1.34398	0.527903	2.72946	2.50961	4.723
DOK1_HUMAN_449	KSHNSALYSQVQKSG	1.78588	1.73892	2.35904	1.70585	3.66588	2.27158	0.299319
DOK3_HUMAN_381	NDLASGLYASVCKRA	2.61974	3.01792	2.75191	2.32237	2.97416	1.99446	0.282695
DPH6_HUMAN_97	GDEVEDLYELLKLVK	3.50901	2.41665	3.43272	2.42653	3.35032	2.92939	5.08499
DPP10_HUMAN_138	SVSPDLKYVLLAYDV	0.250549	0.30586	0.348885	0.306866	0.168625	0.167264	0.243278
DPP10_HUMAN_138_YA	SVSPDLKYVLLAADV	0.133489	0.185609	0.173927	0.183339	0.132785	0.118477	0.176575
DPYL1_HUMAN_32	INDDQSLYADVYLED	3.12652	1.83882	1.88647	1.05308	2.66815	1.66454	2.88782
DPYL1_HUMAN_32_YA	INDDQSLYADVALED	2.8785	1.79185	2.42144	1.9712	2.09431	0.667047	0.596881
DPYL1_HUMAN_431	SHKSAVEYNIFEGME	0.253124	0.178874	0.306741	0.339551	0.138276	0.125498	0.1816
DPYL1_HUMAN_504	GMYDGPVYEVPATPK	3.46437	2.57219	2.18406	2.36285	3.84224	3.77814	5.34182
DPYL1_HUMAN_504_YA	GMADGPVYEVPATPK	3.85107	3.44155	2.81785	3.00299	3.94198	3.90384	4.80547
DPYL2_HUMAN_32	VNDDQSFYADIYMED	3.26787	1.58602	2.03032	1.1145	3.49425	1.38518	3.98193
DPYL2_HUMAN_32_YA	VNDDQSFYADIAMED	1.7695	0.849204	0.932626	1.08699	1.28134	0.569013	0.75611
DPYL2_HUMAN_431	THNSSLEYNIFEGME	1.39968	0.961926	1.01301	1.81765	0.237164	0.205527	0.329455
DPYL2_HUMAN_499	RGVPRGLYDGPVCEV	0.86971	0.642521	0.436493	0.914658	1.23249	0.262433	0.299138
DPYL3_HUMAN_431	NHQSAAEYNIFEGME	1.79191	1.72012	1.2621	1.88716	0.115553	0.320287	0.271546
DPYSL2_HUMAN_479	KPFPDFVYKRIKARS	0.14594	0.187775	0.275625	0.216587	0.17634	0.118975	0.254354
DUSP3_HUMAN_138	SPTLVIAYLMMRQKM	0.12566	0.159258	0.197335	0.242393	0.158586	0.0877805	0.251717
DUSP3_HUMAN_38	NEVTPRIYVGNASVA	0.155015	0.191883	0.188608	0.232141	0.125132	0.14755	0.186804
DVL2_HUMAN_18	VGETKVIYHLDEEET	1.48885	1.49876	0.353051	1.64638	0.25794	0.17839	0.206282
DVL2_HUMAN_275	VTLNMEKYNFLGISI	0.561627	0.191638	0.214784	0.334822	0.226794	0.198114	0.519541
DVL2_HUMAN_295	ERGDGGIYIGSIMKG	0.481644	1.07671	1.57831	1.15622	0.720587	1.23225	0.268897
DVL2_HUMAN_463	SDVVDWLYHHVEGFP	2.31292	1.97161	1.89077	2.29382	0.791951	1.72606	4.55077
DYN1_HUMAN_125	VPINLRVYSPHVLNL	0.171016	0.247832	0.225155	0.246785	0.132083	0.16625	0.163568
DYN1_HUMAN_354	SGDQIDTYELSGGAR	2.9889	2.53705	2.55875	2.74453	2.36122	0.113671	1.31754
DYN3_HUMAN_125	IPINLRVYSPHVLNL	0.189788	0.22122	0.223323	0.270126	0.135741	0.166677	0.211199
DYR1A_HUMAN_111	YKHINEVYYAKKKRR	0.132312	0.118139	0.17612	0.205408	0.100638	0.148377	0.26116
DYR1A_HUMAN_111_YA	AKHINEVYAAKKKRR	0.197559	0.408787	0.285017	0.282906	0.28152	0.0963895	0.272617
DYR1A_HUMAN_145	DGYDDDNYDYIVKNG	2.90311	2.50146	2.37208	2.46036	3.13887	2.67449	4.01322
DYR1A_HUMAN_145_YA	DGADDDNYDAIVKNG	0.40996	0.854033	0.373502	0.563253	1.85936	0.136438	3.88617
DYR1A_HUMAN_159	GEKWMDRYEIDSLIG	0.136174	0.11185	0.179053	0.194611	0.143163	0.123339	0.17924
DYR1A_HUMAN_177	FGQVVKAYDRVEQEW	0.134588	0.101622	0.142744	0.213866	0.0995238	0.078402	0.206522
DYR1A_HUMAN_219	KHDTEMKYYIVHLKR	0.547051	0.449376	0.434492	0.416075	0.983788	0.755576	1.14544
DYR1A_HUMAN_219_YA	KHDTEMKYAIVHLKR	0.504892	0.911188	0.821706	0.656573	2.87651	2.23113	0.414438
DYR1A_HUMAN_449	SGHTVADYLKFKDLI	0.12414	0.220968	0.239017	0.358911	0.173289	2.67278	0.14432
DYR1B_HUMAN_111	GERWLERYEIDSLIG	0.111729	0.141405	0.153234	0.212429	0.238399	0.148316	0.200156
DYR1B_HUMAN_129	FGQVVKAYDHQTQEL	0.132626	0.231108	0.313906	0.129192	0.156215	0.100114	0.138092
DYR1B_HUMAN_401	PGHSPADYLRFQDLV	0.20775	0.239837	0.192636	0.156444	0.184457	2.60975	1.20204
DYR1B_HUMAN_92	KKVLNHGYDDDNHDY	0.15168	0.218036	0.239839	0.281915	0.153693	0.145417	0.261969
DYR1B_HUMAN_92_YA	KKVLNHGYDDDNHDA	0.351811	0.219081	0.251484	0.260967	0.153375	0.120943	0.218919
DYRK2_HUMAN_382	EHQRVYTYIQSRFYR	0.640459	0.731518	1.1952	0.788171	0.662265	0.753072	0.225898
DYRK2_HUMAN_382_YA	EHQRVATYIQSRFAR	0.155865	0.204058	0.33773	0.209517	0.189186	0.19568	0.233796
DYRK3_HUMAN_369	EYQKLYTYIQSRFYR	0.695253	0.683187	1.04564	0.899254	1.61995	1.4019	0.484614
DYRK3_HUMAN_369_YA	EAQKLATYIQSRFAR	0.14862	0.226645	0.307162	0.209355	0.176233	0.190452	0.284735
DYRK4_HUMAN_264	EHQKVYTYIQSRFYR	1.01338	1.00558	1.42438	1.0139	1.14066	1.15021	0.354158
DYRK4_HUMAN_264_YA	EHQKVATYIQSRFAR	0.157102	0.207538	0.352522	0.215902	0.209217	0.269706	0.366904
E2AK2_HUMAN_101	EGLSMGNYIGLINRI	0.15912	0.151615	0.158217	0.213996	0.242948	0.206702	0.42489
E2AK3_HUMAN_619	NKVDDCNYAIKRIRL	0.220258	0.160685	0.18886	0.223299	0.207806	0.215756	0.235568
E41L1_HUMAN_343	IKIRPGEYEQFESTI	0.340754	0.275556	0.275458	0.392707	0.19124	0.273447	0.62133
EAA2_HUMAN_539	SNSNQCVYAAHNSVI	2.84553	2.72395	2.85772	2.69686	2.92411	3.04669	0.258912
ECE2_HUMAN_39	GAADSAPYDWFGDFS	4.01397	3.53813	2.98652	3.01163	2.89409	1.03569	4.70382
EDNRB_HUMAN_439	NFRSSNKYSSSGGGG	0.160677	0.26764	0.215456	0.398678	0.148423	0.147182	0.139783
EF2_HUMAN_265	KKLWGDRYFDPANGK	0.145792	0.177424	0.16928	0.182932	0.209591	0.142568	0.147363
EF2_HUMAN_373	KYRCELLYEGPPDDE	0.298071	0.183017	0.361613	0.35085	0.182171	0.186198	0.469379
EF2_HUMAN_373_YA	KARCELLYEGPPDDE	0.302408	0.296183	0.185394	0.458418	0.199918	0.172865	0.467132
EFHD2_HUMAN_83	SRRVFNPYTEFKEFS	3.50472	2.97643	2.83489	2.79553	2.67812	0.342419	0.31368
EFS_HUMAN_253	GGTDEGIYDVPLLGP	3.24474	2.54419	2.23184	2.01554	4.17054	4.2601	4.79993
EGFR_HUMAN_1016	DVVDADEYLIPQQGF	0.279339	0.274973	0.250021	0.250186	0.274063	2.73927	4.80993
EGFR_HUMAN_1069	EDSFLQRYSSDPTGA	0.100822	0.533345	0.21143	0.126274	0.120591	0.126187	0.144102
EGFR_HUMAN_1092	TFLPVPEYINQSVPK	0.131227	0.154072	0.1225	0.277383	0.0945754	0.111625	0.175474
EGFR_HUMAN_1110	GSVQNPVYHNQPLNP	0.533656	0.891089	1.23685	0.76294	0.199323	0.145299	0.244734
EGFR_HUMAN_1125	APSRDPHYQDPHSTA	0.1953	0.310458	0.154518	0.166395	0.147989	2.52514	0.140897
EGFR_HUMAN_1138	TAVGNPEYLNTVQPT	0.128407	0.145034	0.154954	0.214613	0.105603	0.190626	0.167241
EGFR_HUMAN_1172	ISLDNPDYQQDFFPK	0.146424	0.209634	0.146676	0.220038	0.100492	0.111324	0.919067
EGFR_HUMAN_1197	STAENAEYLRVAPQS	0.147531	0.417324	0.306871	0.218219	0.237229	2.38305	3.64662
EGFR_HUMAN_727	SGAFGTVYKGLWIPE	1.53838	1.22037	2.24591	1.79739	0.23253	0.25167	0.220972
EGFR_HUMAN_764	KEILDEAYVMASVDN	0.931979	1.03109	0.573545	0.810576	0.126502	0.172968	1.12272
EGFR_HUMAN_998	SPTDSNFYRALMDEE	0.119636	0.233289	0.245417	0.248809	0.178597	0.166497	0.131614
EHD4_HUMAN_451	VAKDKPVYDELFYTL	3.13581	2.20839	2.24294	2.75655	3.61044	2.4648	0.522206
EHD4_HUMAN_451_YA	VAKDKPVYDELFATL	1.70836	0.834613	0.894662	1.11328	2.51751	2.24221	0.225176
EIF3E_HUMAN_445	ATQDSGFYGGGGGGG	0.145589	0.24744	0.293109	0.275104	1.12151	0.182582	0.21858
EIF3I_HUMAN_308	SSGGEDGYVRIHYFD	0.19849	0.52813	0.19839	0.292691	0.157929	0.320699	1.3709
EIF3I_HUMAN_308_YA	SSGGEDGYVRIHAFD	0.11668	0.19886	0.181784	0.175263	0.0941347	0.12529	0.386739
EIF3J_HUMAN_254	DGGYVQDYEDFMGGG	3.30228	1.68342	2.25441	1.06924	0.453541	0.241292	5.41784
EIF3J_HUMAN_254_YA	DGGAVQDYEDFMGGG	2.70481	0.955604	1.14746	0.688522	0.236986	0.108544	5.19025
ELAVL1_HUMAN_200	VALLSQLYHSPARRF	0.120169	0.240745	0.191412	0.198718	0.219599	0.467945	0.118365
ELAVL1_HUMAN_63	VAGHSLGYGFVNYVT	0.562228	0.308056	0.634135	0.567826	0.214877	0.194494	0.228114
ELAVL1_HUMAN_63_YA	VAGHSLGYGFVNAVT	0.177591	0.381231	0.174335	0.24503	0.166241	0.136545	0.19026
ELMO1_HUMAN_18	AIEWPGAYPKLMEID	0.130264	0.200776	0.152953	0.159149	0.140214	0.116519	0.201149
ELMO1_HUMAN_216	VLNSHDLYQKVAQEI	0.562436	0.790952	1.10942	0.802733	2.67808	2.34156	0.239954
ELMO1_HUMAN_395	AKHHQDAYIRIVLEN	0.180598	0.318674	0.249839	0.255503	0.282619	0.277216	0.634018
ELMO1_HUMAN_511	SKLQNLSYTEILKIR	0.144043	0.204369	0.226502	0.15029	0.187079	0.111071	0.144255
ELMO1_HUMAN_720	IPKEPSNYDFVYDCN	2.76115	0.963122	1.12599	1.08084	3.17772	1.78139	3.94242
ELMO1_HUMAN_720_YA	IPKEPSNYDFVADCN	0.135766	0.130668	0.232953	0.283852	0.151316	0.287965	3.12302
ELMO2_HUMAN_48	WSLPNPEYYTLRYAD	2.95995	2.34927	2.29718	1.97899	3.26137	2.6465	4.24156
ELMO2_HUMAN_48_YA	WSLPNPEYATLRAAD	2.49948	4.4316	2.61139	3.47831	2.87937	2.96926	0.399859
ELP3_HUMAN_202	GHTSNNIYEAVKYSE	3.13655	1.59794	1.69249	1.56275	4.68362	3.53498	2.07615
ELP3_HUMAN_202_YA	GHTSNNIYEAVKASE	3.17604	2.20295	3.35277	2.39831	3.95901	3.14633	1.79685
EMAL4_HUMAN_226	IINQEGEYIKMFMRG	1.61624	1.25416	0.803962	1.61766	1.05738	1.26213	2.9837
EMD_HUMAN_105	SYFTTRTYGEPESAG	0.15966	0.281218	0.195919	0.268629	0.116304	0.303435	0.348904
EMD_HUMAN_105_YA	SAFTTRTYGEPESAG	0.180769	0.249452	0.215013	0.234897	0.131182	0.212673	0.177641
EMD_HUMAN_155	KDRERPMYGRDSAYQ	0.201184	0.235649	0.320545	0.208379	0.341612	0.219148	0.175992
EMD_HUMAN_155_YA	KDRERPMYGRDSAAQ	0.177534	0.287757	0.220441	0.246159	0.30252	0.20322	0.125733
EMD_HUMAN_161	MYGRDSAYQSITHYR	1.58911	2.16962	1.99838	1.81583	3.47334	3.19627	0.501692
EMD_HUMAN_161_YA	MAGRDSAYQSITHAR	0.338106	1.44369	0.682688	0.553066	2.57627	2.17376	0.171151
EMD_HUMAN_167	AYQSITHYRPVSASR	0.209137	0.687286	0.470404	0.280552	2.01388	2.07195	0.165302
EMD_HUMAN_167_YA	AAQSITHYRPVSASR	0.10795	0.164072	0.1368	0.1461	0.154892	0.643073	0.147983
EMD_HUMAN_182	SSLDLSYYPTSSSTS	0.141703	0.103275	0.163313	0.17297	0.123234	0.190044	0.35377
EMD_HUMAN_182_YA	SSLDLSAYPTSSSTS	0.124378	0.206509	0.188486	0.184595	0.138643	0.127514	0.123198
EMD_HUMAN_41	YEKKIFEYETQRRRL	0.222314	0.27696	0.342775	0.303119	0.12914	0.104558	0.258332
EMD_HUMAN_41_YA	AEKKIFEYETQRRRL	0.164293	0.135214	0.196316	0.187903	0.228538	0.11221	0.259988
EMD_HUMAN_59	SSSAASSYSFSDLNS	0.12196	0.0867411	0.100173	0.113834	0.155623	0.137602	0.309279
EMD_HUMAN_74	TRGDADMYDLPKKED	0.900224	0.472673	0.177309	0.426031	1.86935	2.10116	0.607407
EMD_HUMAN_85	KKEDALLYQSKGYND	0.278434	0.468564	0.668989	0.440575	0.869731	0.45012	0.208301
EMD_HUMAN_85_YA	KKEDALLYQSKGAND	0.173958	0.363954	0.36143	0.322705	0.7439	0.207127	0.178927
EMD_HUMAN_94	SKGYNDDYYEESYFT	3.62554	1.63913	2.83905	1.78576	2.23081	1.30677	5.27992
EMD_HUMAN_94_YA	SKGANDDYAEESAFT	0.131154	0.168346	0.169447	0.207767	0.0851941	0.1304	0.393622
EMD_HUMAN_95	KGYNDDYYEESYFTT	3.23838	1.9268	2.2652	1.55813	2.61677	2.37321	5.82806
EMD_HUMAN_95_YA	KGANDDAYEESAFTT	0.170989	0.227282	0.245194	0.200954	0.153578	0.119474	4.0771
EMD_HUMAN_99	DDYYEESYFTTRTYG	3.35709	1.64922	2.34653	1.46638	3.75085	2.75898	5.45859
EMD_HUMAN_99_YA	DDAAEESYFTTRTAG	0.169565	0.243667	0.223412	0.265108	0.12363	0.271014	0.980549
ENOA_HUMAN_287	YKSFIKDYPVVSIED	0.179472	0.119985	0.173918	0.242556	0.202616	0.163449	0.22282
ENOA_HUMAN_287_YA	AKSFIKDYPVVSIED	0.154131	0.194154	0.196636	0.175114	0.162762	0.164302	0.337841
ENOA_HUMAN_44	SGASTGIYEALELRD	3.78214	3.8078	2.86368	3.22465	4.0881	3.87094	3.51224
ENOB_HUMAN_236	TAIQAAGYPDKVVIG	0.137854	0.205583	0.27039	0.163761	0.0930886	0.11976	0.186948
ENOG_HUMAN_236	EAIDKAGYTEKIVIG	0.164657	0.402135	0.187749	0.20481	0.14474	0.166638	0.317852
EP15R_HUMAN_564	AHRSLEQYDQVLDGA	0.136268	0.184132	0.105911	0.103938	0.125041	0.0825733	0.183585
EP15R_HUMAN_74	FLDKQGFYVALRLVA	0.148806	0.244258	1.3525	0.219444	0.229482	0.146257	0.514376
EPHA1_HUMAN_599	DKLWLKPYVDLQAYE	0.231401	0.324805	0.297657	0.307187	0.205966	0.16096	0.336862
EPHA1_HUMAN_599_YA	DKLWLKPYVDLQAAE	0.189901	0.186671	0.236239	0.252823	0.172474	0.136357	0.226027
EPHA1_HUMAN_930	ESIRMKRYILHFHSA	0.143564	0.182367	0.260697	0.177439	0.182437	0.144696	0.235606
EPHA2_HUMAN_594	TYVDPHTYEDPNQAV	3.24415	2.40213	2.2057	2.49231	3.7535	4.61464	3.81947
EPHA2_HUMAN_594_YA	TAVDPHTYEDPNQAV	2.77705	1.65037	1.12128	1.82205	3.51458	2.37029	3.032
EPHA2_HUMAN_628	AGEFGEVYKGMLKTS	0.160322	0.225357	0.227418	0.279088	0.120546	0.133151	0.18069
EPHA2_HUMAN_735	KYLANMNYVHRDLAA	0.128231	0.143986	0.272735	0.161856	0.153304	0.15507	0.138529
EPHA2_HUMAN_735_YA	KALANMNYVHRDLAA	0.134809	0.228976	0.175385	0.184601	0.138497	0.125282	0.126009
EPHA2_HUMAN_772	EDDPEATYTTSGGKI	2.04422	1.54025	1.38032	1.58884	2.05879	1.46846	0.810737
EPHA2_HUMAN_921	ESIKMQQYTEHFMAA	0.160186	0.279372	0.221447	0.167375	0.114476	0.126624	0.17878
EPHA2_HUMAN_930	EHFMAAGYTAIEKVV	0.2375	0.203338	0.3694	0.386256	0.174532	0.187708	0.222797
EPHA2_HUMAN_960	GHQKRIAYSLLGLKD	0.120545	0.212326	0.21353	0.184096	0.127029	0.164445	0.19245
EPHA3_HUMAN_596	KLPGLRTYVDPHTYE	0.562849	0.59287	0.682864	0.904074	1.0364	2.58433	0.20139
EPHA3_HUMAN_596_YA	KLPGLRTYVDPHTAE	0.337824	0.262602	0.286223	0.310866	0.23045	0.509457	0.195095
EPHA3_HUMAN_602	TYVDPHTYEDPTQAV	3.70932	1.76641	1.89166	1.90489	3.7159	3.63509	5.22793
EPHA3_HUMAN_602_YA	TAVDPHTYEDPTQAV	2.72202	1.893	1.1407	1.94437	3.12447	2.70715	2.92655
EPHA3_HUMAN_779	EDDPEAAYTTRGGKI	2.25238	2.54878	2.61368	2.72849	0.321951	0.170097	0.221679
EPHA3_HUMAN_937	EIFTGVEYSSCDTIA	0.355137	0.161323	0.396947	0.514621	0.186478	1.61968	0.67394
EPHA4_HUMAN_602	TYVDPFTYEDPNQAV	3.45588	1.99416	2.25527	4.09516	3.12318	2.72173	4.71018
EPHA4_HUMAN_602_YA	TAVDPFTYEDPNQAV	2.93133	2.158	1.51641	2.28825	3.26417	2.39187	4.17762
EPHA5_HUMAN_650	KLPGVRTYIDPHTYE	0.453095	0.346902	0.334416	0.701925	0.196106	0.975872	0.186362
EPHA5_HUMAN_650_YA	KLPGVRTYIDPHTAE	0.133314	0.194991	0.207297	0.202627	0.108226	0.166426	0.160438
EPHA5_HUMAN_656	TYIDPHTYEDPNQAV	2.83577	2.18274	1.7969	1.82169	2.71525	2.61064	3.21318
EPHA5_HUMAN_656_YA	TAIDPHTYEDPNQAV	2.59396	2.13058	1.16034	2.41525	2.85421	2.17322	1.9894
EPHA5_HUMAN_982	EAIKMGRYTEIFMEN	0.170439	0.190092	0.229407	0.262534	0.103219	0.103055	0.178287
EPHA6_HUMAN_612	TYIDPDTYEDPSLAV	3.03464	1.25944	1.0441	0.859742	3.09516	2.86218	4.84658
EPHA6_HUMAN_612_YA	TAIDPDTYEDPSLAV	3.1845	0.997875	1.04133	1.03846	3.60704	3.4242	4.7228
EPHA6_HUMAN_831	EDDPEAAYTTTGGKI	2.12317	2.35596	2.97887	2.63874	0.208672	0.660549	0.51808
EPHA6_HUMAN_978	DSIKMGQYKNNFVAA	0.0911713	0.107011	0.159914	0.10989	0.0905221	0.16153	0.154339
EPHA7_HUMAN_608	KFPGTKTYIDPETYE	0.226476	0.153542	0.194667	0.363524	0.20943	0.174663	0.284909
EPHA7_HUMAN_608_YA	KFPGTKTYIDPETAE	0.215865	0.29439	0.171466	0.121569	0.146969	0.157677	0.223227
EPHA7_HUMAN_614	TYIDPETYEDPNRAV	2.60362	1.75093	1.25224	1.49223	2.7919	2.63937	4.19711
EPHA7_HUMAN_614_YA	TAIDPETYEDPNRAV	2.42066	2.22806	1.03044	1.67112	2.90351	2.67593	4.52308
EPHA7_HUMAN_791	EDDPEAVYTTTGGKI	3.3407	3.05472	4.0984	3.57276	3.40692	2.99737	3.18087
EPHA8_HUMAN_616	FYAEPHTYEEPGRAG	2.26475	1.32089	1.22751	1.71162	3.68621	3.40107	3.45424
EPHA8_HUMAN_616_YA	FAAEPHTYEEPGRAG	1.28118	1.29322	1.2084	1.8409	3.015	3.22468	2.04104
EPHA8_HUMAN_793	EDDPDAAYTTTGGKI	0.899648	1.11562	1.52186	1.54681	0.164152	0.281995	0.392808
EPHB1_HUMAN_600	IYIDPFTYEDPNEAV	3.76664	1.86946	1.99813	1.56028	3.24331	3.40637	4.84047
EPHB1_HUMAN_600_YA	IAIDPFTYEDPNEAV	2.69831	1.37184	0.613713	1.35684	2.99455	1.2263	4.25959
EPHB1_HUMAN_778	DDTSDPTYTSSLGGK	2.36262	4.98982	2.26011	2.25806	2.49825	0.660126	1.19537
EPHB1_HUMAN_928	SAIKMVQYRDSFLTA	0.148879	0.200576	0.149954	0.171287	0.139612	0.166612	0.192612
EPHB2_HUMAN_780	DDTSDPTYTSALGGK	3.01345	2.78243	2.7348	2.71939	3.15965	1.00245	2.02176
EPHB3_HUMAN_614	VYIDPFTYEDPNEAV	3.06797	1.95636	1.66604	1.80188	3.07209	2.56283	4.74013
EPHB3_HUMAN_614_YA	VAIDPFTYEDPNEAV	2.84677	1.31871	0.689582	1.34384	2.98799	0.972179	4.32948
EPHB3_HUMAN_792	DDPSDPTYTSSLGGK	1.69199	1.72774	2.12773	2.39386	1.7005	0.230566	0.509633
EPHB4_HUMAN_774	ENSSDPTYTSSLGGK	1.13681	1.35853	1.68904	1.57536	1.40581	0.249888	0.209535
EPHB4_HUMAN_987	TGGPAPQYGGGGGGG	0.0862961	0.440698	0.573368	0.14228	0.0716409	0.063727	0.0863112
EPOR_HUMAN_368	SEHAQDTYLVLDKWL	3.4897	2.88856	2.74855	2.67342	3.56999	3.34981	4.75651
EPOR_HUMAN_426	ASAASFEYTILDPSS	0.79914	0.748166	0.599458	1.18729	0.175253	0.104042	1.71318
EPOR_HUMAN_468	DSGISTDYSSGDSQG	0.133013	0.175845	0.239374	0.207112	0.132458	0.133907	0.173822
EPOR_HUMAN_485	GGLSDGPYSNPYENS	2.80262	2.28122	2.48182	2.73069	1.03328	0.466764	1.42726
EPOR_HUMAN_485_YA	GGLSDGPYSNPAENS	0.217063	0.378394	0.360535	0.304306	0.148227	0.170552	0.23239
EPOR_HUMAN_489	DGPYSNPYENSLIPA	2.57492	2.01166	3.0646	2.29508	0.858731	1.46241	1.48488
EPOR_HUMAN_489_YA	DGPASNPYENSLIPA	0.458089	1.80408	1.21316	0.660985	0.159804	0.164948	0.189453
EPOR_HUMAN_504	AEPLPPSYVACSGGG	0.135848	0.489346	0.276445	0.21342	0.154894	0.484273	0.161205
EPS15_HUMAN_849	NFANFSAYPSEEDMI	0.139589	0.176207	0.256848	0.115884	0.119076	0.134152	0.140692
ERBB2_HUMAN_1005	SPLDSTFYRSLLEDD	0.155882	0.16962	0.226005	0.229479	0.178962	0.250761	0.202507
ERBB2_HUMAN_1023	DLVDAEEYLVPQQGF	0.312378	0.196675	0.236787	0.26082	0.157455	2.64293	4.79793
ERBB2_HUMAN_1112	DPSPLQRYSEDPTVP	0.150716	0.186771	0.167061	0.157927	0.0954076	0.120058	0.156849
ERBB2_HUMAN_1139	TCSPQPEYVNQPDVR	0.199864	0.188254	0.327865	0.233465	0.237796	0.194747	0.297758
ERBB2_HUMAN_1196	GAVENPEYLTPQGGA	0.235943	0.313127	0.177022	0.250328	0.130594	2.67601	2.9702
ERBB2_HUMAN_1221	SPAFDNLYYWDQDPP	3.14727	2.97971	2.63122	3.45639	2.93267	0.245769	3.34877
ERBB2_HUMAN_1221_YA	SPAFDNLYAWDQDPP	3.23441	2.52136	2.4501	2.32055	3.85212	0.204888	0.328443
ERBB3_HUMAN_1159	EEEDVNGYVMPDTHL	0.172543	0.251478	0.159532	0.196354	0.212873	0.273934	1.18827
ERBB3_HUMAN_1197	EEDEDEEYEYMNRRR	0.287874	1.92634	0.338719	0.482388	0.62302	0.141583	5.53455
ERBB3_HUMAN_1197_YA	EEDEDEEYEAMNRRR	0.337356	0.589271	0.240859	0.487974	0.343951	0.185693	5.31599
ERBB3_HUMAN_1199	DEDEEYEYMNRRRRH	0.153985	0.511533	0.293376	0.308559	0.41116	0.110846	4.83571
ERBB3_HUMAN_1199_YA	DEDEEAEYMNRRRRH	0.147586	0.169764	0.156681	0.169659	0.17761	0.189004	0.179968
ERBB3_HUMAN_1222	SSLEELGYEYMDVGS	1.79063	0.779071	1.11517	0.920249	0.359943	0.300712	5.11417
ERBB3_HUMAN_1222_YA	SSLEELGYEAMDVGS	0.142565	0.227818	0.224405	0.248713	0.116855	0.134859	1.87657
ERBB3_HUMAN_1260	GTTPDEDYEYMNRQR	0.623238	1.04441	0.412502	0.57202	0.35334	0.158187	4.72245
ERBB3_HUMAN_1260_YA	GTTPDEDYEAMNRQR	0.220642	0.738731	0.203895	0.421011	0.157752	0.109448	3.79585
ERBB3_HUMAN_1262	TPDEDYEYMNRQRDG	0.710316	1.43878	0.463426	0.596748	0.31495	0.20191	4.78667
ERBB3_HUMAN_1262_YA	TPDEDAEYMNRQRDG	0.112397	0.177177	0.389248	0.121429	0.175278	0.182826	0.302071
ERBB3_HUMAN_1276	GGGPGGDYAAMGACP	0.958075	1.69386	1.70056	1.28052	0.182985	2.72137	1.15757
ERBB3_HUMAN_1289	CPASEQGYEEMRAFQ	0.164299	0.180058	0.232637	0.190544	0.139901	0.173398	0.466952
ERBB3_HUMAN_1328	SAFDNPDYWHSRLFP	0.144907	0.207659	0.279179	0.233533	0.144551	1.78484	3.53523
ERBB4_HUMAN_1022	DMMDAEEYLVPQAFN	0.623039	1.49434	0.327617	0.335985	0.443226	2.5867	5.00773
ERBB4_HUMAN_1035	FNIPPPIYTSRARID	2.52099	3.18117	3.4997	3.56301	3.36597	2.59256	0.174889
ERBB4_HUMAN_1056	GHSPPPAYTPMSGNQ	0.125543	0.199924	0.153197	0.163495	0.119536	0.151348	0.186804
ERBB4_HUMAN_1128	EDSSTQRYSADPTVF	0.132997	0.291879	0.286887	0.176843	0.133503	0.109497	0.225887
ERBB4_HUMAN_1150	GELDEEGYMTPMRDK	0.134711	0.180286	0.14835	0.150979	0.441255	2.35737	2.02719
ERBB4_HUMAN_1208	EYVNEPLYLNTFANT	2.97229	2.63625	2.32681	2.15081	3.16832	2.95209	3.20712
ERBB4_HUMAN_1208_YA	EAVNEPLYLNTFANT	3.71272	3.61722	3.52613	2.87227	3.5506	3.60175	2.0802
ERBB4_HUMAN_1221	NTLGKAEYLKNNILS	0.160224	0.214201	0.327842	0.329639	0.159722	0.107838	0.187482
ERBB4_HUMAN_1242	KAFDNPDYWNHSLPP	0.190052	0.249771	0.306842	0.317907	0.138316	0.497548	3.79123
ERBB4_HUMAN_1258	STLQHPDYLQEYSTK	0.286744	0.691094	0.77322	0.530815	0.174337	0.127747	0.197566
ERBB4_HUMAN_1258_YA	STLQHPDYLQEASTK	0.141876	0.187629	0.221959	0.259881	0.140024	0.0965577	0.12734
ERBB4_HUMAN_1284	IVAENPEYLSEFSLK	0.104323	0.20304	0.232409	0.175433	0.0991575	0.376523	0.217057
ERBIN_HUMAN_1104	AQIPEGDYLSYREFH	3.09685	2.68497	2.93103	4.20215	3.3368	3.01108	5.01345
ERBIN_HUMAN_1104_YA	AQIPEGDYLSAREFH	0.369555	0.578086	0.377404	0.452957	0.668558	3.0429	4.25411
ERBIN_HUMAN_920	SKSATLLYDQPLQVF	1.39562	1.14995	1.14697	1.83479	2.70891	3.166	0.239742
ERCC6_HUMAN_932	GANRVVIYDPDWNPS	1.60894	1.31487	1.80078	1.83643	0.832172	0.173272	0.190934
ERN1_HUMAN_628	EHPNVIRYFCTEKDR	0.133957	0.173522	0.206947	0.263393	0.152827	0.154241	0.173251
ERP29_HUMAN_66	KFDTQYPYGEKQDEF	1.10895	0.753461	1.47816	1.22521	0.156261	0.176414	0.135351
ERP29_HUMAN_66_YA	KFDTQAPYGEKQDEF	0.165602	0.163078	0.228072	0.216661	0.167368	0.101534	0.249238
ESR1_HUMAN_219	SIQGHNDYMCPATNQ	0.20902	0.189627	0.228382	0.204574	0.248338	3.26917	3.44099
ESR1_HUMAN_52	DSSKPAVYNYPEGAA	0.164411	0.295559	0.265393	0.284786	0.172649	1.05969	0.179429
ESR1_HUMAN_52_YA	DSSKPAVYNAPEGAA	0.157264	0.381895	0.226573	0.348816	0.170946	1.08311	0.212156
ESR1_HUMAN_537	CKNVVPLYDLLLEML	0.413585	0.360571	0.297224	0.409056	1.47879	0.330414	0.470022
ESR2_HUMAN_36	SIYIPSSYVDSHHEY	1.07412	1.52578	1.62957	1.29849	0.991525	1.9163	0.172292
ESR2_HUMAN_36_YA	SIAIPSSYVDSHHEA	0.13244	0.184341	0.210176	0.231314	0.0991555	0.1151	0.149962
ESYT1_HUMAN_1009	GRDPPDPYVSLLLLP	1.15535	1.39815	1.68539	1.56508	0.126283	0.141335	0.385311
ETS1_HUMAN_223	TDTLQNDYFAIKQEV	0.728893	0.929164	1.58448	0.788013	0.263437	2.01867	4.4527
EZH2_HUMAN_641	KNEFISEYCGEIISQ	0.269173	0.232108	0.27943	0.199595	0.191976	0.15297	1.07483
EZRI_HUMAN_146	KEVHKSGYLSSERLI	0.177764	0.193962	0.203521	0.202013	0.211702	0.185469	0.186222
F16P1_HUMAN_216	IYSLNEGYARDFDPA	3.44532	3.36287	3.13484	2.86048	3.37289	3.39489	0.212989
F16P1_HUMAN_216_YA	IASLNEGYARDFDPA	0.1393	0.187783	0.2495	0.207081	0.100288	0.137017	0.189202
F16P1_HUMAN_245	SAPYGARYVGSMVAD	0.152368	0.344153	0.202992	0.261271	0.127696	0.116559	0.200014
F16P1_HUMAN_245_YA	SAPAGARYVGSMVAD	0.125823	0.273429	0.163845	0.186315	0.117906	0.134779	0.173568
F16P1_HUMAN_265	VYGGIFLYPANKKSP	3.01333	2.5526	2.59843	2.82223	2.91789	0.80569	0.456324
F16P1_HUMAN_265_YA	VAGGIFLYPANKKSP	0.175341	0.141916	0.203103	0.123199	0.191977	0.163	0.328162
F16P2_HUMAN_216	IYSLNEGYAKYFDAA	3.35159	3.05471	3.21041	3.29334	3.09488	3.02055	0.579247
F16P2_HUMAN_216_YA	IASLNEGYAKAFDAA	0.146599	0.179334	0.23235	0.17466	0.116904	0.117797	0.162383
F195B_HUMAN_41	EENVRFIYEAWQGVE	3.10269	2.76217	2.89396	2.65379	3.30379	2.85069	1.78207
FAAA_HUMAN_395	DEVIITGYCQGDGYR	0.164597	0.23482	0.246385	0.161015	0.159449	0.674707	0.317801
FAAA_HUMAN_395_YA	DEVIITGYCQGDGAR	0.212259	0.282833	0.228821	0.21342	0.187976	0.12939	0.306334
FABP4_HUMAN_20	SSENFDDYMKEVGVG	0.10177	0.230365	0.243682	0.180222	0.141368	0.0946211	0.446928
FABP5_HUMAN_131	NVTCTRIYEKVEGGG	0.987494	1.12659	1.26191	1.32246	1.24583	0.887156	0.400012
FABPH_HUMAN_20	DSKNFDDYMKSLGVG	0.12091	0.126308	0.247201	0.222366	0.15287	0.139106	0.244749
FAK1_HUMAN_397	SVSETDDYAEIIDEE	0.200752	0.240545	0.33792	0.183431	0.155255	0.143375	1.59995
FAK1_HUMAN_407	IIDEEDTYTMPSTRD	3.88398	2.59321	3.63411	2.66013	3.92523	3.23369	5.152
FAK1_HUMAN_5	GGGMAAAYLDPNLNH	0.129296	0.17083	0.157877	0.220883	0.133994	2.4421	0.206961
FAK1_HUMAN_570	GDFGLSRYMEDSTYY	2.99028	2.28538	3.22414	2.60498	2.14582	0.326224	1.11658
FAK1_HUMAN_570_YA	GDFGLSRYMEDSTAA	0.245856	0.199712	0.199223	0.197747	0.119732	0.0820186	0.130212
FAK1_HUMAN_577	YMEDSTYYKASKGKL	0.451377	0.988871	1.12013	0.636427	1.76612	1.74985	0.346975
FAK1_HUMAN_577_YA	AMEDSTAYKASKGKL	0.181699	0.16437	0.244574	0.302062	0.122874	0.169011	0.292583
FAK1_HUMAN_925	DRSNDKVYENVTGLV	2.81316	2.75114	2.92024	3.66724	3.65031	2.92234	1.45459
FAK2_HUMAN_402	CSIESDIYAEIPDET	2.69668	1.16239	2.51732	0.67242	3.73965	2.10028	4.02817
FAK2_HUMAN_580	YIEDEDYYKASVTRL	1.73766	2.23982	1.83308	1.78333	1.75656	2.79812	5.16757
FAK2_HUMAN_580_YA	AIEDEDAYKASVTRL	0.35233	0.656858	0.20579	0.604214	0.151575	0.365542	0.176927
FAK2_HUMAN_834	KSLDPMVYMNDKSPL	0.164902	0.237832	0.312441	0.251531	0.12946	0.162646	0.16107
FAK2_HUMAN_849	TPEKEVGYLEFTGPP	2.81851	1.84683	1.80926	2.12379	0.124827	0.659743	0.175975
FAK2_HUMAN_881	DRTDDLVYLNVMELV	3.00083	1.74397	1.85979	1.51186	3.19629	2.76593	4.22917
FAM82A2_HUMAN_176	DAESEGGYTTANAES	0.132162	0.120603	0.181452	0.192188	0.144562	0.0923264	0.153289
FBXO5_HUMAN_142	ALETSRLYEDSGYSS	1.23581	0.873733	0.625222	1.50134	0.888293	0.409281	0.331118
FBXO5_HUMAN_142_YA	ALETSRLYEDSGASS	0.171331	0.319036	0.218244	0.332066	0.140208	0.130121	0.205017
FCERB_HUMAN_219	KVPEDRVYEELNIYS	3.51426	3.36485	3.32293	2.72638	3.28415	2.89443	4.31506
FCERB_HUMAN_219_YA	KVPEDRVYEELNIAS	3.2169	2.50881	2.95038	2.54725	3.38869	2.91215	4.2334
FCERB_HUMAN_225	VYEELNIYSATYSEL	3.91304	3.23201	2.78663	3.05007	4.43401	4.01156	5.54043
FCERB_HUMAN_225_YA	VAEELNIYSATASEL	3.74598	2.89737	2.74413	2.53471	3.77418	3.30537	0.731502
FCERG_HUMAN_65	YEKSDGVYTGLSTRN	3.12948	3.34256	3.49774	3.38193	3.45274	1.22959	0.216625
FCERG_HUMAN_65_YA	AEKSDGVYTGLSTRN	3.19535	3.09655	3.03381	3.50384	3.19501	0.185783	0.246368
FCERG_HUMAN_76	STRNQETYETLKHEK	2.5443	2.46109	2.88876	2.74529	2.9841	0.240886	0.24591
FCG2A_HUMAN_288	YETADGGYMTLNPRA	2.7825	2.87148	2.54458	2.85097	3.20609	3.02893	0.681145
FCG2A_HUMAN_288_YA	AETADGGYMTLNPRA	2.31157	2.36923	2.30525	2.19657	2.93209	2.70189	0.208383
FCG2A_HUMAN_304	TDDDKNIYLTLPPND	3.68028	2.58637	2.63824	4.88237	3.73486	3.92932	13.1179
FCG2B_HUMAN_292	GAENTITYSLLMHPD	1.50598	1.00151	1.36505	1.32415	2.07686	2.0912	0.332439
FCRL3_HUMAN_722	EEDDEENYENVPRVL	0.463775	0.588257	0.192787	0.323727	0.507173	0.182527	4.4951
FCRL6_HUMAN_371	GKDEGVVYSVVHRTS	3.37774	3.68104	3.02331	3.54999	3.60581	3.35892	0.718667
FER_HUMAN_402	EPPPVVNYEEDARSV	0.146247	0.198642	0.224005	0.222345	0.164474	0.122955	0.16613
FER_HUMAN_615	EAKILKQYDHPNIVK	0.141281	0.17603	0.24199	0.173387	0.119519	1.62434	0.129187
FERMT2_HUMAN_193	SKTMTPTYDAHDGSP	0.132785	0.512439	0.147594	0.133478	0.175855	0.114015	0.137184
FGF2_HUMAN_215	KGVCANRYLAMKEDG	0.178372	0.19262	0.204333	0.261625	0.154356	0.149002	0.212254
FGFR1_HUMAN_154	NRMPVAPYWTSPEKM	0.153511	0.198167	0.266446	0.236082	0.160516	0.110807	0.166755
FGFR1_HUMAN_463	MLAGVSEYELPEDPR	1.12086	0.963626	0.512806	1.47794	0.452907	0.950535	4.65299
FGFR1_HUMAN_654	DIHHIDYYKKTTNGR	0.265369	0.311322	0.440515	0.38728	0.190247	0.0888376	0.385006
FGFR1_HUMAN_654_YA	DIHHIDAYKKTTNGR	0.12506	0.208572	0.1512	0.15008	0.187679	0.105548	0.20397
FGFR1_HUMAN_730	SNCTNELYMMMRDCW	2.97278	2.39517	2.50998	2.54642	3.53043	2.91668	2.60031
FGFR1_HUMAN_766	ALTSNQEYLDLSMPL	0.148638	0.244258	0.205629	0.157939	0.0878138	1.06242	3.04304
FGFR2_HUMAN_466	MLAGVSEYELPEDPK	1.11997	1.02093	0.591492	1.24945	0.35568	0.422337	4.39627
FGFR2_HUMAN_657	DINNIDYYKKTTNGR	0.162985	0.214437	0.375089	0.152309	0.120905	0.108809	0.177105
FGFR2_HUMAN_657_YA	DINNIDAYKKTTNGR	0.142139	0.23424	0.204027	0.358297	0.0833729	0.157693	0.158219
FGFR2_HUMAN_769	TLTTNEEYLDLSQPL	0.147524	0.198724	0.188136	0.230397	0.152897	0.486974	4.1752
FGFR3_HUMAN_648	DVHNLDYYKKTTNGR	0.111614	0.198393	0.245059	0.237651	0.130428	0.106945	0.172336
FGFR3_HUMAN_648_YA	DVHNLDAYKKTTNGR	0.109847	0.0965815	0.145902	0.232476	0.102872	0.142851	0.159633
FGFR3_HUMAN_724	ANCTHDLYMIMRECW	2.55057	2.44214	2.74726	2.28996	3.46575	0.678811	0.886295
FGFR3_HUMAN_760	TVTSTDEYLDLSAPF	0.221992	0.365488	0.2932	0.217301	0.203109	1.44494	4.69863
FGFR4_HUMAN_643	GVHHIDYYKKTSNGR	0.14312	0.913923	0.217142	0.367675	0.15069	0.101003	0.198592
FGFR4_HUMAN_643_YA	GVHHIDAYKKTSNGR	0.13324	0.261261	0.142127	0.195334	0.12305	0.125425	0.205449
FGR_HUMAN_34	SYGAADHYGPDPTKA	0.13786	0.167205	0.283519	0.145422	0.101052	0.0884572	0.165518
FGR_HUMAN_34_YA	SAGAADHYGPDPTKA	0.142647	0.165245	0.208258	0.184517	0.119937	0.14754	0.214522
FGR_HUMAN_523	FTSAEPQYQPGDQTG	0.164825	0.248119	0.298509	0.200967	0.142782	0.256536	0.197279
FHIT_HUMAN_114	FHRNDSIYEELQKHD	3.93524	2.71001	3.46233	2.95043	4.27016	4.26854	4.0804
FHIT_HUMAN_145	EAAALRVYFQGGGGG	0.162702	0.362743	0.233147	0.383128	0.172092	0.129636	0.184703
FIP1L1_HUMAN_110	IKTGAPQYGSYGTAP	3.22252	2.68113	2.60777	3.05183	2.58788	2.85467	0.174748
FIP1L1_HUMAN_110_YA	IKTGAPQYGSAGTAP	0.129406	0.286927	0.15741	0.176624	0.150402	0.190113	0.204847
FKBP4_HUMAN_220	KGEHSIVYLKPSYAF	0.223283	0.178258	0.202436	0.158445	0.547116	2.67905	0.277528
FKBP4_HUMAN_220_YA	KGEHSIVYLKPSAAF	0.216634	0.170227	0.241774	0.188689	0.431939	2.74596	0.211551
FLOT1_HUMAN_149	MGISVVSYTLKDIHD	0.154521	0.133926	0.164502	0.208678	0.140195	0.118173	0.194374
FLOT1_HUMAN_160	DIHDDQDYLHSLGKA	0.155616	0.251259	0.208213	0.36307	0.11191	0.131809	1.15247
FLOT1_HUMAN_56	NVKSEKVYTRHGVPI	0.206788	0.178701	0.378635	0.263306	0.261776	0.171378	0.191508
FLOT2_HUMAN_163	DVYDKVDYLSSLGKT	3.582	4.24055	3.09299	2.87457	3.79754	3.55887	2.33318
FLOT2_HUMAN_163_YA	DVADKVDYLSSLGKT	0.14032	0.188871	0.188392	0.192417	0.105622	0.237982	0.171737
FLT3_HUMAN_572	KYKKQFRYESQLQMV	0.202173	0.186771	0.192584	0.267159	0.235119	0.15579	0.210421
FLT3_HUMAN_572_YA	KAKKQFRYESQLQMV	0.28241	0.14786	0.514175	0.263474	0.335751	0.194437	0.201991
FLT3_HUMAN_589_YA	TGSSDNEYFAVDFRE	3.01004	2.65558	2.86141	2.75525	2.34264	2.86804	5.16134
FLT3_HUMAN_591	SSDNEYFYVDFREYE	2.54059	1.26512	1.69407	0.782049	1.75619	2.30156	4.52034
FLT3_HUMAN_591_YA	SSDNEAFYVDFREAE	3.06381	3.65666	3.05069	2.14039	2.90215	1.91245	4.55757
FLT3_HUMAN_599	VDFREYEYDLKWEFP	2.04943	1.81917	1.73266	1.60579	0.546034	0.174089	2.28416
FLT3_HUMAN_599_YA	VDFREAEYDLKWEFP	2.28897	1.97262	1.7298	2.18742	0.721113	0.126893	0.543605
FLT3_HUMAN_726	KEHNFSFYPTFQSHP	0.168718	0.154324	0.16685	0.247568	0.168713	0.12975	0.194726
FLT3_HUMAN_793	EDLLCFAYQVAKGME	0.183928	0.287653	0.231105	0.239588	0.227338	0.127545	0.229598
FLT3_HUMAN_842	DIMSDSNYVVRGNAR	0.157759	0.422772	0.354685	0.289929	0.167758	0.169793	0.180094
FLT3_HUMAN_955	ADAEEAMYQNVDGRV	2.75649	2.6127	2.4364	2.48321	2.07563	2.837	4.42544
FLT3_HUMAN_969	VSECPHTYQNRRPFS	0.187728	0.273996	0.328477	0.236508	0.200461	0.149344	0.221312
FMO5_HUMAN_56	EEGRASIYKSVIINT	0.524082	0.257808	0.378423	0.209152	0.275442	1.53174	0.322732
FNBP1_HUMAN_500	ARRQSGLYDSQNPPT	0.0802954	0.0363968	0.0642435	0.0379158	0.129431	0.136005	0.204302
FOS_HUMAN_10	FSGFNADYEASSSRC	0.269388	0.442935	0.281591	0.340172	0.172455	0.196886	1.7321
FOS_HUMAN_30	AGDSLSYYHSPADSF	0.193762	0.278031	0.145069	0.272561	0.780615	2.86108	2.00042
FOS_HUMAN_30_YA	AGDSLSAYHSPADSF	0.124375	0.183448	0.252735	0.203436	0.128923	2.62468	0.188
FOXP3_HUMAN_342	NMRPPFTYATLIRWA	1.38791	1.79694	1.52668	1.51907	2.9323	0.956959	0.51442
FR1OP_HUMAN_337	GTGEDDDYVDDFNST	0.12487	0.178139	0.148461	0.190554	0.109882	0.14824	4.10883
FRK_HUMAN_387	KVDNEDIYESRHEIK	3.13787	1.37926	1.66096	1.60096	4.01782	3.05797	1.76838
FRS2_HUMAN_196	AEEQVHTYVNTTGVQ	0.155599	0.173074	0.206413	0.200227	0.175404	0.157366	0.159539
FRS2_HUMAN_392	NLDPMHNYVNTENVT	0.112593	0.198792	0.170871	0.163245	0.143871	0.103692	0.152914
FUBP1_HUMAN_268	FREVRNEYGSRIGGN	0.547266	1.5967	0.942318	0.63191	1.31362	0.327707	0.314974
FUBP1_HUMAN_58	TSLNSNDYGYGGQKR	0.361119	0.340975	0.355239	0.269095	0.409206	0.955077	0.0961538
FUBP1_HUMAN_58_YA	TSLNSNDYGAGGQKR	0.130606	0.180286	0.236212	0.135266	0.156043	0.148281	0.184806
FUBP1_HUMAN_625	YYRQQAAYYAQTSPQ	0.225623	0.177944	0.240145	0.232822	0.186992	1.61378	0.204671
FUBP1_HUMAN_625_YA	AARQQAAYAAQTSPQ	0.105053	0.403091	0.249496	0.32013	0.116948	0.188547	0.160199
FUND1_HUMAN_18	YESDDDSYEVLDLTE	2.19467	0.629886	0.753873	0.600739	0.339451	0.197579	5.04631
FUND1_HUMAN_18_YA	AESDDDSYEVLDLTE	0.88693	0.231122	0.189387	0.431804	0.184343	0.14812	3.91679
FXN_HUMAN_118	EDLADKPYTFEDYDV	2.97407	2.3022	1.05102	1.97695	0.271749	0.156639	0.885691
FXN_HUMAN_118_YA	EDLADKPYTFEDADV	2.45315	1.93068	0.312148	1.90706	0.187556	0.177411	0.28904
FXR1_HUMAN_68	EGDEVEVYSRANDQE	1.24151	1.15641	1.81276	1.4009	0.694221	0.210329	0.477883
FXR2_HUMAN_78	EGDEVEVYSRANEQE	1.01339	1.08584	1.55695	1.39527	0.564824	0.265997	0.501705
FYB_HUMAN_559	GRTARGSYGYIKTTA	0.245092	0.303663	0.368832	0.46218	0.708956	0.191967	0.168435
FYB_HUMAN_559_YA	GRTARGSYGAIKTTA	0.392413	0.424117	0.315495	0.353728	0.379797	0.168275	0.199627
FYB_HUMAN_571	TTAVEIDYDSLKLKK	0.332172	1.93753	0.585457	0.647975	1.664	0.16663	0.117321
FYB_HUMAN_595	IEDDQEVYDDVAEQD	0.82656	0.360878	0.429294	0.494772	0.26725	0.154101	3.48294
FYB_HUMAN_755	CRNEEGKYGYVLRSY	0.705515	1.21226	0.658385	1.12598	0.861074	0.311941	0.318902
FYB_HUMAN_755_YA	CRNEEGKYGAVLRSA	1.21839	1.98778	1.12914	4.39688	1.90414	0.221447	0.242571
FYB_HUMAN_757	NEEGKYGYVLRSYLA	2.03683	2.04459	1.70863	2.22974	2.5806	1.0987	0.215157
FYB_HUMAN_757_YA	NEEGKAGYVLRSALA	0.0943473	0.147289	0.0988539	0.0797679	0.130854	0.138362	0.195743
FYB_HUMAN_771	ADNDGEIYDDIADGC	2.86307	1.61691	1.94187	1.2403	2.53839	1.33498	3.89703
FYB_HUMAN_780	DIADGCIYDNDGGGG	2.67227	2.37333	2.34042	2.51108	1.39246	0.201441	0.256072
FYN_HUMAN_185	SETTKGAYSLSIRDW	0.138844	0.219737	0.201342	0.219941	0.170742	0.114562	0.155461
FYN_HUMAN_28	SLNQSSGYRYGTDPT	0.123651	0.196118	0.500682	0.234581	0.184585	0.176899	0.16415
FYN_HUMAN_28_YA	SLNQSSGYRAGTDPT	0.122168	0.177091	0.143545	0.163355	0.138356	0.163214	0.204143
FYN_HUMAN_30	NQSSGYRYGTDPTPQ	0.137323	0.176162	0.215997	0.265945	0.131665	0.132578	0.155046
FYN_HUMAN_30_YA	NQSSGARYGTDPTPQ	0.106082	0.14455	0.144619	0.167314	0.109954	0.12292	0.140639
FYN_HUMAN_39	TDPTPQHYPSFGVTS	0.139238	0.177927	0.236313	0.179512	0.139465	0.102982	0.115795
FYN_HUMAN_531	FTATEPQYQPGENLG	0.148188	0.166052	0.182478	0.249926	0.135491	2.14084	0.183418
G3BP1_HUMAN_133	VHNDIFRYQDEVFGG	0.105769	0.144835	0.20432	0.142062	0.145945	0.171374	0.150447
G3BP1_HUMAN_56	GKPADAVYGQKEIHR	2.65894	2.66788	2.94485	2.37266	3.64827	0.227506	0.218897
G3P_HUMAN_42	DPFIDLNYMVYMFQY	0.678573	0.440386	0.635712	0.521325	0.280479	0.804112	0.661108
G3P_HUMAN_42_YA	DPFIDLNYMVAMFQA	0.15278	0.248125	0.237734	0.166666	0.191357	0.213212	0.780217
G6B_HUMAN_211	DQEPSLLYADLDHLA	3.69319	2.95424	4.06383	2.81528	4.30605	3.74249	1.03219
G6PD_HUMAN_428	DLTYGNRYKNVKLPD	0.185648	0.265326	0.315275	0.258866	0.196697	0.122749	0.175871
G6PD_HUMAN_428_YA	DLTAGNRYKNVKLPD	0.118318	0.242159	0.1514	0.179324	0.126327	0.138835	0.177637
G6PD_HUMAN_503	MKRVGFQYEGTYKWV	2.04017	1.70701	1.49693	1.74158	0.740934	0.556638	0.599145
G6PD_HUMAN_503_YA	MKRVGFQYEGTAKWV	0.188753	0.178177	0.22633	0.229645	0.107626	0.148707	0.322333
G6PD_HUMAN_507	GFQYEGTYKWVNPHK	2.44357	2.14489	2.64388	2.3558	2.70927	3.08251	0.78993
G6PD_HUMAN_507_YA	GFQAEGTYKWVNPHK	0.816592	1.11345	0.937276	1.24896	0.745909	1.48928	0.313764
GAB1_HUMAN_242	FFQQQMIYDSPPSRA	3.64237	4.05551	5.26964	3.62453	3.64868	3.62049	0.96245
GAB1_HUMAN_259	ASVDSSLYNLPRSYS	2.41239	2.80389	2.50554	2.42266	3.02838	3.3798	0.439723
GAB1_HUMAN_259_YA	ASVDSSLYNLPRSAS	1.63041	2.10466	1.7002	1.82159	2.16941	3.31897	0.232416
GAB1_HUMAN_285	TEADGELYVFNTPSG	2.39299	1.95646	1.33665	2.65812	1.16896	2.13168	3.43649
GAB1_HUMAN_373	ASDTDSSYCIPTAGM	0.133403	0.235098	0.236278	0.207948	0.10885	3.07466	3.35237
GAB1_HUMAN_406	DASSQDCYDIPRAFP	0.998987	0.595842	0.896617	0.511262	3.18699	3.69383	4.58252
GAB1_HUMAN_447	SEELDENYVPMNPNS	0.130478	0.228284	0.180108	0.218271	0.108795	0.137053	3.98926
GAB1_HUMAN_472	EPIQEANYVPMTPGT	0.147142	0.166189	0.161039	0.173898	0.147139	0.221793	1.18291
GAB1_HUMAN_589	SHDSEENYVPMNPNL	0.156158	0.201104	0.227924	0.227714	0.118612	0.417728	4.33159
GAB1_HUMAN_627	KGDKQVEYLDLDLDS	0.17715	0.149505	0.202777	0.194334	0.144538	0.118481	0.309069
GAB1_HUMAN_659	VADERVDYVVVDQQK	0.129886	0.153423	0.194066	0.208222	0.136566	0.409783	2.08339
GAB2_HUMAN_266	TEFRDSTYDLPRSLA	3.2678	3.19836	2.56621	2.87944	3.69844	3.25061	0.827608
GAB2_HUMAN_293	ETDNEDVYTFKTPSN	3.95134	3.30314	3.37801	2.97937	3.29834	0.260474	0.773876
GAB2_HUMAN_452	STNSEDNYVPMNPGS	0.151899	0.155101	0.19928	0.14575	0.150026	0.105584	2.60128
GAB2_HUMAN_614	KSTGSVDYLALDFQP	0.528756	0.237361	0.475406	0.52658	0.271938	2.63655	2.67583
GAB2_HUMAN_643	TSDEKVDYVQVDKEK	0.117916	0.248036	0.238295	0.212061	0.185731	0.129492	0.363386
GARE1_HUMAN_105	DIKEPVQYFNSVEEV	0.168836	0.301568	0.332293	0.131933	0.181989	0.381652	0.221668
GAS6_HUMAN_683	SAPVTAFYRGCMTLE	0.282938	0.313657	0.183441	0.240395	0.213554	0.167835	0.417887
GBB2_HUMAN_239	VAFFPNGYAFTTGSD	0.149842	0.190854	0.184939	0.226674	0.116333	0.157517	0.210162
GBF1_HUMAN_1316	DVSLDRGYTSDSEVY	2.58348	2.59178	3.27551	2.81651	1.80604	0.165968	0.158444
GBF1_HUMAN_1316_YA	DVSLDRGYTSDSEVA	0.142175	0.192739	0.172146	0.221126	0.130028	0.104094	0.146519
GBG12_HUMAN_42	ASADLMSYCEEHARS	0.147258	0.243795	0.200353	0.169766	0.115021	0.15577	0.171057
GBRB2_HUMAN_441	YDASSIQYRKAGLPR	0.125383	0.317302	0.242378	0.217301	0.133846	0.278084	0.15641
GBRB2_HUMAN_441_YA	ADASSIQYRKAGLPR	0.131407	0.203441	0.215013	0.199714	0.101793	0.13245	0.114366
GCSAM_HUMAN_107	GNSAEEYYENVPCKA	3.26992	2.21614	2.35358	2.51164	3.64772	2.93292	4.93033
GCSAM_HUMAN_107_YA	GNSAEEAYENVPCKA	1.37913	1.16079	0.901584	1.37585	2.15082	0.1931	4.41489
GCSAM_HUMAN_148	ARSPEDEYELLMPHR	3.03623	2.77189	2.58016	2.47901	3.30842	2.8987	4.59245
GDIR2_HUMAN_24	ELDSKLNYKPPPQKS	0.100175	0.149004	0.228968	0.212007	0.111686	0.114208	0.190456
GELS_HUMAN_409	TDGLGLSYLSSHIAN	0.128022	0.249976	0.195138	0.175399	0.157398	0.116849	0.187915
GELS_HUMAN_465	VPVDPATYGQFYGGD	3.64672	3.93199	2.69225	2.84612	4.15125	2.17735	0.268023
GELS_HUMAN_465_YA	VPVDPATYGQFAGGD	3.19011	4.13959	2.85342	2.96824	3.28841	0.34773	0.162982
GELS_HUMAN_651	ALGGKAAYRTSPRLK	0.243309	0.301817	0.178538	0.239145	0.234746	0.135591	0.218984
GELS_HUMAN_86	VPVPTNLYGDFFTGD	3.34652	2.17149	2.0399	2.59349	4.31038	1.18827	0.221537
GIT1_HUMAN_224	ERLVECQYELTDRLA	0.58548	0.482331	0.339368	0.869608	0.200688	0.267932	0.48187
GIT1_HUMAN_321	FLPVNPEYSATRNQG	0.0977833	0.125141	0.109395	0.210189	0.103219	0.447399	0.155016
GIT1_HUMAN_383	DLDDQHDYDSVASDE	0.173784	0.26183	0.178626	0.260044	0.206346	0.169513	3.44866
GIT1_HUMAN_545	ELEDDAIYSVHVPAG	3.55795	3.40421	2.9923	3.33897	3.49128	3.65836	4.9091
GIT1_HUMAN_554	VHVPAGLYRIRKGVS	0.120594	0.180899	0.184297	0.16551	0.155567	0.16018	0.177503
GIT2_HUMAN_224	ERLVEIQYELTDRLA	0.287937	0.339118	0.29226	0.451259	0.190284	0.493759	0.435743
GIT2_HUMAN_484	KQATTNVYQVQTGSE	0.584367	1.08263	0.546181	1.20029	0.224007	0.105785	0.172708
GJA1_HUMAN_265	KDCGSQKYAYFNGCS	0.506142	0.334381	0.945767	0.629446	0.236932	1.68872	0.245864
GJA1_HUMAN_265_YA	KDCGSQKYAAFNGCS	1.13782	0.81157	1.67071	1.34529	0.249022	1.4461	0.249967
GLNA_HUMAN_104	VLCEVFKYNRRPAET	0.196457	0.18906	0.302541	0.257804	0.168553	0.210418	0.244359
GNAT1_HUMAN_142	CFERASEYQLNDSAG	0.278018	0.391764	0.295091	0.435603	0.188035	0.304763	0.219157
GNB2L1_HUMAN_194	NHIGHTGYLNTVTVS	0.171445	0.210562	0.259329	0.244374	0.152149	0.101158	0.204933
GNMT_HUMAN_34	AARVWQLYIGDTRSR	0.307689	0.292637	0.261755	0.272188	0.425876	0.352139	0.765286
GOLI4_HUMAN_613	EDNVDEQYQEEAEEE	0.171746	0.366561	0.295732	0.30205	0.12543	0.138637	0.209459
GPC5C_HUMAN_414	TLRAEDMYSAQSHQA	0.207584	0.699932	0.531209	0.725001	0.189867	0.16962	0.189819
GPD1L_HUMAN_328	FPLFTAVYQICYESR	0.894249	0.722503	1.19515	1.04616	0.393416	0.285427	0.575152
GPD1L_HUMAN_328_YA	FPLFTAVYQICAESR	2.08909	1.80018	1.9435	2.01938	1.52358	0.564409	0.601034
GPDA_HUMAN_326	FPLFMAVYKVCYEGQ	0.318716	0.376569	0.413882	0.428297	0.334836	0.264391	0.780719
GPDA_HUMAN_326_YA	FPLFMAVYKVCAEGQ	0.429615	0.350981	0.276772	0.862763	0.359673	0.230431	0.591891
GPDM_HUMAN_601	TARKFLYYEMGYKSR	1.17593	1.31186	1.29008	0.553985	2.14449	0.752251	1.02801
GPDM_HUMAN_601_YA	TARKFLAYEMGAKSR	0.230638	0.301095	0.398993	0.237623	0.265421	0.172449	0.227823
GPX1_HUMAN_98	EILNSLKYVRPGGGF	0.150644	0.15775	0.220388	0.146726	0.150995	0.118737	0.213054
GRAP2_HUMAN_45	ELGSQEGYVPKNFID	0.212124	0.134187	0.182897	0.180462	0.148343	0.123512	0.213385
GRASP_HUMAN_237	VVKDPSIYDTLESVR	3.32889	2.6231	2.78134	3.21254	3.28227	3.35823	0.38242
GRB10_HUMAN_67	NASLESLYSACSMQS	3.0245	2.78405	3.13006	2.68868	3.45645	4.07786	0.186073
GRB2_HUMAN_209	TGMFPRNYVTPVNRN	0.10203	0.15318	0.189452	0.230583	0.126411	0.607775	0.130847
GRB2_HUMAN_37	EECDQNWYKAELNGK	0.172976	0.205731	0.26344	0.287124	0.137175	0.122749	0.188338
GRB2_HUMAN_52	DGFIPKNYIEMKPHP	0.174401	0.148539	0.175067	0.19032	0.123155	0.0999369	0.189452
GRB2_HUMAN_7	GMEAIAKYDFKATAD	0.16917	0.289036	0.16126	0.239364	0.147841	0.125549	0.167654
GRB7_HUMAN_188	FRKNFAKYELFKSSP	0.156833	0.0696152	0.114958	0.228212	0.0897728	0.23085	0.223009
GRB7_HUMAN_338	AAFRLFKYGVQLYKN	0.143371	0.156704	0.19959	0.165693	0.127111	0.106358	0.138376
GRB7_HUMAN_338_YA	AAFRLFKYGVQLAKN	0.138575	0.156124	0.226096	0.167216	0.110153	0.0994197	0.163139
GRIA2_HUMAN_876	YKEGYNVYGIESVKI	3.47329	2.07777	3.86786	2.80394	4.83874	1.50625	0.404922
GRIA2_HUMAN_876_YA	AKEGANVYGIESVKI	2.21189	7.79255	2.27843	2.1598	1.1974	0.152695	0.202115
GRIA3_HUMAN_887	YREGYNVYGTESVKI	2.7862	1.80107	2.1592	1.90013	3.63694	1.85674	0.164122
GRIA3_HUMAN_887_YA	AREGANVYGTESVKI	0.823835	1.41032	1.22447	1.16259	0.70271	0.153222	0.208992
GRIN2A_HUMAN_1105	CSEVERTYLKTKSSS	0.209714	0.139276	0.22701	0.115412	0.132289	0.171392	0.287661
GRIN2A_HUMAN_1118	SSPRDKIYTIDGEKE	3.05255	2.9018	2.46176	3.13152	1.08138	0.118766	0.192637
GRIN2A_HUMAN_1184	GLSNNDQYKLYSKHF	0.146368	0.243009	0.591179	0.231665	0.22427	0.214712	0.201367
GRIN2A_HUMAN_1184_YA	GLSNNDQYKLASKHF	0.131491	0.149155	0.245195	0.17816	0.1807	0.128693	0.175982
GRIN2A_HUMAN_1187	NNDQYKLYSKHFTLK	0.187282	0.238382	0.182381	0.199666	0.144662	0.189404	0.188032
GRIN2A_HUMAN_1187_YA	NNDQAKLYSKHFTLK	0.116301	0.176581	0.244467	0.211958	0.141579	0.112516	0.175245
GRIN2A_HUMAN_1246	CLRMGNLYDIDEDQM	1.96765	1.33908	0.335162	1.35523	0.614428	0.279274	0.447502
GRIN2A_HUMAN_1423	SRGHNDVYISEHVMP	0.241043	0.234345	0.386839	0.43174	0.169793	0.168268	0.170231
GRIN2A_HUMAN_943	SDKGNLMYSDNRSFQ	0.233229	0.237626	0.377043	0.421948	0.248993	1.98173	0.126731
GRM1B_HUMAN_389	NFSVDKLYDLLFTNS	3.07349	2.10405	2.5155	2.54729	5.15708	3.39645	0.84445
GSDMD_HUMAN_37	SSTGFQPYCLVVRKP	0.27999	0.645381	0.826396	0.527319	2.09881	0.218856	0.382948
GSTP1_HUMAN_199	AFLASPEYVNLPING	1.276	1.48991	1.88035	1.22616	3.15982	3.31264	3.73828
GSTP1_HUMAN_4	GGGGMPPYTVVYFPV	1.55409	1.41315	1.52804	2.23994	1.12853	1.22963	1.00588
GSTP1_HUMAN_4_YA	GGGGMPPYTVVAFPV	0.231567	0.461998	0.498742	0.499762	0.190081	0.198798	0.368299
GSTP1_HUMAN_8	MPPYTVVYFPVRGRC	0.202952	0.224744	0.403306	0.244915	0.171446	0.186965	0.195017
GSTP1_HUMAN_8_YA	MPPATVVYFPVRGRC	0.11609	0.201721	0.190525	0.184305	0.126455	0.125238	0.193689
GTF2I_HUMAN_248	EESEDPDYYQYNIQA	3.15833	1.91072	2.23325	2.33292	0.525947	1.02286	4.49217
GTF2I_HUMAN_248_YA	EESEDPDYAQANIQA	0.225786	0.332515	0.251572	0.437911	0.183023	0.482371	4.50123
GTF2I_HUMAN_249	ESEDPDYYQYNIQAG	3.53201	2.46241	2.6683	2.59683	1.71034	2.61919	5.38896
GTF2I_HUMAN_249_YA	ESEDPDAYQANIQAG	0.153738	0.20177	0.180477	0.206785	0.155346	0.127476	0.209234
GTF2I_HUMAN_318	VTIEDDDYSPPSKRP	0.205624	0.33183	0.286684	0.281467	0.352603	0.757121	4.67045
GTF2I_HUMAN_503	EAHPNDLYVEGLPEN	0.427027	0.411321	0.323618	0.457848	0.186362	0.167473	0.249056
GUCY1B3_HUMAN_192	ESKEEDFYEDLDRFE	3.199	1.03144	0.781397	0.873519	2.63897	0.170432	4.6744
H2AX_HUMAN_143	ATQASQEYGGGGGGG	0.138923	0.465933	0.242937	0.437927	0.121879	0.1561	0.21398
H2B1B_HUMAN_84	EASRLAHYNKRSTIT	0.14579	0.213577	0.311525	0.25283	0.129781	0.181656	0.158962
H31_HUMAN_42	GVKKPHRYRPGTVAL	0.398724	0.375558	0.489957	0.528072	0.638161	0.403303	0.210498
H3C_HUMAN_41	CGVKPHRYRPGTVAL	0.198833	0.232626	0.23456	0.196522	0.254531	0.15954	0.236497
H4_HUMAN_52	KRISGLIYEETRGVL	3.00526	2.67983	2.63677	2.71259	3.49874	3.07332	0.46502
H4_HUMAN_89	VTAMDVVYALKRQGR	0.355014	1.03549	1.23613	0.548296	2.02298	1.15428	0.158429
HAP28_HUMAN_70	SEDEEDDYQQKRKGV	0.151706	0.221726	0.27055	0.223029	0.132534	0.142197	0.219817
HAVR2_HUMAN_265	IRSEENIYTIEENVY	3.04373	2.77043	3.36287	4.5847	3.21018	0.224331	0.197831
HAVR2_HUMAN_265_YA	IRSEENIYTIEENVA	3.28002	2.66162	3.41067	3.28765	3.63383	0.103005	0.205324
HBA_HUMAN_25	VGAHAGEYGAEALER	0.120631	0.339099	0.205833	0.2374	0.153554	0.169187	0.172228
HCK_HUMAN_209	TLDNGGFYISPRSTF	0.172636	0.153518	0.239425	0.307549	1.66007	2.3339	0.257569
HCK_HUMAN_51	ASPHCPVYVPDPTST	0.29998	0.32276	0.260805	0.315631	0.15559	0.150231	0.211841
HCK_HUMAN_522	YTATESQYQQQPGGG	0.125718	0.2429	0.16995	0.172525	0.105	0.343706	0.159748
HCK_HUMAN_522_YA	ATATESQYQQQPGGG	0.123946	0.205761	0.179957	0.252857	0.123377	0.136672	0.196615
HCLS1_HUMAN_140	KSAVGFDYKGEVEKH	0.1138	0.165685	0.363402	0.209663	0.227272	0.10249	0.15658
HCLS1_HUMAN_198	AKGFGGQYGIQKDRV	0.137296	0.203145	0.174377	0.208315	0.202189	0.13556	0.195783
HCLS1_HUMAN_222	MEAPTTAYKKTTPIE	0.126344	0.171949	0.190156	0.209103	0.121302	0.0943906	0.241798
HCLS1_HUMAN_378	EPEPENDYEDVEEMD	0.18262	2.14634	0.141078	0.140033	0.194944	0.172004	2.4571
HCLS1_HUMAN_397	EDEPEGDYEEVLEPE	0.164418	0.217393	0.189128	0.237456	0.154174	0.127645	3.84642
HCRTR1_HUMAN_358	SAANPIIYNFLSGKF	1.90991	1.59108	2.05106	1.75869	3.34956	3.3072	0.259864
HCST_HUMAN_86	AQEDGKVYINMPGRG	1.00319	0.736551	0.694658	0.481564	0.960693	0.802131	0.338274
HDAC2_HUMAN_222	IGAGKGKYYAVNFPM	0.443898	0.279063	0.596435	0.261665	0.909709	2.16895	0.4292
HDAC2_HUMAN_222_YA	IGAGKGKYAAVNFPM	0.398453	0.279731	0.364222	0.302282	0.679052	0.409614	0.254149
HDAC6_HUMAN_570	SSNFDSIYICPSTFA	2.51206	2.01987	2.53238	2.10654	3.08724	2.54699	3.41048
HGS_HUMAN_216	VRVCEPCYEQLNRKA	2.39056	3.89825	1.46047	1.76857	3.44992	2.29273	0.900608
HGS_HUMAN_308	APPASSLYSSPVNSS	0.348075	0.371278	0.795455	0.524511	1.98874	3.32373	0.233556
HGS_HUMAN_329	IDPELARYLNRNYWE	0.127517	0.203939	0.246068	0.256951	0.234887	0.191621	0.234475
HGS_HUMAN_329_YA	IDPELARYLNRNAWE	0.135259	0.238613	0.16126	0.216559	0.121389	0.131805	0.175632
HGS_HUMAN_334	ARYLNRNYWEKKQEE	0.1272	0.0953149	0.232637	0.149569	0.136266	0.120784	0.184069
HGS_HUMAN_334_YA	ARALNRNYWEKKQEE	0.111188	0.145165	0.203844	0.149671	0.113941	0.110851	0.18924
HIPK2_HUMAN_361	SKAVCSTYLQSRYYR	0.250024	0.490767	0.327554	0.290483	0.240441	0.52632	0.198503
HIPK2_HUMAN_361_YA	SKAVCSTYLQSRAAR	0.155915	0.28969	0.139667	0.310098	0.156425	0.171386	0.213104
HIPK3_HUMAN_359	SKTVCSTYLQSRYYR	0.21317	0.294297	0.380333	0.374019	0.175343	0.544403	0.274271
HIPK3_HUMAN_359_YA	SKTVCSTYLQSRAAR	0.161813	0.237218	0.260279	0.250862	0.206073	0.205605	0.241126
HLA-A_HUMAN_344	SDRKGGSYSQAASSD	0.130418	0.160537	0.194879	0.196829	0.102315	0.16148	0.172416
HLA-B_HUMAN_344	SGGKGGSYSQAACSD	0.122965	0.273615	0.193562	0.433547	0.154369	0.131487	0.212831
HLTF_HUMAN_195	SGRAGPSYSMPVHAA	0.115866	0.198682	0.138223	0.222131	0.104918	1.85945	0.162276
HMGN5_HUMAN_76	EAVVEEDYNENAKNG	0.340778	0.159876	0.150104	0.179192	0.185803	0.117027	0.35559
HNF4A_HUMAN_144	ISTRRSSYEDSSLPS	0.139991	0.276602	0.247412	0.233885	0.121595	0.113618	0.13192
HNF4A_HUMAN_23	SAALDPAYTTLEFEN	3.00974	2.38694	2.53238	2.75824	0.994248	0.521811	0.792299
HNF4A_HUMAN_288	IDDNEYAYLKAIIFF	0.288585	0.264954	0.211531	0.357717	0.382617	0.483576	0.745324
HNF4A_HUMAN_288_YA	IDDNEAAYLKAIIFF	0.201029	0.17357	0.266148	0.179787	0.222826	0.387632	0.41269
HNRH1_HUMAN_246	GYGGYDDYNGYNDGY	2.88763	1.79058	5.69092	2.45997	0.484921	0.499647	4.31718
HNRH1_HUMAN_246_YA	GAGGADDYNGANDGA	0.125885	0.258234	0.153988	0.303997	0.137581	0.102398	0.210051
HNRH2_HUMAN_246	GYGGYDDYGGYNDGY	3.45066	2.7304	3.32245	3.21412	3.55837	1.24396	4.09725
HNRH2_HUMAN_246_YA	GAGGADDYGGANDGA	0.138692	0.344537	0.140081	0.244981	0.136933	0.107539	0.177867
HNRH3_HUMAN_296	GMDNQGGYGSVGRMG	2.83753	3.09143	2.48029	2.74368	3.34656	1.72525	0.147328
HNRNPK_HUMAN_225	IKGRAQPYDPNFYDE	0.222949	0.263458	0.359094	0.381186	0.258395	0.131805	0.229013
HNRNPK_HUMAN_225_YA	IKGRAQPYDPNFADE	0.117428	0.196015	0.210684	0.16472	0.158128	0.0942462	0.189207
HNRNPK_HUMAN_236	FYDETYDYGGFTMMF	2.2904	1.21303	2.26302	1.30967	2.59538	0.907894	1.32274
HNRNPK_HUMAN_236_YA	FADETADYGGFTMMF	1.40608	1.14294	1.39747	1.18388	0.750105	0.369408	0.603337
HNRNPK_HUMAN_72	IKALRTDYNASVSVP	0.13615	0.210997	0.201313	0.14154	0.120923	0.121487	0.144598
HNRPK_HUMAN_380	YAGGRGSYGDLGGPI	0.20849	0.212448	0.331493	0.28293	0.193753	1.12068	0.13518
HNRPK_HUMAN_380_YA	AAGGRGSYGDLGGPI	0.143506	0.215131	0.155388	0.231355	0.1518	0.110933	0.154336
HOIL1_HUMAN_330	CPFIDNTYSCSGKLL	3.23239	3.4704	2.69629	2.9902	3.34551	2.65161	1.06541
HRAS_HUMAN_137	AQDLARSYGIPYIET	0.157848	0.201706	0.136246	0.101427	0.102411	1.07527	0.204121
HRAS_HUMAN_137_YA	AQDLARSYGIPAIET	0.197065	0.178954	0.182936	0.257239	0.117693	0.147836	0.216738
HRAS_HUMAN_64	DTAGQEEYSAMRDQY	0.445408	0.66232	0.897862	0.846446	0.260386	0.483782	1.93481
HRAS_HUMAN_64_YA	DTAGQEEYSAMRDQA	0.225137	0.454411	0.361295	0.411143	0.156654	0.199386	0.743383
HRAS_HUMAN_96	SFEDIHQYREQIKRV	0.145331	0.213026	0.234283	0.209897	0.117062	0.163318	0.132185
HS74L_HUMAN_89	TERIRLPYELQKMPN	0.14238	0.159636	0.278475	0.208719	0.158537	0.130754	0.222104
HS90A_HUMAN_313	NEEYGEFYKSLTNDW	3.44028	2.33709	2.84217	2.39757	3.97581	3.26606	3.15254
HS90A_HUMAN_313_YA	NEEAGEFYKSLTNDW	0.236051	0.314103	0.460893	0.465834	0.391645	1.17834	0.297712
HS90A_HUMAN_492	KENQKHIYYITGETK	2.07078	1.16064	2.24795	2.40716	1.26532	1.08517	0.437815
HS90A_HUMAN_492_YA	KENQKHIYAITGETK	2.46479	1.6604	4.2775	3.10569	1.74255	3.38661	0.205779
HS90B_HUMAN_484	KETQKSIYYITGESK	1.76496	1.53092	2.08445	2.52131	0.849233	0.875128	0.231856
HS90B_HUMAN_484_YA	KETQKSIYAITGESK	2.36286	1.87082	2.96702	2.48424	1.73297	3.61504	0.254134
HSP74_HUMAN_336	KLKKEDIYAVEIVGG	3.11481	1.78583	2.28082	2.33228	4.16632	2.68646	0.287091
HSP74_HUMAN_660	EDTENWLYEDGEDQP	0.232164	0.222891	0.262822	0.302615	0.179425	0.115854	0.566063
HSP74_HUMAN_89	AEKSNLAYDIVQLPT	0.363466	0.384904	0.3799	0.526349	0.320925	0.272784	0.286591
HSP90AA1_HUMAN_38	SLIINTFYSNKEIFL	0.185974	0.256058	0.1932	0.219606	0.598724	0.189011	0.322681
HSP90AB1_HUMAN_301	DDITQEEYGEFYKSL	3.66365	2.77992	3.45666	2.89553	3.76858	2.47271	3.45129
HSP90AB1_HUMAN_301_YA	DDITQEEYGEFAKSL	3.73796	2.56683	3.94937	2.677	3.76515	0.785888	0.395974
I12R2_HUMAN_800	DLPTHDGYLPSNIDD	0.142188	0.17235	0.217546	0.225461	0.132818	0.141836	0.165374
ICK_HUMAN_159	SKPPYTDYVSTRWYR	0.55569	1.16964	1.42421	1.0203	0.712318	2.70311	0.42114
ICK_HUMAN_159_YA	SKPPATDYVSTRWAR	0.165666	0.42866	0.237615	0.207266	0.164966	0.75787	0.183458
ICP22_HHV2H_189	AWTLDLHYIRQCVNQ	0.183094	0.293925	0.213994	0.238707	0.234546	0.162739	0.554456
IDHC_HUMAN_42	VELDLHSYDLGIENR	0.269266	0.503198	0.248643	0.421241	0.122678	0.137828	0.176488
IF2P_HUMAN_134	AKPKVEMYSGSDDDD	0.130721	0.30622	0.227661	0.29973	0.143239	0.107178	0.242778
IF6_HUMAN_113	NVTTCNDYVALVHPD	0.565366	0.505622	0.665	0.539112	0.250947	1.09107	2.52114
IFITM3_HUMAN_20	NSGQPPNYEMLKEEH	0.108165	0.333054	0.203697	0.242625	0.14011	0.132358	0.380369
IFNB_HUMAN_24	TTALSMSYNLLGFLQ	0.176312	0.248185	0.28203	0.188475	0.242444	0.131334	0.219434
IGF1R_HUMAN_1280	GFREVSFYYSEENKL	0.289697	0.208419	0.289651	0.285467	0.217648	0.227073	0.490156
IGF1R_HUMAN_1280_YA	GFREVSFYASEENKL	0.157533	0.207591	0.286414	0.6505	0.165978	0.120763	0.184441
IGF1R_HUMAN_1281	FREVSFYYSEENKLP	0.253792	0.322037	0.305286	0.645148	0.381857	0.241638	0.578933
IGF1R_HUMAN_1281_YA	FREVSFAYSEENKLP	0.121101	0.214008	0.227388	0.13358	0.118983	0.118658	0.275208
IGF1R_HUMAN_980	YASVNPEYFSAADVY	3.27034	2.57797	2.80764	2.72261	3.31897	3.63533	4.85065
IGF1R_HUMAN_980_YA	AASVNPEYFSAADVA	0.173821	0.196951	0.193331	0.220594	0.178264	2.45843	2.20771
IKBA_HUMAN_42	DSMKDEEYEQMVKEL	0.194382	0.311448	0.215617	0.230206	0.138883	0.127987	3.61144
IKBKB_HUMAN_188	SFVGTLQYLAPELLE	0.14965	0.26704	0.334641	0.252896	0.12601	2.70292	0.252002
IKBKB_HUMAN_199	ELLEQQKYTVTVDYW	0.2201	0.252549	0.277207	0.210334	0.171386	0.126179	0.32004
IKBKB_HUMAN_199_YA	ELLEQQKYTVTVDAW	0.186303	0.218169	0.191212	0.159765	0.175409	0.183701	0.308397
IL1R1_HUMAN_496	ELEKIQDYEKMPESI	0.119745	0.294588	0.191467	0.142075	0.132664	0.110312	4.66639
IL2RB_HUMAN_381	EIEACQVYFTYDPYS	1.84822	1.29121	2.03963	1.9532	1.84722	0.897746	2.02723
IL2RB_HUMAN_381_YA	EIEACQVYFTADPAS	2.0617	1.92448	3.03265	2.36419	0.50325	0.604996	1.22313
IL2RB_HUMAN_384	ACQVYFTYDPYSEED	3.09469	2.3836	2.52307	2.28454	2.06277	0.427986	1.18773
IL2RB_HUMAN_384_YA	ACQVAFTYDPASEED	0.190308	0.247815	0.496525	0.24789	0.11054	0.134208	0.290492
IL2RB_HUMAN_387	VYFTYDPYSEEDPDE	2.85195	1.91997	1.91947	1.93631	1.80022	0.225679	0.652543
IL2RB_HUMAN_387_YA	VAFTADPYSEEDPDE	0.668564	0.61249	0.192652	0.723922	0.183192	0.12327	0.199366
IL3RB_HUMAN_766	VKSGFEGYVELPPIE	0.163155	0.192593	0.168996	0.232715	0.142452	0.125325	0.268495
IL4RA_HUMAN_497	VIAGNPAYRSFSNSL	0.122381	0.235352	0.259095	0.170379	0.158466	0.203047	0.19452
IL4RA_HUMAN_575	VSAPTSGYQEFVHAV	0.159692	0.215029	0.287772	0.209858	0.144867	0.971964	0.188735
IL4RA_HUMAN_603	GPPGEAGYKAFSSLL	0.137684	0.248658	0.169889	0.194849	0.149594	0.279069	0.157112
IL4RA_HUMAN_631	ASSGEEGYKPFQDLI	0.180105	0.195146	0.306971	0.290756	0.137675	0.12567	0.209467
IMA4_HUMAN_484	AFEIIDQYFSGDDID	0.263597	0.272821	0.268291	0.396622	0.229964	0.230989	2.0566
IMDH2_HUMAN_400	TTEAPGEYFFSDGIR	0.338067	0.280444	0.191123	0.458458	0.0420309	2.26111	5.12189
INAR1_HUMAN_466	VFLRCINYVFFPSLK	0.208956	0.25549	0.331735	0.263422	0.217515	0.661356	2.61153
INAR2_HUMAN_512	DVDLGDGYIMRGGGG	0.16114	0.280829	0.240649	0.297968	0.131979	0.136095	0.193551
INP4A_HUMAN_355	DGGSDQNYDIVTIGA	0.327916	0.441152	0.379982	0.543332	0.40393	1.21312	2.77254
INSR_HUMAN_1011	DVFPCSVYVPDEWEV	1.45481	0.800594	0.411354	0.941096	0.294719	0.194556	0.416073
INSR_HUMAN_1185	FGMTRDIYETDYYRK	2.92332	2.31163	2.46901	1.98409	3.20631	1.63636	2.34806
INSR_HUMAN_1185_YA	FGMTRDIYETDAARK	1.96688	1.79483	1.72305	1.57434	1.82728	0.191735	0.230651
INSR_HUMAN_1190	DIYETDYYRKGGKGL	2.17396	1.09155	1.34285	1.3201	2.72402	0.347517	0.24764
INSR_HUMAN_1190_YA	DIAETDAYRKGGKGL	0.111041	0.323377	0.190986	0.199355	0.147358	0.124951	0.187564
INSR_HUMAN_1355	SLGFKRSYEEHIPYT	0.136878	0.217435	0.152464	0.182377	0.13579	0.108597	0.182149
INSR_HUMAN_1355_YA	SLGFKRSYEEHIPAT	0.10206	0.249167	0.179721	0.151896	0.139423	0.137491	0.179114
INSR_HUMAN_1361	SYEEHIPYTHMNGGK	0.14501	0.230555	0.291916	0.201892	0.173101	0.157798	0.174909
INSR_HUMAN_1361_YA	SAEEHIPYTHMNGGK	0.126921	0.197316	0.233223	0.164758	0.118524	0.123604	0.163793
INSR_HUMAN_401	YLKIRRSYALVSLSF	0.172946	0.382591	0.272459	0.17432	0.148007	0.14907	0.188158
INSR_HUMAN_401_YA	ALKIRRSYALVSLSF	0.14088	0.226352	0.176351	0.187164	0.204909	0.140864	0.246285
INSR_HUMAN_992	DGPLGPLYASSNPEY	1.7462	1.23131	1.94061	1.9562	2.64353	3.5577	0.520105
INSR_HUMAN_992_YA	DGPLGPLYASSNPEA	0.576093	0.673911	0.750142	1.13733	1.13027	2.5935	0.195419
INSR_HUMAN_999	YASSNPEYLSASDVF	1.34655	0.957799	0.312296	0.924411	0.836429	3.12619	2.89467
INSR_HUMAN_999_YA	AASSNPEYLSASDVF	0.393397	1.0459	0.352982	0.302986	0.188384	3.22123	0.982737
INSRR_HUMAN_1141	FGMTRDVYETDYYRK	2.31662	2.14495	2.11755	1.90507	2.42741	1.39293	2.07585
INSRR_HUMAN_1141_YA	FGMTRDVYETDAARK	0.477268	0.908639	0.595933	0.973196	0.230838	0.141837	0.146884
INSRR_HUMAN_1146	DVYETDYYRKGGKGL	1.52301	1.55042	1.36383	1.50657	1.9317	0.220916	0.256809
INSRR_HUMAN_1146_YA	DVAETDAYRKGGKGL	0.152604	0.177392	0.208861	0.223399	0.156753	0.141145	0.620477
IQGA1_HUMAN_172	APQIQDLYGKVDFTE	3.29875	3.18875	2.86141	2.90393	3.05406	1.55263	0.180663
IQGA3_HUMAN_162	APQIHDLYGKVKFTA	3.57606	2.56674	2.69971	2.64108	4.45503	0.662253	0.230547
IRS1_HUMAN_1179	GLENGLNYIDLDLVK	0.160389	0.203306	0.268381	0.181882	0.146788	0.313915	3.20821
IRS1_HUMAN_1229	SSEDLSAYASISFQK	2.63277	2.35191	2.46451	2.69524	2.98538	2.46609	0.455778
IRS1_HUMAN_465	GEEELSNYICMGGKG	0.238696	0.205274	0.235214	0.303752	0.230976	0.7308	3.51761
IRS1_HUMAN_612	TLHTDDGYMPMSPGV	0.129622	0.225215	0.213657	0.203995	0.155875	0.145661	0.310452
IRS1_HUMAN_632	GRKGSGDYMPMSPKS	0.228954	0.225544	0.236871	0.26434	0.412935	0.536501	0.300031
IRS1_HUMAN_896	EPKSPGEYVNIEFGS	0.177419	0.161951	0.275144	0.251402	0.132499	0.421582	1.6677
IRS1_HUMAN_941	EETGTEEYMKMDLGP	0.42859	0.371432	0.396349	0.516837	0.224112	0.24177	4.00137
IRS1_HUMAN_989	VPSSRGDYMTMQMSC	0.0879437	0.0163919	0.0174483	0.0155962	0.141731	1.23039	0.277349
IRS2_HUMAN_1253	GFQNGLNYIAIDVRE	0.144584	0.181302	0.204791	0.174382	0.177441	0.428824	0.260124
IRS2_HUMAN_540	GGGGGEFYGYMTMDR	2.04708	1.49127	1.77337	1.79222	2.79019	3.65114	0.521879
IRS2_HUMAN_540_YA	GGGGGEFYGAMTMDR	2.92057	3.26938	2.61228	2.65668	3.38802	3.28637	0.212676
IRS2_HUMAN_653	NLGADDGYMPMTPGA	0.118221	0.204061	0.299704	0.200186	0.152915	0.124238	0.218175
IRS2_HUMAN_675	GSCRSDDYMPMSPAS	0.188479	0.182556	0.291378	0.202131	0.17436	0.227829	3.14048
IRS2_HUMAN_919	EPKSPGEYINIDFGE	0.154083	0.19793	0.211353	0.144399	0.116239	0.239927	1.74258
IRS4_HUMAN_921	EADSSSDYVNMDFTK	2.19989	1.22779	1.81561	1.10188	0.290527	1.92451	4.54393
ISLR2_HUMAN_719	EFEAGSEYSDRLPLG	0.538959	1.54572	0.828348	0.988714	0.263262	1.2441	1.89375
IST1_HUMAN_43	ARKEIADYLAAGKDE	0.149396	0.226496	0.281768	0.187224	0.153458	0.200697	0.225877
ITB1_HUMAN_783	DTGENPIYKSAVTTV	0.156356	0.250025	0.531482	0.291376	0.216374	2.91886	0.18547
ITB3_HUMAN_773	DTANNPLYKEATSTF	0.123719	0.212059	0.249075	0.335978	0.184391	1.62878	0.153145
ITB3_HUMAN_785	STFTNITYRGTGGGG	0.0989581	0.228436	0.158255	0.200827	0.0873588	0.144901	0.185807
ITB7_HUMAN_778	KQDSNPLYKSAITTT	0.124088	0.265642	0.172676	0.232307	0.127386	0.14612	0.126855
ITGB7_HUMAN_753	YRLSVEIYDRREYSR	0.345002	0.682721	0.63094	0.32188	2.88821	0.511399	0.368836
ITGB7_HUMAN_753_YA	ARLSVEIYDRREASR	0.413091	1.10444	0.734478	0.804361	2.45838	0.539819	0.308868
ITGB7_HUMAN_758	EIYDRREYSRFEKEQ	4.62184	2.16343	2.68821	2.48792	3.8372	2.11964	0.163991
ITGB7_HUMAN_758_YA	EIADRREYSRFEKEQ	0.11891	0.240381	0.283954	0.188352	0.140468	0.100809	0.150309
ITK_HUMAN_180	ETVVIALYDYQTNDP	0.685554	0.499472	0.435699	0.765835	0.45417	0.276782	0.582807
ITK_HUMAN_180_YA	ETVVIALYDAQTNDP	0.15006	0.186168	0.231499	0.252762	0.126514	0.123504	0.151703
ITPR1_HUMAN_2664	KVKDSTEYTGPESYV	0.143432	0.236582	0.158202	0.236354	0.14401	0.154733	0.675519
ITPR1_HUMAN_2664_YA	KVKDSTEYTGPESAV	0.164854	0.152904	0.254136	0.22722	0.159654	0.154225	0.220792
ITPR1_HUMAN_353	NAQEKMVYSLVSVPE	2.89757	2.6979	2.84054	2.82285	2.37439	2.45276	0.27232
ITPR1_HUMAN_482	KLLEDLVYFVTGGTN	3.01282	2.37213	2.72739	2.72633	2.47447	2.05309	2.17962
ITPR2_HUMAN_2607	KVKDPTEYTGPESYV	0.186241	0.753854	0.199497	0.240263	0.139317	0.164597	0.441562
ITPR2_HUMAN_2607_YA	KVKDPTEYTGPESAV	0.1455	0.193946	0.209276	0.243258	0.145783	0.163085	0.225439
ITSN2_HUMAN_553	EYQNKLIYLVPEKQL	2.1848	2.25682	2.38399	2.95048	2.7574	3.29	0.483752
ITSN2_HUMAN_553_YA	EAQNKLIYLVPEKQL	1.03235	1.44456	1.25351	1.84314	1.86714	3.01138	0.339126
JAK1_HUMAN_1034	AIETDKEYYTVKDDR	1.28571	1.48916	1.6599	1.55797	0.370233	0.205644	4.13557
JAK1_HUMAN_1034_YA	AIETDKEYATVKDDR	0.277786	0.408402	0.658203	0.501755	0.15491	0.209813	0.296542
JAK1_HUMAN_1035	IETDKEYYTVKDDRD	0.418566	0.623675	0.935307	0.904368	0.0858705	0.0895648	4.72344
JAK1_HUMAN_1035_YA	IETDKEAYTVKDDRD	0.194919	0.243881	0.244934	0.229306	0.132724	0.154164	0.248526
JAK1_HUMAN_3	GGGGGMQYLNIKEDC	0.124093	0.173627	0.24189	0.245555	0.119791	0.0858761	0.171238
JAK2_HUMAN_1007	VLPQDKEYYKVKEPG	0.20134	0.224309	0.297518	0.186122	0.138564	0.165361	2.94347
JAK2_HUMAN_1007_YA	VLPQDKEYAKVKEPG	0.158086	0.212919	0.269245	0.21152	0.181269	0.141843	0.221377
JAK2_HUMAN_119	VLYRIRFYFPRWYCS	0.109385	0.199529	0.20535	0.223012	0.0873846	0.0970679	0.126299
JAK2_HUMAN_119_YA	VLARIRFYFPRWACS	0.120846	0.277804	0.164192	0.336137	0.148721	0.141896	0.15012
JAK2_HUMAN_372	FVSLIDGYYRLTADA	1.0592	1.43961	1.04162	1.40383	0.289238	0.796667	1.23007
JAK2_HUMAN_372_YA	FVSLIDGYARLTADA	0.0925639	0.262846	0.115745	0.205841	0.154064	0.380259	0.220518
JAK2_HUMAN_373	VSLIDGYYRLTADAH	0.528317	0.881166	0.657506	0.734215	0.164898	0.722429	0.41826
JAK2_HUMAN_373_YA	VSLIDGAYRLTADAH	0.167764	0.413252	0.276498	0.344336	0.121489	0.144444	0.260224
JAK2_HUMAN_570	VRREVGDYGQLHETE	0.741617	1.00997	1.33944	0.996324	0.186643	0.14018	0.198485
JAK2_HUMAN_813	NSLFTPDYELLTEND	1.60326	1.05431	0.690505	0.944878	0.156643	0.150264	4.26258
JAK2_HUMAN_868	GSVEMCRYDPLQDNT	0.208439	0.232505	0.217268	0.289502	0.166906	0.187018	0.28575
JAK2_HUMAN_972	EYLGTKRYIHRDLAT	0.154672	0.275345	0.21257	0.218271	0.134736	0.110382	0.224955
JAK2_HUMAN_972_YA	EALGTKRYIHRDLAT	0.144083	0.181913	0.180553	0.144528	0.156308	0.131632	0.183298
JAK3_HUMAN_785	NSLISSDYELLSDPT	1.87866	1.8943	1.33838	2.67085	0.240414	0.399915	4.54323
JAK3_HUMAN_904	SLRLVMEYLPSGCLR	0.231358	0.262233	0.703679	0.218712	0.238556	0.224964	0.474406
JUNB_HUMAN_182	GPEPPPVYTNLSSYS	2.71262	2.62526	2.51209	2.42696	3.65966	3.50963	0.315121
JUNB_HUMAN_182_YA	GPEPPPVYTNLSSAS	2.12079	1.84079	2.37986	2.05878	2.11479	3.39779	0.201337
JUNB_HUMAN_188	VYTNLSSYSPASASS	1.12534	1.61408	3.89048	1.3279	1.91371	2.4894	0.126799
JUNB_HUMAN_188_YA	VATNLSSYSPASASS	0.135829	0.307805	0.167815	0.185906	0.14762	0.133352	0.363652
JUP_HUMAN_133	AIVHLINYQDDAELA	0.0999382	0.234588	0.212423	0.45084	0.198939	0.12966	0.142165
JUP_HUMAN_550	AAGTQQPYTDGVRME	0.173216	0.285367	0.270524	0.216548	0.119999	0.136804	0.184308
K1C18_HUMAN_36	VSSAASVYAGAGGSG	0.463279	1.39018	1.61837	1.09221	0.485516	0.214147	0.144379
K2C8_HUMAN_228	INFLRQLYEEEIREL	0.229983	0.256592	0.552034	0.202501	0.139262	0.157464	0.25807
KAPCA_HUMAN_331	DTSNFDDYEEEEIRV	0.164042	0.313941	0.368594	0.206039	0.305173	0.151633	3.51919
KAPCB_HUMAN_331	DTSNFDDYEEEDIRV	0.20247	0.170682	0.151698	0.132557	0.169049	0.148766	3.91647
KAPCB_HUMAN_69	KHKATEQYYAMKILD	1.08209	1.00296	1.95816	1.15564	1.95431	2.30434	1.47654
KAPCB_HUMAN_69_YA	KHKATEQYAAMKILD	0.572031	0.237522	0.715268	0.324524	1.00938	2.48024	0.274852
KAT6A_HUMAN_899	SSAPQEQYGECGEKS	0.771267	0.338133	0.939088	0.702341	0.153912	1.37161	0.180755
KCC2A_HUMAN_13	CTRFTEEYQLFEELG	2.426	1.14138	1.17695	0.655656	0.337784	2.29597	3.14586
KCC2B_HUMAN_17	FTDEYQLYEDIGKGA	3.79494	2.36255	2.57096	1.89493	3.6491	3.7903	5.38538
KCC2B_HUMAN_17_YA	FTDEAQLYEDIGKGA	3.49355	3.38101	3.07051	2.94541	3.6228	1.75343	4.29476
KCNA3_HUMAN_162	SFDAILYYYQSGGRI	0.421092	0.39293	0.485158	0.527166	0.353398	1.26066	0.7981
KCNA3_HUMAN_162_YA	SFDAILAYAQSGGRI	0.140671	0.154821	0.171687	0.207391	0.118878	0.146105	0.17384
KCNA3_HUMAN_163	FDAILYYYQSGGRIR	0.173056	0.38711	0.294688	0.331506	0.23306	1.21925	0.431389
KCNA3_HUMAN_163_YA	FDAILAAYQSGGRIR	0.134243	0.19461	0.196752	0.24441	0.123874	0.150882	0.167105
KCNA3_HUMAN_187	FSEEIRFYQLGEEAM	2.94073	3.31818	2.05334	3.10043	0.198514	0.149272	0.227716
KCNA3_HUMAN_499	EGEEQSQYMHVGSCQ	0.784372	0.807708	0.573514	1.13462	0.791518	2.27831	3.41117
KCNB1_HUMAN_128	YWGIDEIYLESCCQA	3.79225	2.56346	2.94284	2.31702	4.14707	3.19693	5.5495
KCNB1_HUMAN_128_YA	AWGIDEIYLESCCQA	3.21585	2.28731	2.37948	2.13201	3.18695	3.23133	4.88912
KCND3_HUMAN_108	GKLHYPRYECISAYD	0.634395	0.505628	1.08372	0.564214	0.960584	1.59952	1.56971
KCND3_HUMAN_108_YA	GKLHAPRYECISAAD	0.375074	0.522313	0.398081	0.354887	0.724709	1.53059	0.389731
KCND3_HUMAN_136	GDCCYEEYKDRKREN	3.35844	2.87143	2.91678	2.70851	3.23215	0.384421	4.46944
KCND3_HUMAN_136_YA	GDCCAEEYKDRKREN	0.169062	0.149517	0.151025	0.191446	0.135995	0.14142	0.213316
KCNJ1_HUMAN_337	SKTKEGKYRVDFHNF	0.154748	0.184825	0.220427	0.29019	0.177499	0.108424	0.160983
KCNJ4_HUMAN_234	YMTQEGEYLPLDQRD	1.88443	1.09715	0.994316	1.98304	1.45196	2.5768	4.2123
KCNJ4_HUMAN_234_YA	AMTQEGEYLPLDQRD	0.902771	0.479941	0.435897	1.30237	0.484313	1.6275	3.20398
KCNN1_HUMAN_109	KRKRLSDYALIFGMF	0.127933	0.16045	0.218693	0.180546	0.105986	0.142191	0.13339
KCNN2_HUMAN_160	TELSWGAYDKASLYS	0.858551	0.530101	0.669778	0.606611	2.0415	0.222546	0.230642
KCNN2_HUMAN_160_YA	TELSWGAYDKASLAS	0.238838	0.317567	0.331396	0.657883	0.261441	0.157544	0.150844
KCRB_HUMAN_125	GDDLDPNYVLSSRVR	0.180296	0.444217	0.326394	0.393193	0.161314	0.160125	1.82195
KCRS_HUMAN_255	ARGIWHNYDKTFLIW	0.255667	0.216343	0.22693	0.200564	0.241206	0.150337	0.2905
KDM1A_HUMAN_135	ANLSEDEYYSEEERN	0.364572	0.324514	0.278823	0.313934	0.147737	0.184688	3.99573
KDM1A_HUMAN_135_YA	ANLSEDEYASEEERN	0.117496	0.182026	0.250898	0.319689	0.117538	0.1444	0.207723
KDM3A_HUMAN_1114	ITPEDRKYGTTNLHL	0.167741	0.137132	0.181846	0.241801	0.141039	0.112297	0.153429
KDM5A_HUMAN_1595	VLDIPSKYDWSGAEE	0.139962	0.244698	0.239228	0.211348	0.201484	0.160288	0.224759
KHDR1_HUMAN_387	YEGYEGYYSQSQGDS	3.16687	2.85156	2.82223	3.07384	2.21406	1.69859	3.15377
KHDR1_HUMAN_387_YA	AEGAEGAYSQSQGDS	0.168636	0.213296	0.327062	0.324639	0.146258	0.135056	0.182684
KHDR1_HUMAN_435	ARPVKGAYREHPYGR	0.456506	0.515371	0.452541	0.49109	0.53201	0.303346	0.259808
KHDR1_HUMAN_435_YA	ARPVKGAYREHPAGR	0.350533	0.262949	0.523918	0.290773	0.70351	0.43182	0.379009
KHDR1_HUMAN_440	GAYREHPYGRYGGGG	3.58334	3.90309	4.20273	3.56245	3.92027	1.80418	0.274274
KHDR1_HUMAN_440_YA	GAAREHPYGRAGGGG	0.576756	1.4555	0.448038	2.22359	0.187486	0.13976	0.170653
KHSRP_HUMAN_317	GFGDRNEYGSRIGGG	0.966846	2.70428	1.48115	1.41927	2.07435	0.173821	0.365758
KHSRP_HUMAN_583	WAAYYSHYYQQPPGP	2.00002	1.66508	1.5453	1.88434	1.58891	1.80712	2.22249
KHSRP_HUMAN_583_YA	WAAAASHYAQQPPGP	0.154299	0.662985	0.187269	0.330457	0.146011	1.37102	0.229795
KHSRP_HUMAN_688	YYRQQAAYYGQTPGP	0.888085	1.35689	1.76537	1.38162	0.188979	2.39466	0.203133
KHSRP_HUMAN_688_YA	AARQQAAYAGQTPGP	0.126677	0.295013	0.191351	0.165426	0.120352	0.142137	0.163209
KI67_HUMAN_1552	VSGEKNIYAFMGTPV	4.02138	2.76182	3.02105	2.68194	3.53329	3.14628	0.476166
KIRR1_HUMAN_605	MKDPTNGYYNVRAHE	0.168739	0.338534	0.247412	0.248278	0.20179	0.47998	1.01111
KIRR1_HUMAN_605_YA	MKDPTNGYANVRAHE	0.154748	0.112823	0.26675	0.277661	0.123026	0.16438	0.196172
KIRR1_HUMAN_606	KDPTNGYYNVRAHED	0.415508	0.156054	0.160682	0.28456	0.14973	0.187602	1.65058
KIRR1_HUMAN_606_YA	KDPTNGAYNVRAHED	0.174541	0.254263	0.309776	0.25818	0.153193	0.111118	0.142771
KIRR1_HUMAN_724	ERTPYEAYDPIGKYA	3.49661	2.75619	2.96768	2.64215	4.19866	3.50533	4.85912
KIRR1_HUMAN_724_YA	ERTPAEAYDPIGKAA	0.177033	0.406073	0.692237	0.277016	1.42551	0.132767	0.302525
KIT_HUMAN_547	VMILTYKYLQKPMYE	0.215178	0.254949	0.280169	0.263003	0.220633	0.171803	0.377693
KIT_HUMAN_547_YA	VMILTAKYLQKPMAE	0.160481	0.179589	0.170599	0.158211	0.181907	0.0908363	0.165183
KIT_HUMAN_553	KYLQKPMYEVQWKVV	0.25232	0.265735	0.299698	0.210286	0.288655	1.05878	0.526007
KIT_HUMAN_553_YA	KALQKPMYEVQWKVV	0.193141	0.236341	0.298127	0.224629	0.295988	1.45916	0.433072
KIT_HUMAN_568	EEINGNNYVYIDPTQ	1.08261	0.550182	0.527153	0.812469	0.640176	1.8503	5.15112
KIT_HUMAN_568_YA	EEINGNNYVAIDPTQ	0.149577	0.12019	0.148927	0.169997	0.131782	0.230217	2.45008
KIT_HUMAN_570	INGNNYVYIDPTQLP	2.27839	2.41795	2.07424	1.30563	3.64727	3.20307	4.93534
KIT_HUMAN_570_YA	INGNNAVYIDPTQLP	2.42706	2.3392	2.66079	1.92078	3.15897	2.86709	2.44483
KIT_HUMAN_703	DHAEAALYKNLLHSK	0.173968	0.0965919	0.0978489	0.0840364	0.176555	0.395741	0.210644
KIT_HUMAN_721	CSDSTNEYMDMKPGV	0.248739	0.29285	0.281591	0.205837	0.262402	0.59579	2.68625
KIT_HUMAN_730	DMKPGVSYVVPTKAD	0.10471	0.196855	0.148651	0.317349	0.123333	1.3428	0.154073
KIT_HUMAN_823	DIKNDSNYVVKGNAR	0.10532	0.117459	0.155287	0.167071	0.15358	0.135317	0.198881
KIT_HUMAN_900	EHAPAEMYDIMKTCW	1.62185	0.496239	0.564572	0.553948	0.993475	1.23893	0.564317
KIT_HUMAN_936	SESTNHIYSNLANCS	2.79719	2.85613	2.71446	2.90036	2.81382	2.19949	0.329317
KLC1_HUMAN_449	DGTSFGEYGGWYKAC	2.84655	2.44382	2.45365	2.24271	3.4337	3.26602	0.852885
KLC1_HUMAN_449_YA	DGTSFGEYGGWAKAC	1.56942	2.01489	2.19726	1.73075	3.23834	2.83647	0.280467
KLC4_HUMAN_449	GGTPYAEYGGWYKAC	3.1456	3.22317	2.92429	2.5229	3.87788	3.44882	0.821321
KLC4_HUMAN_449_YA	GGTPAAEYGGWAKAC	0.173681	0.527081	0.491129	0.382783	0.682409	0.706834	0.153667
KLH22_HUMAN_466	YLKETHCYDPGSNTW	0.251432	0.235521	0.278882	0.21508	0.192316	0.17427	0.42557
KLH22_HUMAN_466_YA	ALKETHCYDPGSNTW	0.196399	0.355707	0.341555	0.418923	0.189959	0.125494	0.177427
KPCA_HUMAN_658	SDFEGFSYVNPQFVH	0.125944	0.181837	0.180596	0.201298	0.124882	2.52243	0.745108
KPCB_HUMAN_662	NEFAGFSYTNPEFVI	0.167531	0.181021	0.20141	0.177705	0.154162	0.42874	0.405516
KPCD_HUMAN_155	IKQAKIHYIKNHEFI	0.136041	0.176329	0.262869	0.200709	0.241489	0.147907	0.246023
KPCD_HUMAN_313	SSEPVGIYQGFEKKT	4.31021	2.31234	2.39516	8.12629	3.56987	3.31432	0.240674
KPCD_HUMAN_334	MQDNSGTYGKIWEGS	3.63317	2.51069	2.54841	2.50232	3.5151	0.643515	0.2195
KPCD_HUMAN_374	ELKGRGEYFAIKALK	0.307152	0.443444	0.487247	0.275381	1.64575	2.64585	4.12998
KPCD_HUMAN_567	IRVDTPHYPRWITKE	0.22528	0.14914	0.2293	0.323321	0.399106	0.198666	0.208404
KPCD_HUMAN_64	STFDAHIYEGRVIQI	3.12845	2.89281	2.82068	3.03758	3.60043	2.81263	0.152938
KPCD1_HUMAN_432	KEGWMVHYTSKDTLR	0.154831	0.209514	0.233214	0.172696	0.139689	0.227974	0.181366
KPCD1_HUMAN_463	NDTGSRYYKEIPLSE	0.167497	0.267777	0.14545	0.147511	0.107311	0.166917	0.185047
KPCD1_HUMAN_463_YA	NDTGSRAYKEIPLSE	0.123562	0.100132	0.1867	0.20702	0.114032	0.167028	0.171804
KPCD1_HUMAN_502	TTANVVYYVGENVVN	2.0462	2.45765	1.90588	2.46885	0.770837	2.54299	0.234112
KPCD1_HUMAN_502_YA	TTANVVAYVGENVVN	0.128693	0.213119	0.211453	0.248048	0.127461	0.109057	0.116514
KPCD1_HUMAN_95	KFPECGFYGMYDKIL	3.72463	2.3357	2.98868	3.28667	3.80025	2.36254	0.427143
KPCD1_HUMAN_95_YA	KFPECGFYGMADKIL	0.843237	0.379146	0.420904	0.469525	1.12594	0.605689	0.310322
KPCD2_HUMAN_438	NNTTNRYYKEIPLSE	0.0933898	0.141093	0.127654	0.161265	0.112887	0.0980526	0.588683
KPCD2_HUMAN_438_YA	NNTTNRAYKEIPLSE	0.145127	0.206843	0.230241	0.261183	0.118563	0.126602	0.207302
KPCD2_HUMAN_717	SVVGTPAYLAPEVLL	0.125977	0.250397	0.519156	0.28456	0.128498	2.89162	0.186147
KPCG_HUMAN_675	ADFQGFTYVNPDFVH	0.631675	0.391492	0.345021	0.740767	0.56458	3.13203	2.19328
KPCT_HUMAN_90	SETTVELYSLAERCR	2.06651	2.37273	1.62571	2.27162	2.71512	2.56176	0.407956
KPYM_HUMAN_105	FASDPILYRPVAVAL	0.170077	0.268124	0.217844	0.215239	0.635772	2.86523	0.164614
KPYM_HUMAN_148	KITLDNAYMEKCDEN	0.208884	0.191872	0.348222	0.30614	0.184958	0.159866	0.260581
KPYM_HUMAN_175	VEVGSKIYVDDGLIS	0.237205	0.297957	0.339901	0.486138	0.157246	0.156681	0.136842
KPYR_HUMAN_148	FAGSPLSYRPVAIAL	0.136178	0.203541	0.218321	0.142449	0.150152	0.162024	0.193832
KS6A3_HUMAN_529	TITKTVEYLHAQGVV	0.130804	0.229414	0.248153	0.156315	0.285978	0.15168	0.186865
KSYK_HUMAN_131	KENLIREYVKQTWNL	0.147521	0.125641	0.249739	0.26772	0.291059	0.130543	0.239144
KSYK_HUMAN_28	TREEAEDYLVQGGMS	0.176522	0.161523	0.21404	0.179621	0.148101	0.104116	2.33333
KSYK_HUMAN_296	IISRIKSYSFPKPGH	0.103666	0.224982	0.223242	0.191759	0.111898	0.107797	0.123473
KSYK_HUMAN_323	STVSFNPYEPELAPW	3.24461	2.89665	3.06671	2.84377	1.47172	0.165079	0.252869
KSYK_HUMAN_352	TEVYESPYADPEEIR	2.76104	1.8166	2.01032	1.90356	3.1745	2.68902	5.86019
KSYK_HUMAN_352_YA	TEVAESPYADPEEIR	3.82875	3.48662	2.71035	2.80775	4.76284	3.10042	4.22632
KSYK_HUMAN_364	EIRPKEVYLDRKLLT	0.119317	0.364827	0.171865	0.194346	0.262193	0.134521	0.138941
KSYK_HUMAN_507	VLLVTQHYAKISDFG	0.555306	0.753005	0.975993	0.833667	1.11638	2.6095	0.529127
KSYK_HUMAN_525	ALRADENYYKAQTHG	0.132134	0.200204	0.247296	0.316805	0.170731	0.443528	0.651452
KSYK_HUMAN_525_YA	ALRADENYAKAQTHG	0.143756	0.216587	0.245173	0.228147	0.148691	0.811853	0.319271
KSYK_HUMAN_546	YAPECINYYKFSSKS	0.268215	0.232314	0.151519	0.18907	0.37061	0.780745	0.370209
KSYK_HUMAN_546_YA	AAPECINYAKFSSKS	0.15769	0.172191	0.0800375	0.112895	0.203266	0.867941	0.325502
KSYK_HUMAN_629	VELRLRNYYYDVVNG	0.246448	0.313046	0.247666	0.232989	0.302709	0.172337	0.442
KSYK_HUMAN_629_YA	VELRLRNYAADVVNG	0.155418	0.212682	0.185157	0.20321	0.182331	0.129831	0.315238
KSYK_HUMAN_630	ELRLRNYYYDVVNGG	1.02342	0.655365	0.724918	0.792866	2.0928	0.364032	1.22106
KSYK_HUMAN_630_YA	ELRLRNAYADVVNGG	0.23076	0.294506	0.232575	0.212949	0.129697	0.145253	0.217624
L1CAM_HUMAN_1176	KDETFGEYRSLESDN	0.254754	0.21876	0.234953	0.211751	0.123603	1.49658	0.301042
LAIR1_HUMAN_251	GSSQEVTYAQLDHWA	3.08036	1.69484	2.09154	1.81584	3.71777	3.23604	3.18573
LANC2_HUMAN_198	DLPDELLYGRAGYLY	3.56141	3.1846	3.17087	3.59584	3.84055	3.28046	0.279521
LANC2_HUMAN_198_YA	DLPDELLYGRAGALA	3.11767	4.09042	2.83817	3.12264	3.20416	3.56339	0.228468
LARP1_HUMAN_777	TVPESPNYRNTRTPR	0.178869	0.236625	0.199335	0.262329	0.152102	0.121059	0.200635
LASP1_HUMAN_171	IPTSAPVYQQPQQQP	0.148992	0.276685	0.286868	0.307786	0.811823	3.0313	0.176759
LAT_HUMAN_110	GANSVASYENEGASG	0.178002	0.177919	0.254031	0.202708	0.139988	0.149726	0.344178
LAT_HUMAN_156	ADEDEDDYHNPGYLV	0.702032	0.572562	0.175718	0.980261	0.980041	2.69787	4.95383
LAT_HUMAN_156_YA	ADEDEDDYHNPGALV	0.228986	0.453062	0.111169	0.451647	1.04892	2.24041	4.59791
LAT_HUMAN_161	DDYHNPGYLVVLPDS	0.169934	0.194392	0.350529	0.269757	0.192881	3.16951	4.01212
LAT_HUMAN_161_YA	DDAHNPGYLVVLPDS	0.110411	0.228241	0.341871	0.19592	0.120144	0.119103	0.137248
LAT_HUMAN_200	SMESIDDYVNVPESG	0.112638	0.21045	0.363096	0.229198	0.292462	0.14288	4.56182
LAT_HUMAN_220	SLDGSREYVNVSQEL	0.135831	0.222261	0.186228	0.190811	0.15478	0.124645	0.949267
LAT_HUMAN_255	EEEGAPDYENLQELN	0.203182	0.191726	0.299231	0.212953	0.249433	0.192533	4.53098
LAT2_HUMAN_118	IDPIAMEYYNWGRFS	2.71496	2.07554	2.60166	3.10526	3.25934	2.91529	5.03415
LAT2_HUMAN_118_YA	IDPIAMEYANWGRFS	3.23102	3.25552	2.78451	3.00769	3.61669	2.75836	0.74017
LAT2_HUMAN_119	DPIAMEYYNWGRFSK	3.102	3.17818	2.65183	2.55088	3.5282	3.3641	4.89834
LAT2_HUMAN_119_YA	DPIAMEAYNWGRFSK	0.454848	0.479741	0.583105	0.438271	0.224989	0.14029	0.206425
LAT2_HUMAN_95	EDPASSRYQNFSKGS	0.135372	0.308878	0.27055	0.251856	0.111145	0.117426	0.181484
LAX1_HUMAN_193	SSEDSHDYVNVPTAE	0.0898699	0.0570545	0.0423301	0.0494774	0.129382	0.0804132	4.56355
LAX1_HUMAN_268	SSQISNDYVNMTGLD	0.124916	0.195229	0.141426	0.520426	0.132045	0.151472	4.19129
LAX1_HUMAN_294	AFQCCRDYENVPAAD	1.49999	1.13873	1.10497	1.03492	0.244592	0.128046	4.91739
LAX1_HUMAN_345	TFLASGDYADFQPFT	3.31589	2.58858	2.48067	2.25206	3.79955	4.42083	4.54457
LAX1_HUMAN_373	SNEDSSDYENVLTAK	0.179813	0.292595	0.188577	0.358616	0.279465	0.155953	3.90943
LCAP_HUMAN_70	MEEDEEDYESSAKLL	0.190644	0.214187	0.16869	0.310961	0.204128	0.160996	4.40445
LCK_HUMAN_192	NLDNGGFYISPRITF	0.200493	0.353744	0.273115	0.235828	1.00132	2.7264	0.364101
LCK_HUMAN_505	FTATEGQYQPQPGGG	0.0921243	0.34311	0.234276	0.22944	0.162271	0.184422	0.19391
LCP2_HUMAN_113	SSFEEDDYESPNDDQ	0.136451	0.235954	0.201004	0.190446	0.136467	0.159341	4.66462
LCP2_HUMAN_128	DGEDDGDYESPNEEE	0.145759	0.201457	0.160964	0.185617	0.167761	0.179415	0.441333
LCP2_HUMAN_173	FPNSNSMYIDRPPSG	0.0779582	0.047031	0.0631017	0.0661139	0.0913294	0.0794392	0.156775
LCP2_HUMAN_23	DPDSLADYFKKLNYK	0.224306	0.15218	0.210925	0.136329	0.244015	0.163273	0.331909
LCP2_HUMAN_23_YA	DPDSLADYFKKLNAK	0.168662	0.184604	1.02743	0.249203	0.0962082	0.0969038	0.204512
LDHA_HUMAN_10	TLKDQLIYNLLKEEQ	1.96983	2.61414	4.34634	2.47974	2.13724	0.385225	0.100684
LDHA_HUMAN_239	KQVVESAYEVIKLKG	3.93056	3.41283	3.15673	3.08684	3.76669	2.99774	2.83893
LDHA_HUMAN_83	KIVSGKDYNVTANSK	0.278012	0.117103	0.231977	0.159772	0.133688	0.0772831	0.236792
LDHB_HUMAN_240	KMVVESAYEVIKLKG	3.72581	2.66344	3.0169	3.06792	3.73943	2.62453	2.88595
LEPR_HUMAN_1079	NDKKSIYYLGVTSIK	1.3898	1.52712	1.46878	1.56481	2.5076	1.46567	0.392642
LEPR_HUMAN_1079_YA	NDKKSIAYLGVTSIK	0.115254	0.268735	0.137357	0.197826	0.251606	0.206394	0.200108
LEPR_HUMAN_1141	SKKTFASYMPQFQTC	0.25147	0.193327	0.18665	0.270635	0.263961	0.201002	0.239609
LGALS3_HUMAN_107	AYPATGPYGAPAGPL	0.153143	0.290096	0.313724	0.154245	0.184558	0.745114	0.135855
LGALS3_HUMAN_107_YA	AAPATGPYGAPAGPL	0.150038	0.503371	0.332099	0.304282	0.149498	0.566017	0.100394
LGALS3_HUMAN_118	AGPLIVPYNLPLPGG	0.169174	0.150836	0.102795	0.112237	0.158294	0.151174	0.191794
LGALS3_HUMAN_79	GAPAPGVYPGPPSGP	0.121916	0.242885	0.212027	0.521694	0.166062	0.168603	0.145002
LHX3_HUMAN_227	GRQRWGQYFRNMKRS	0.146006	0.12365	0.199453	0.223249	0.140378	0.12583	0.158185
LIMC1_HUMAN_313	GGERPFRYGPRTPVS	0.146729	0.120072	0.148929	0.130137	0.213895	0.175483	0.161504
LIME1_HUMAN_167	ASPVVAEYARVQKRK	0.138754	0.215636	0.174259	0.186917	0.129096	0.136624	0.144949
LIME1_HUMAN_200	AAQVDVLYSRVCKPK	1.22706	2.34134	2.43304	1.99379	1.80362	2.43131	0.472094
LIME1_HUMAN_254	SGPLENVYESIRELG	3.98891	3.58559	3.26839	4.04736	3.87957	3.54162	4.39095
LIRB1_HUMAN_533	DAQEENLYAAVKHTQ	2.69028	2.12442	2.53364	2.37811	2.97771	2.55657	2.65815
LIRB1_HUMAN_614	EAPQDVTYAQLHSLT	3.49618	3.51298	2.82746	3.0172	3.81738	3.885	0.425365
LIRB1_HUMAN_644	SPAVPSIYATLAIHG	2.91378	2.86882	2.56774	3.05486	3.31939	2.86929	0.298308
LIRB3_HUMAN_595	EASQDVTYAQLHSLT	3.27736	4.08705	2.90731	2.82246	3.57731	3.44617	0.353156
LMP2_EBVA8_112	DDSSQHIYEEAGRGS	3.56666	3.46022	3.1661	3.55201	3.93131	3.41976	1.02199
LMTK1_HUMAN_279	YGLAHCKYREDYFVT	0.723012	0.69602	1.17905	1.45895	0.341735	1.42818	1.39192
LMTK1_HUMAN_279_YA	AGLAHCKYREDAFVT	0.231785	0.221374	0.290018	0.176692	0.242867	0.155274	0.286202
LMTK2_HUMAN_291	YGIGFSRYKEDYIET	0.178899	0.140794	0.274398	0.247974	0.17358	0.741998	0.231412
LMTK2_HUMAN_291_YA	AGIGFSRYKEDAIET	0.167858	0.185093	0.22648	0.318708	0.114321	0.125107	0.261204
LMTK2_HUMAN_295	FSRYKEDYIETDDKK	0.0970514	0.183341	0.191325	0.287575	0.217893	0.160758	0.209857
LMTK2_HUMAN_295_YA	FSRAKEDYIETDDKK	0.156653	0.25916	0.272126	0.123384	0.148087	0.109127	0.188018
LMTK3_HUMAN_292	YGLAHSNYKEDYYLT	2.99036	1.7518	2.19199	2.07377	1.31215	2.65017	4.37531
LMTK3_HUMAN_292_YA	AGLAHSNYKEDAALT	0.15888	0.226328	0.123054	0.102442	0.0912208	0.170904	0.151693
LMTK3_HUMAN_297	SNYKEDYYLTPERLW	3.21075	2.39522	2.97405	2.46778	3.91406	3.30781	5.10595
LMTK3_HUMAN_297_YA	SNAKEDAYLTPERLW	0.311068	0.308562	0.276346	0.494841	1.5767	2.89434	0.953717
LPP_HUMAN_244	APSSGQIYGSGPQGY	3.75578	3.02329	2.71332	2.68463	3.71202	3.68449	0.209115
LPP_HUMAN_244_YA	APSSGQIYGSGPQGA	3.15038	3.8516	2.82357	3.28587	3.57927	3.48459	0.185899
LPP_HUMAN_301	GRYYEGYYAAGPGYG	3.28712	2.77312	3.3516	2.68521	3.5952	3.50393	0.823221
LPP_HUMAN_301_YA	GRAAEGAYAAGPGAG	0.163225	0.371839	0.517375	0.413502	0.157166	0.798601	0.15644
LPXN_HUMAN_22	TLQDSDEYSNPAPLP	0.842711	0.787655	0.864228	0.540803	0.516754	1.55756	5.47414
LPXN_HUMAN_72	NIQELNVYSEAQEPK	3.39871	2.16185	2.73954	2.57035	2.16837	1.20685	0.252877
LRC25_HUMAN_284	DLASQPVYCNLQSLG	3.5657	3.18769	3.01806	2.96834	3.99781	3.98442	1.35913
LRC47_HUMAN_509	KMAEMKKYTLENKEE	0.197789	0.206396	0.302501	0.27671	0.153202	0.137815	0.231033
LRP1_HUMAN_4473	VEIGNPTYKMYEGGE	2.12192	1.59763	2.4653	2.94581	0.168344	0.159089	0.220324
LRP1_HUMAN_4473_YA	VEIGNPTYKMAEGGE	0.154577	0.238804	0.207259	0.264501	0.195114	0.125014	0.210984
LRP1_HUMAN_4507	TNFTNPVYATLYMGG	4.49003	3.40517	3.12615	2.95431	3.92694	3.57598	0.38029
LRP1_HUMAN_4507_YA	TNFTNPVYATLAMGG	3.78344	3.44369	2.68814	3.08754	4.00534	3.86463	0.193782
LRP1B_HUMAN_4562	TNYSNPVYAKLYMDG	3.24067	3.5192	3.08777	3.34017	3.49981	3.11539	0.317685
LRP1B_HUMAN_4562_YA	TNASNPVYAKLAMDG	3.53289	4.51107	3.01206	3.6123	3.63317	3.66888	0.130779
LRRK1_HUMAN_971	TQQTEEQYFQFLAKF	1.35155	1.34293	0.978543	1.48667	0.463706	1.40821	1.17704
LRRK2_HUMAN_1402	FAGREEFYSTHPHFM	2.70789	2.03457	2.47012	2.29741	3.73753	3.54261	0.221781
LRRK2_HUMAN_1485	GFPAIRDYHFVNATE	0.140137	0.182612	0.147041	0.256104	0.146301	0.136911	1.75046
LSAMP_HUMAN_94	EKRHSLEYSLRIQKV	0.206868	0.242405	0.225597	0.200704	0.234621	0.166482	0.17271
LSR_HUMAN_535	SRSRDDLYDQDDSRD	0.108391	0.176165	0.229757	0.229274	0.105824	0.107427	0.162793
LTK_HUMAN_672	FGMARDIYRASYYRR	0.118627	0.229689	0.188792	0.271904	0.182541	0.191074	0.247318
LTK_HUMAN_672_YA	FGMARDIYRASAARR	0.126726	0.334598	0.202258	0.260445	0.142158	0.131813	0.176627
LTK_HUMAN_677	DIYRASYYRRGDRAL	0.173731	0.326256	0.338103	0.284977	0.655885	1.73835	0.179396
LTK_HUMAN_677_YA	DIARASAYRRGDRAL	0.157604	0.591617	0.217101	0.186484	0.135849	0.138688	0.182265
LY66F_HUMAN_281	FKPEIQVYENIHLAR	3.23999	3.07045	2.62289	2.72542	4.66035	3.07618	2.09251
LY9_HUMAN_603	VVGENTMYAQVFNLQ	2.86703	2.99111	3.07788	2.50982	2.96879	3.14905	0.291851
LY96_HUMAN_131	IKFSKGKYKCVVEAI	0.248638	0.181573	0.184297	0.283544	0.298404	0.194522	0.535948
LY96_HUMAN_22	FTEAQKQYWVCNSSD	0.205877	0.456847	0.293124	0.366568	0.21541	0.189552	0.911843
LYN_HUMAN_316	VTREEPIYIITEYMA	3.54398	2.41074	2.96608	3.05082	4.70352	3.26621	3.14991
LYN_HUMAN_316_YA	VTREEPIYIITEAMA	2.68726	2.50594	6.50875	2.72861	3.31967	2.78026	3.47965
LYN_HUMAN_460	MTALSQGYRMPRVEN	0.109048	0.144543	0.219229	0.180408	0.103653	0.118463	0.188679
LYN_HUMAN_473	ENCPDELYDIMKMCW	3.04654	2.511	2.71963	2.57642	3.1863	1.86393	3.63611
LYN_HUMAN_508	YTATEGQYQQQPGGG	0.174813	0.198801	0.162132	0.15747	0.14369	0.349934	0.194242
LYN_HUMAN_508_YA	ATATEGQYQQQPGGG	0.120368	0.258536	0.217069	0.254635	0.14137	0.131681	0.195225
M2OM_HUMAN_102	TTTRLGIYTVLFERL	1.92203	2.10729	2.09348	1.70225	2.47764	0.935777	0.515605
M3K5_HUMAN_718	IPERDSRYSQPLHEE	0.131964	0.276456	0.239613	0.205492	0.123792	0.0787052	1.57202
MAGD1_HUMAN_92	TKGPNGVYDFSQAHN	1.48788	1.83084	1.13026	1.67997	1.22714	1.02973	0.131917
MAGH1_HUMAN_195	SKDWPCNYDWDSDDD	0.217851	0.216171	0.281342	0.284335	0.133398	0.143418	0.259178
MAGI2_HUMAN_362	EKIDDPIYGTYYVDH	2.87852	2.95581	2.82985	3.44054	2.88022	2.2902	3.6317
MAGI2_HUMAN_362_YA	EKIDDPIYGTAAVDH	3.48932	2.44829	2.34746	2.49637	4.03087	3.84092	1.84587
MAK_HUMAN_159	SQPPYTDYVSTRWYR	2.4274	2.90086	2.65459	2.21259	1.82136	2.9997	1.12871
MAK_HUMAN_159_YA	SQPPATDYVSTRWAR	0.193607	0.561627	0.16448	0.180965	0.190408	0.945999	0.187926
MANF_HUMAN_76	GKENRLCYYIGATDD	0.246483	0.251327	0.393258	0.247536	0.327213	0.251326	0.350759
MANF_HUMAN_76_YA	GKENRLCYAIGATDD	0.209731	0.160281	0.192901	0.170678	0.227291	0.149892	0.318932
MAP1A_HUMAN_177	GIQAEPLYRVVSNTI	2.18287	2.31342	1.93571	2.1589	2.57658	3.492	0.204516
MAP2_HUMAN_67	EHGSQGTYSNTKENG	0.145749	0.240015	0.320232	0.354187	0.124087	0.110181	0.164176
MAP2K6_HUMAN_219	IDAGCKPYMAPERIN	0.205968	0.264065	0.193512	0.192078	0.194191	0.551069	0.250867
MAP6_HUMAN_143	SCRPRSEYQPSDAPF	0.173943	0.226271	0.308407	0.327988	0.156979	1.51108	0.227316
MAP9_HUMAN_12	VFSTTLAYTKSPKVT	0.138069	0.169456	0.303905	0.351427	0.159618	0.108009	0.189846
MAPK3_HUMAN_210	EYVATRWYRAPEIML	0.381016	0.804248	0.861331	0.585517	0.752885	3.12887	0.347425
MAPK3_HUMAN_210_YA	EAVATRWYRAPEIML	0.142828	0.192844	0.217806	0.219972	0.227359	0.443078	0.160588
MARE1_HUMAN_124	ANYDGKDYDPVAARQ	0.159082	0.249771	0.306842	0.28456	0.170854	0.159681	1.07972
MARE1_HUMAN_124_YA	ANADGKDYDPVAARQ	0.15899	0.200873	0.178986	0.162628	0.170601	0.188774	0.550245
MARE2_HUMAN_167	ANYDGKEYDPVEARQ	0.169046	0.230275	0.523878	0.345901	0.134919	0.142299	0.507988
MARE2_HUMAN_167_YA	ANADGKEYDPVEARQ	0.153353	0.235806	0.261141	0.15065	0.151621	0.133574	0.252423
MARE3_HUMAN_124	ANYDGKDYNPLLARQ	0.132724	0.159705	0.145306	0.187108	0.156918	0.101452	0.168522
MARE3_HUMAN_124_YA	ANADGKDYNPLLARQ	0.134562	0.207952	0.182743	0.17923	0.161871	0.167231	0.140894
MARF1_HUMAN_699	SGVAEPVYKTSQKKE	0.174178	0.547589	0.401477	0.334742	0.434655	1.74578	0.168539
MATR3_HUMAN_158	EEGPTLSYGRDGRSA	0.218272	0.415301	0.299483	0.217231	0.107818	0.126567	0.112709
MATR3_HUMAN_202	SLNPVLDYDHGSRSQ	0.176284	0.18693	0.210259	0.316722	0.108933	0.139122	0.230283
MATR3_HUMAN_219	GYYDRMDYEDDRLRD	0.527284	0.496771	0.598874	0.68863	1.59831	0.109896	1.38016
MATR3_HUMAN_219_YA	GAADRMDYEDDRLRD	0.150215	0.199182	0.633466	0.183795	0.116748	0.13008	0.202366
MBP_HUMAN_148	SQRHGSKYLATASTM	0.244096	0.308563	0.228701	0.237325	0.390588	0.297952	0.205462
MCM3_HUMAN_708	DGDSYDPYDFSDTEE	2.79758	3.78428	2.54546	1.69993	1.6974	0.164294	2.58401
MCM3_HUMAN_708_YA	DGDSADPYDFSDTEE	1.15049	0.824162	0.176618	0.942098	0.127447	0.153292	0.263468
MCM7_HUMAN_600	WASKDATYTSARTLL	2.66655	3.02865	2.54712	2.79575	3.26511	3.22855	0.159197
MDM2_HUMAN_276	SDEDDEVYQVTVYQA	2.91107	1.57766	2.22908	1.23091	3.36867	2.54035	4.18886
MDM2_HUMAN_276_YA	SDEDDEVYQVTVAQA	3.00685	2.5565	2.90941	1.71789	3.6246	2.66647	4.40614
MDM2_HUMAN_281	EVYQVTVYQAGESDT	3.74969	2.69332	3.06664	2.62648	4.56946	4.07496	0.596372
MDM2_HUMAN_281_YA	EVAQVTVYQAGESDT	0.145345	0.232074	0.20619	0.291321	0.119974	0.112541	0.179209
MDM2_HUMAN_405	STSSSIIYSSQEDVK	3.03012	1.59005	1.85419	1.77296	3.22467	3.23499	0.128716
MDM4_HUMAN_55	TVKEVMHYLGQYIMV	1.01286	0.809739	1.21636	1.38662	0.431267	0.454086	1.31127
MDM4_HUMAN_55_YA	TVKEVMHYLGQAIMV	0.22839	0.233062	0.220552	0.200925	0.216906	0.182894	0.346066
MDM4_HUMAN_99	VKDPSPLYDMLRKNL	3.02601	3.36702	3.19687	3.17319	3.61967	2.44648	0.19436
MED28_HUMAN_64	ASLVSQDYVNGTDQE	0.150935	0.18733	0.195918	0.203564	0.150773	0.106142	0.216667
MELK_HUMAN_163	KPKGNKDYHLQTCCG	0.457105	0.320508	0.518043	0.277072	0.986901	0.41956	0.396112
MELK_HUMAN_367	VTASDKNYVAGLIDY	0.151628	0.261995	0.164948	0.215639	0.123912	0.12376	0.167041
MELK_HUMAN_367_YA	VTASDKNYVAGLIDA	0.105719	0.111527	0.101229	0.171749	0.133504	0.11387	0.161174
MELK_HUMAN_438	SAVKNEEYFMFPEPK	2.20319	2.24285	3.01319	2.2924	0.576816	2.68065	4.91151
MEMO1_HUMAN_210	DESQGEIYRSIEHLD	3.46039	2.82999	3.17785	3.15431	3.57176	3.84931	1.04711
MERTK_HUMAN_749	FGLSKKIYSGDYYRQ	0.362958	0.356795	0.547101	0.489414	0.303332	0.592538	0.779495
MERTK_HUMAN_749_YA	FGLSKKIYSGDAARQ	0.266019	0.413596	0.256119	0.329546	0.26438	0.10438	0.201307
MERTK_HUMAN_753	KKIYSGDYYRQGRIA	0.418184	0.601682	0.721503	0.291912	0.625944	1.65756	0.316115
MERTK_HUMAN_753_YA	KKIASGDYARQGRIA	0.146437	0.268222	0.195722	0.338409	0.179018	0.107284	0.186147
MERTK_HUMAN_754	KIYSGDYYRQGRIAK	1.4542	0.847243	1.20783	1.03328	1.38028	1.63648	0.329403
MERTK_HUMAN_754_YA	KIASGDAYRQGRIAK	0.1691	0.276414	0.288126	0.221579	0.260254	0.180421	0.200135
MET_HUMAN_1003	VSNESVDYRATFPED	0.156619	0.166109	0.218203	0.244135	0.154051	0.259967	0.242884
MET_HUMAN_1230	FGLARDMYDKEYYSV	3.48896	10.1961	3.72689	3.53329	2.94072	3.34437	5.77237
MET_HUMAN_1230_YA	FGLARDMYDKEAASV	0.138586	0.259996	0.195234	0.239385	0.251255	0.177648	0.158259
MET_HUMAN_1235	DMYDKEYYSVHNKTG	2.34428	2.97828	2.89273	2.74438	2.62369	3.14832	4.41105
MET_HUMAN_1235_YA	DMADKEAYSVHNKTG	0.137363	0.165775	0.268826	0.208949	0.124199	0.114976	0.175982
MET_HUMAN_1349	STFIGEHYVHVNATY	0.390823	0.381335	0.84332	0.501247	0.281465	0.364175	0.681484
MET_HUMAN_1349_YA	STFIGEHYVHVNATA	0.174489	0.253139	0.217866	0.199261	0.0929843	0.156677	0.280512
MET_HUMAN_1356	YVHVNATYVNVKCVA	0.326613	0.355464	0.573774	0.351871	1.72107	0.596583	0.357046
MET_HUMAN_1356_YA	AVHVNATYVNVKCVA	0.239293	0.388716	0.440793	0.239508	1.35292	0.234045	0.558626
MET_HUMAN_1365	NVKCVAPYPSLLSSE	0.185923	0.226656	0.331816	0.276831	0.192644	0.147642	0.221731
MFA3L_HUMAN_287	AADRDEVYTIPNSLK	3.00942	2.29433	2.34186	2.1879	3.56284	3.31697	5.00305
MGRN1_HUMAN_411	AIPSAPLYEEITYSG	3.11779	3.22759	2.67436	2.29351	3.26142	3.04917	4.83313
MGRN1_HUMAN_411_YA	AIPSAPLYEEITASG	3.39874	2.54092	2.56436	2.64467	4.14651	2.46626	2.8982
MIC19_HUMAN_49	SGSKSQRYSGAYGAS	0.157122	0.191722	0.250314	0.176788	0.142905	0.135255	0.197303
MIC19_HUMAN_49_YA	SGSKSQRYSGAAGAS	0.135918	0.250674	0.198224	0.132245	0.16452	0.145909	0.23901
MIER1_HUMAN_155	IRPRRCKYFDTNSEV	0.0973187	0.111835	0.271353	0.143802	0.0870091	0.0923938	0.124165
MILR1_HUMAN_313	KHSQELQYATPVFQE	0.346906	0.215364	0.660801	0.346494	0.423181	2.86388	0.363921
MILR1_HUMAN_338	SYKSGYVYSELNFGG	3.34571	2.53683	2.89923	2.80598	3.88547	3.14819	0.342863
MILR1_HUMAN_338_YA	SAKSGAVYSELNFGG	3.74072	3.07852	2.73743	2.71715	4.853	4.13833	0.508402
MIXL1_HUMAN_20	EGAAFPAYRAPHAGG	0.140334	0.450583	0.183495	0.249042	0.140035	2.27113	0.210757
MK08_HUMAN_185	TSFMMTPYVVTRYYR	0.168881	0.321224	0.346175	0.306959	0.165932	0.146565	0.337096
MK08_HUMAN_185_YA	TSFMMTPYVVTRAAR	0.118753	0.169225	0.118719	0.117839	0.630931	0.217213	0.17311
MK09_HUMAN_185	TNFMMTPYVVTRYYR	0.157084	0.196279	0.190737	0.175555	0.146416	0.101841	0.219453
MK09_HUMAN_185_YA	TNFMMTPYVVTRAAR	0.134755	0.283483	0.27581	0.238442	0.112528	0.156617	0.175152
MK11_HUMAN_182	ADEEMTGYVATRWYR	0.189145	0.541483	0.222737	0.408046	0.234362	2.03973	0.256509
MK11_HUMAN_182_YA	ADEEMTGYVATRWAR	0.188689	0.343326	0.159858	0.167025	0.131006	0.649173	0.22291
MK11_HUMAN_323	DEPEAEPYDESVEAK	0.143555	0.264345	0.273053	0.255319	0.164378	0.164766	0.2657
MK12_HUMAN_185	ADSEMTGYVVTRWYR	0.181999	0.192446	0.205555	0.236577	0.255862	0.806942	0.36749
MK12_HUMAN_185_YA	ADSEMTGYVVTRWAR	0.201204	0.301517	0.178783	0.256104	0.162736	0.224993	0.282366
MK13_HUMAN_182	ADAEMTGYVVTRWYR	0.180987	0.234711	0.221504	0.195702	0.197354	0.573388	0.496629
MK13_HUMAN_182_YA	ADAEMTGYVVTRWAR	0.188522	0.336633	0.21769	0.253271	0.163639	0.189725	0.385862
MK14_HUMAN_182	TDDEMTGYVATRWYR	0.272876	0.290925	0.178214	0.358483	0.382109	2.14801	0.206863
MK14_HUMAN_182_YA	TDDEMTGYVATRWAR	0.276036	0.422313	1.38728	0.578866	0.207067	1.20412	0.233873
MK14_HUMAN_323	DEPVADPYDQSFESR	0.419604	0.462822	0.82411	0.425566	0.165211	0.139852	0.230168
MK15_HUMAN_177	EDQAVTEYVATRWYR	0.373259	0.881554	0.690751	0.663787	1.02452	2.19257	0.628312
MK15_HUMAN_177_YA	EDQAVTEYVATRWAR	0.218082	0.742268	0.556002	0.384029	0.581817	2.14482	0.366701
MMP1_HUMAN_360	GQNVLHGYPKDIYSS	3.10963	2.57124	2.92165	2.77675	2.76858	1.31174	0.163149
MMP1_HUMAN_360_YA	GQNVLHGYPKDIASS	0.166862	0.232214	0.241259	0.126281	0.1256	0.199195	0.292372
MMP13_HUMAN_366	GYDILEGYPKKISEL	0.231515	0.159424	0.334698	0.212121	0.125345	0.119368	0.142974
MMP13_HUMAN_366_YA	GADILEGYPKKISEL	0.0976824	0.143578	0.166247	0.231022	0.157442	0.157751	0.161337
MMP14_HUMAN_399	EASLEPGYPKHIKEL	0.135904	0.253819	0.239731	0.227872	0.087179	0.163104	0.176829
MMP14_HUMAN_573	GTPRRLLYCQRSLLD	0.145222	0.143151	0.219569	0.176133	0.206737	0.162815	0.316665
MNS1_HUMAN_188	NKAKAQYYLDLEKQL	0.180058	0.482671	0.217642	0.289605	0.148008	0.174123	0.20996
MNS1_HUMAN_188_YA	NKAKAQAYLDLEKQL	0.147848	0.18722	0.146871	0.222614	0.151286	0.142019	0.262511
MOES_HUMAN_116	GILNDDIYCPPETAV	3.14377	2.02262	2.27154	1.96865	3.71457	3.3046	4.89018
MPP6_HUMAN_500	SARIQRAYNHYFDLI	0.202726	0.59248	0.274686	0.195557	0.255744	0.380296	0.340971
MPP6_HUMAN_500_YA	SARIQRAYNHAFDLI	0.151953	0.327177	0.243497	0.217674	0.148528	0.0966739	0.178431
MPZL1_HUMAN_241	SHQGPVIYAQLDHSG	3.5932	3.02325	2.93679	3.04226	3.34789	3.3789	0.192855
MPZL1_HUMAN_263	NKSESVVYADIRKNG	3.49736	3.35944	2.97923	3.53957	5.50541	3.65547	0.22642
MRCKB_HUMAN_954	FQDSIFEYFNTAPLA	0.192377	0.463049	0.565824	0.184215	0.163846	0.963577	5.44376
MRP1_HUMAN_277	KQPVKVVYSSKDPAQ	0.473067	0.217881	0.386718	0.210892	0.509708	0.257642	0.179288
MSH2_HUMAN_238	DFSTKDIYQDLNRLL	3.62632	2.75744	2.85995	2.86202	3.83865	3.7569	3.90635
MTAP2_HUMAN_745	SMDEGDDYLPATTPA	0.133385	0.273711	0.27223	0.20804	0.123954	0.136928	4.06089
MUC1_HUMAN_1203	IFPARDTYHPMSEYP	0.173562	0.190216	0.263756	0.210255	0.160905	0.119778	0.439724
MUC1_HUMAN_1203_YA	IFPARDTYHPMSEAP	0.149373	0.167852	0.295828	0.231819	0.154811	0.127503	0.22983
MUC1_HUMAN_1218	TYHTHGRYVPPSSTD	0.200302	0.486714	0.307226	0.236134	0.187631	0.22107	0.186698
MUC1_HUMAN_1218_YA	TAHTHGRYVPPSSTD	0.158592	0.207285	0.182813	0.212389	0.200143	0.155304	0.172821
MUC1_HUMAN_1229	SSTDRSPYEKVSAGN	0.113259	0.180847	0.213004	0.179512	0.141176	0.112151	0.15376
MUC1_HUMAN_1243	NGGSSLSYTNPAVAA	0.115937	0.279953	0.209416	0.229435	0.130177	0.124494	0.148568
MUSK_HUMAN_751	FGLSRNIYSADYYKA	3.14206	3.55009	4.18589	3.59636	3.11295	2.80974	1.15582
MUSK_HUMAN_751_YA	FGLSRNIYSADAAKA	0.630748	1.13766	1.36793	1.01559	0.494202	0.226733	0.177365
MUSK_HUMAN_756	NIYSADYYKANENDA	3.53602	3.30248	3.19256	7.08761	3.43737	3.33728	1.42671
MUSK_HUMAN_756_YA	NIASADAYKANENDA	0.135987	0.120691	0.150384	0.159932	0.137514	0.0886192	0.187793
MY18A_HUMAN_2035	DNTSRPRYSHSYLSD	0.15998	0.181516	0.195933	0.198852	0.132814	0.136467	0.178756
MY18A_HUMAN_2035_YA	DNTSRPRYSHSALSD	0.14192	0.382583	0.210013	0.21342	0.135742	0.135863	0.157733
MYC_HUMAN_32	CDEEENFYQQQQQSE	0.325217	0.213496	0.166352	0.24094	0.306799	0.166991	1.38868
MYC_HUMAN_74	SGLCSPSYVAVTPFS	0.172901	0.221619	0.182499	0.141586	0.219485	1.08572	0.348719
MYH1_HUMAN_389	EVADKAAYLQNLNSA	0.167463	0.257499	0.195311	0.297173	0.139428	0.141649	0.142654
MYH1_HUMAN_424	GQTVQQVYNAVGALA	2.58342	3.2949	2.89253	2.60755	3.19837	2.36398	0.157638
MYH2_HUMAN_389	EVADKAAYLQSLNSA	0.106505	0.0754294	0.169923	0.176601	0.103276	0.110541	0.240307
MYH4_HUMAN_389	EVADKAAYLTSLNSA	0.115727	0.257999	0.237182	0.279965	0.109068	0.115016	0.191452
MYH9_HUMAN_158	YAITDTAYRSMMQDR	0.169448	0.216962	0.240273	0.266622	0.106742	2.59319	0.153905
MYH9_HUMAN_158_YA	AAITDTAYRSMMQDR	0.129586	0.19806	0.287694	0.211917	0.161853	0.169252	0.162771
MYL3_HUMAN_130	KNKDTGTYEDFVEGL	2.56606	2.04059	2.30765	2.27492	0.187443	0.389323	0.480986
MYLK_HUMAN_1449	EKEPEVDYRTVTINT	0.13634	0.218808	0.301386	0.187883	0.117764	0.875576	0.168641
MYLK_HUMAN_1635	VAPEVINYEPIGYAT	2.2214	1.58022	1.48345	1.89643	3.28721	2.77222	3.57348
MYLK_HUMAN_1635_YA	VAPEVINYEPIGAAT	0.97501	0.705677	0.428085	0.922091	2.32837	1.51448	4.27964
MYLK_HUMAN_231	NQDDVGVYTCLVVNG	0.601941	0.782669	1.2126	1.71021	0.657723	0.475901	0.402974
MYLK_HUMAN_471	YEDAGSHYLCLLKAR	0.365081	0.73747	0.589055	0.521873	0.908062	2.87596	0.71621
MYLK_HUMAN_471_YA	AEDAGSHYLCLLKAR	0.242893	0.446972	0.34321	0.444558	0.476541	2.78345	0.225709
MYLK_HUMAN_611	KSSRKSEYLLPVAPS	0.136979	0.222921	0.380631	0.204768	0.158013	1.62703	0.182135
MYLK_HUMAN_846	DGGGSDRYGSLRPGW	0.263817	1.07799	0.480313	0.376559	0.575007	0.137715	0.156063
MYPC1_HUMAN_823	AGASEPKYYSQPILV	0.158078	0.204063	0.211065	0.230879	0.149707	3.02249	0.2199
MYPC1_HUMAN_823_YA	AGASEPKYASQPILV	0.133245	0.190274	0.276956	0.232338	0.143636	1.67833	0.153759
MYPT1_HUMAN_446	GLRKTGSYGALAEIT	0.237132	0.190524	0.231471	0.345688	0.249684	0.186701	0.237316
NAA50_HUMAN_110	DGTFDNIYLHVQISN	0.283841	0.169287	0.26178	0.254746	0.305864	0.228586	0.511778
NAMPT_HUMAN_188	GNLDGLEYKLHDFGY	0.591566	0.943213	0.958956	1.04218	0.178228	0.13889	0.403818
NAMPT_HUMAN_188_YA	GNLDGLEYKLHDFGA	0.227585	0.344983	0.440693	0.500955	0.108044	0.121384	0.236722
NANOG_HUMAN_35	ICGPEENYPSLQMSS	0.150092	0.279324	0.260986	0.240098	0.162547	0.181205	0.184466
NCK1_HUMAN_105	VDPGERLYDLNMPAY	3.21551	2.95048	3.33842	2.82032	3.35773	3.42867	0.574032
NCK1_HUMAN_105_YA	VDPGERLYDLNMPAA	2.57252	2.76849	2.35519	2.43222	3.31594	3.08024	0.254544
NCK2_HUMAN_110	GSGADRIYDLNIPAF	3.46189	2.70428	2.7799	2.85879	3.83434	3.81149	0.352722
NCKIPSD_HUMAN_227	STSLDTLYTSSSPSE	0.850505	0.985561	1.29581	1.17523	0.361709	0.189345	0.143677
NDUV2_HUMAN_193	VQINDNYYEDLTAKD	2.11466	0.999052	0.64079	1.06288	1.19985	0.16608	3.75484
NDUV2_HUMAN_193_YA	VQINDNAYEDLTAKD	0.31275	0.430673	0.315619	0.518165	0.114449	0.122935	3.18753
NECT1_HUMAN_436	GPLGGSSYEEEEEEE	0.177575	0.253643	0.20315	0.209005	0.137513	0.134545	0.703282
NEGR1_HUMAN_187	KPFENGQYLDIYGIT	2.81414	2.97113	2.66756	3.10229	3.29731	2.33057	2.05096
NEGR1_HUMAN_187_YA	KPFENGQYLDIAGIT	0.162553	0.114899	0.161171	0.15293	0.18804	2.88177	4.02652
NEK9_HUMAN_52	AEQEELHYIPIRVLG	0.280612	0.323935	0.462221	0.390319	0.425913	0.923262	0.526711
NETO1_HUMAN_417	VADDFENYHKLRRSS	0.134403	0.24259	0.196832	0.200081	0.214138	0.325761	0.349548
NFASC_HUMAN_481	DGGNYHVYENGSLEI	2.63498	2.01899	2.44272	2.2882	1.61699	2.76711	2.81913
NFASC_HUMAN_481_YA	DGGNAHVYENGSLEI	0.742783	0.987318	1.43004	1.1426	0.169228	0.125273	0.150394
NFATC1_HUMAN_371	ADFAPEDYSSFQHIR	4.28223	2.79347	2.71873	2.50486	2.40341	3.69463	4.98357
NFIC_HUMAN_300	TSPGGDYYTSPSSPT	0.19516	0.316599	0.398561	0.406019	0.359173	2.01163	3.30943
NFIC_HUMAN_300_YA	TSPGGDAYTSPSSPT	0.178263	0.649028	0.154809	0.512209	0.105836	0.109103	0.0561643
NFIP2_HUMAN_151	TDSSPPPYSSITVEV	0.194296	0.268727	0.286008	0.354358	0.214101	0.194454	0.21375
NFIP2_HUMAN_167	TTSDTEVYGEFYPVP	3.16482	2.7864	2.18841	3.26946	3.88579	2.94434	2.16118
NFIP2_HUMAN_167_YA	TTSDTEVYGEFAPVP	2.78005	6.10262	3.12728	2.33861	2.31336	2.5027	0.346562
NFIP2_HUMAN_171	TEVYGEFYPVPPPYS	3.65794	2.77465	2.10537	2.35635	4.38197	3.90271	1.02882
NFIP2_HUMAN_171_YA	TEVAGEFYPVPPPAS	0.154121	0.344181	0.316656	0.291028	0.227794	0.11187	0.228708
NFIP2_HUMAN_177	FYPVPPPYSVATSLP	0.138862	0.147088	0.211968	0.148729	0.136826	0.149955	0.153167
NFIP2_HUMAN_177_YA	FAPVPPPYSVATSLP	0.188912	0.468513	0.304031	0.260998	0.186977	0.156458	0.221732
NFKBIA_HUMAN_305	FTEDELPYDDCVFGG	3.05551	2.35479	1.63049	2.14252	1.05423	0.147032	4.8254
NFL_HUMAN_43	ARSAYSSYSAPVSSS	1.3786	3.34866	2.08721	1.53893	0.595706	3.11318	0.185945
NFL_HUMAN_43_YA	ARSAASSYSAPVSSS	0.166392	0.315048	0.234403	0.18562	0.123763	1.39513	0.16881
NFM_HUMAN_320	AKEEIAEYRRQLQSK	0.161999	0.168131	0.200518	0.266176	0.285591	0.207919	0.249486
NGEF_HUMAN_179	IEQIGLLYQEYRDKS	3.26011	2.44407	2.56759	3.08978	3.84793	1.89381	0.283633
NGEF_HUMAN_179_YA	IEQIGLLYQEARDKS	0.308986	0.324514	0.718063	0.473551	0.544249	0.261717	0.190661
NIPBL_HUMAN_1159	SDSDMEDYSPPPSLS	0.218481	0.303877	0.205547	0.252346	0.165287	1.23536	5.02428
NMDE2_HUMAN_1109	FDEIELAYRRRPPRS	0.129945	0.312247	0.279295	0.145214	0.0408397	0.117342	0.199627
NMDE2_HUMAN_1133	KEGLRDFYLDQFRTK	0.205306	0.215658	0.257199	0.200588	0.250347	0.148985	0.21845
NMDE2_HUMAN_1474	GSSNGHVYEKLSSIE	1.59742	1.64275	1.70791	1.96092	2.83686	0.756781	0.183477
NMDE2_HUMAN_962	EENLFSDYISEVERT	0.295298	0.273732	0.321957	0.241355	0.186963	0.128854	2.24845
NMT1_HUMAN_180	YTLLNENYVEDDDNM	0.211748	0.233377	0.294585	0.314585	0.21752	0.270255	0.912177
NMT1_HUMAN_180_YA	ATLLNENYVEDDDNM	0.156917	0.311997	0.204987	0.214526	0.142605	0.09898	0.246908
NNRD_HUMAN_85	VVGGCQEYTGAPYFA	0.213174	0.20774	0.295779	0.247004	0.196572	0.218696	0.379035
NNRD_HUMAN_85_YA	VVGGCQEYTGAPAFA	0.134349	0.285008	0.27933	0.31512	0.336423	0.143895	0.367455
NOA1_HUMAN_77	ERFLFPEYILDPEPQ	3.05529	2.59743	2.77996	2.60477	0.331676	0.170208	0.900092
NOL8_HUMAN_376	IMRNDREYDSGDTDE	0.161827	0.186219	0.186163	0.137778	0.173128	0.17313	0.179845
NOS2_HUMAN_151	IEFVNQYYGSFKEAK	3.77684	2.41605	3.14229	2.88218	3.94281	2.45083	0.263955
NOS2_HUMAN_151_YA	IEFVNQAYGSFKEAK	2.76311	2.58442	2.63136	2.27303	3.09702	0.115052	0.159787
NOS2_HUMAN_575	KVVCMDKYRLSCLEE	0.178296	0.192336	0.190875	0.181151	0.172536	0.16036	0.265491
NOS3_HUMAN_657	FGLGSRAYPHFCAFA	0.226828	0.224189	0.197188	0.145966	0.178415	0.326915	0.386072
NPHN_HUMAN_1193	SGAWGPLYDEVQMGP	3.86891	3.37622	2.66543	2.36983	3.79212	2.92269	1.0693
NPHP1_HUMAN_349	GNQFRANYFLQPELM	0.287672	0.381781	0.362334	0.389355	0.139539	0.157139	0.287041
NPHP1_HUMAN_721	FDLSEQTYDFLGEMR	3.25653	2.99737	3.17835	3.89701	3.6694	3.29103	4.38035
NRCAM_HUMAN_1225	DDGTFGEYSDAEDHK	0.15414	0.190171	0.240276	0.296448	0.177063	0.122632	1.24756
NSF1C_HUMAN_167	APEEESAYVAGEKRQ	0.573313	1.376	0.502751	1.70422	0.0847188	0.11191	0.201356
NTAL_HUMAN_136	EDDDANSYENVLICK	0.325682	0.209138	0.205267	0.307989	0.542847	0.207614	5.24438
NTAL_HUMAN_193	EDEESEDYQNSASIH	0.141726	0.213296	0.262861	0.206807	0.164648	0.112931	4.27818
NTAL_HUMAN_233	EEDGEPDYVNGEVAA	0.165578	0.201215	0.232092	0.185167	0.183216	0.196913	3.84561
NTAL_HUMAN_58	SFTGSRTYSLVGQAW	1.55496	2.22385	2.02343	1.68445	1.37058	0.592352	0.21616
NTRK1_HUMAN_676	FGMSRDIYSTDYYRV	3.29673	2.51734	3.12443	2.76108	3.78983	3.55761	4.98546
NTRK1_HUMAN_676_YA	FGMSRDIYSTDAARV	2.4119	2.75799	2.73931	2.64838	2.37774	0.429701	0.179249
NTRK1_HUMAN_681	DIYSTDYYRVGGRTM	3.54222	3.02807	3.02025	3.1078	4.29374	3.63784	5.22023
NTRK1_HUMAN_681_YA	DIASTDAYRVGGRTM	0.115081	0.232314	0.206466	0.138828	0.132711	0.132666	0.137479
NTRK2_HUMAN_702	FGMSRDVYSTDYYRV	3.45711	4.37551	3.45924	2.84057	3.73089	3.56625	4.69116
NTRK2_HUMAN_702_YA	FGMSRDVYSTDAARV	1.45102	1.95854	2.12879	1.98698	0.670652	0.194209	0.18256
NTRK2_HUMAN_707	DVYSTDYYRVGGHTM	3.44688	3.02386	2.50741	2.43737	3.91752	3.69125	4.85324
NTRK2_HUMAN_707_YA	DVASTDAYRVGGHTM	0.145647	0.222476	0.222556	0.413508	0.123654	0.140808	0.171305
NTRK3_HUMAN_705	FGMSRDVYSTDYYRL	3.38267	2.86149	3.26537	2.75489	3.59934	3.57786	5.0853
NTRK3_HUMAN_705_YA	FGMSRDVYSTDAARL	1.71423	2.12965	2.18606	2.07045	0.874791	0.134346	0.208013
NTRK3_HUMAN_710	DVYSTDYYRLFNPSG	3.32718	2.943	2.85072	2.98097	3.64869	3.64664	4.64915
NTRK3_HUMAN_710_YA	DVASTDAYRLFNPSG	0.234753	0.376433	0.453179	0.43721	0.144897	0.224279	0.177202
NUCKS_HUMAN_26	SDDADEDYGRDSGPP	0.125119	0.349239	0.246958	0.237811	0.12756	0.0940633	0.250667
NUDC2_HUMAN_145	GAEISGNYTKGGPDF	0.162786	0.280844	0.263169	0.348901	0.12619	0.131656	0.156971
NUDT5_HUMAN_74	VLQRTLHYECIVLVK	0.35709	0.351801	0.353166	0.413562	0.987833	0.407868	0.688382
NUFP2_HUMAN_218	GSGSESGYTTPKKRK	0.124365	0.191793	0.36293	0.119576	0.120019	0.425139	0.179085
NUMA1_HUMAN_1774	VESLESLYFTPIPAR	2.47459	1.83045	2.47246	1.82614	3.54088	2.76012	4.50397
NUMA1_HUMAN_1836	DSANSSFYSTRSAPA	0.328726	1.06415	0.85016	0.604739	3.10699	0.170318	0.190591
NYAP2_HUMAN_268	DDQSEAVYEEMKYPI	3.36318	2.77291	2.58406	5.77395	3.46255	2.767	4.70972
NYAP2_HUMAN_268_YA	DDQSEAVYEEMKAPI	3.46423	2.81869	3.08254	2.65493	3.49939	3.17994	4.31544
OCLN_HUMAN_368	DDFRQPRYSSGGNFE	0.150875	0.348482	0.251998	0.197865	0.126553	0.146929	0.197621
OCLN_HUMAN_398	KRTEQDHYETDYTTG	1.32574	1.46293	0.775752	2.26207	0.145469	0.155955	0.847197
OCLN_HUMAN_398_YA	KRTEQDHYETDATTG	0.171604	0.266541	0.259605	0.286605	0.174142	0.155241	0.209914
ODPA_HUMAN_301	MSDPGVSYRTREEIQ	0.154523	0.277919	0.273541	0.260507	0.141132	1.45887	0.176089
ODPB_HUMAN_67	VAQYDGAYKVSRGLW	0.175567	0.337836	0.220461	0.246748	0.160407	1.83248	0.164547
ODPB_HUMAN_67_YA	VAQADGAYKVSRGLW	0.140009	0.167914	0.226043	0.25764	0.166622	0.155194	0.162106
OPRK_HUMAN_157	TMMSVDRYIAVCHPV	0.214785	0.267435	0.233261	0.214208	0.243061	0.192143	0.423187
OPRM_HUMAN_168	CTMSVDRYIAVCHPV	0.171367	0.348081	0.205801	0.239295	0.186979	0.163615	0.279734
ORN_HUMAN_122	ITLQQAEYEFLSFVR	3.19887	2.56592	2.77017	2.6934	3.39239	2.97757	4.44753
OSB11_HUMAN_62	SDHMENVYGYLMKYT	3.0591	1.71336	2.30482	2.2033	3.99375	3.01353	0.531804
OSB11_HUMAN_62_YA	SDHMENVYGALMKAT	3.08267	2.81399	3.07606	2.46841	3.50505	2.6233	0.235326
OSTP_HUMAN_225	DSRGKDSYETSQLDD	0.140365	0.220913	0.361585	0.242578	0.137214	0.146374	0.231536
OTUD4_HUMAN_460	IEESRLLYEIQNRDE	2.41115	1.9798	1.87805	2.16319	0.714412	0.15964	0.246167
P2RX6_HUMAN_64	ALLAKKGYQERDLEP	0.160437	0.228863	0.343939	0.165229	0.135918	0.098719	0.197779
P2RX7_HUMAN_343	YIGSTLSYFGLAAVF	0.156906	0.082523	0.0507527	0.0530998	0.256588	0.346221	0.569362
P2RX7_HUMAN_343_YA	AIGSTLSYFGLAAVF	0.197475	0.184371	0.236409	0.312876	0.19141	0.336969	0.428534
P55G_HUMAN_341	NEDADENYFINEEDE	0.178835	0.16324	0.194685	0.211868	0.240942	0.184155	2.66753
P73_HUMAN_28	SLEPDSTYFDLPQSS	2.40711	0.62665	0.654699	0.616113	2.73133	0.36769	5.24893
P73_HUMAN_99	SVPTHSPYAQPSSTF	0.126985	0.222799	0.168106	0.226069	0.129	3.2941	0.17332
P85A_HUMAN_467	SREYDRLYEEYTRTS	4.0612	3.06999	2.77357	3.14083	4.35684	3.90699	4.94526
P85A_HUMAN_467_YA	SREADRLYEEATRTS	2.54892	2.48879	2.37018	2.52936	2.93402	1.98441	0.529517
P85A_HUMAN_607	NENTEDQYSLVEDDE	0.271374	0.246466	0.212291	0.358917	0.136977	0.151901	0.863337
P85B_HUMAN_464	SREYDQLYEEYTRTS	3.40584	2.60008	3.31692	2.92376	4.02016	3.71044	5.71813
P85B_HUMAN_464_YA	SREADQLYEEATRTS	3.15351	2.18637	1.82875	1.73247	3.38801	1.46384	2.61849
P85B_HUMAN_605	KNETEDQYALMEDED	0.164755	0.247607	0.213652	0.190457	0.141548	0.161784	0.33011
P85B_HUMAN_655	ESSQRGCYACSVVVD	0.287868	0.343164	0.283436	0.273767	0.220141	0.343771	0.29268
PABP4_HUMAN_140	DENGSKGYAFVHFET	0.182728	0.211796	0.239749	0.247889	0.16005	0.272569	0.200044
PABP4_HUMAN_364	IVGSKPLYVALAQRK	0.173977	0.326679	0.348063	0.236267	0.745276	2.37499	0.204869
PACN1_HUMAN_394	GVRVRALYDYDGQEQ	0.146454	0.421319	0.203328	0.207621	0.117571	0.124611	0.193445
PACN1_HUMAN_394_YA	GVRVRALYDADGQEQ	0.127937	0.269796	0.312716	0.166677	0.117064	0.13276	0.121884
PAK1_HUMAN_131	VLDVLEFYNSKKTSN	0.15333	0.223676	0.183672	0.104178	0.18915	0.176901	0.168488
PAK1_HUMAN_142	KTSNSQKYMSFTDKS	0.26565	0.313617	0.304294	0.220237	0.531532	0.240743	0.284941
PAK1_HUMAN_153	TDKSAEDYNSSNALN	0.144131	0.360571	0.231197	0.234074	0.0858364	0.104543	0.250691
PAK2_HUMAN_139	SNTVKQKYLSFTPPE	0.369578	0.641742	0.15374	0.137673	0.106682	0.145509	0.464795
PAK6_HUMAN_566	KSLVGTPYWMAPEVI	2.7515	2.88345	2.27891	2.74185	0.168695	0.297905	1.72177
PARD3_HUMAN_489	IGGSAPIYVKNILPR	0.176679	0.289846	0.4722	0.264626	0.575164	2.45483	0.165958
PARK2_HUMAN_143	SPAGRSIYNSFYVYC	2.73479	1.93153	2.93124	2.2931	1.67566	1.67127	1.00215
PARK2_HUMAN_143_YA	SPAGRSIYNSFAVAC	2.44743	2.21584	2.31873	2.08014	2.89257	3.32711	0.216837
PARK7_HUMAN_67	DAKKEGPYDVVVLPG	3.13705	3.1987	2.43682	2.90543	2.11576	0.585861	0.25107
PARP1_HUMAN_907	MVSKSANYCHTSQGD	0.157271	0.25693	0.216493	0.293131	0.148351	0.174758	0.16639
PAXI_HUMAN_118	VGEEEHVYSFPNKQK	3.488	3.43976	3.23329	3.76834	3.60344	3.2665	4.94615
PAXI_HUMAN_31	FLSEETPYSYPTGNH	3.41654	3.04326	2.77477	2.61481	1.76521	3.70988	4.71054
PAXI_HUMAN_31_YA	FLSEETPYSAPTGNH	2.78679	2.68393	2.32873	2.86052	1.3618	3.29497	0.758122
PB1_HUMAN_1289	KVVDDEIYYFRKPIV	4.05656	2.57783	2.72209	2.64155	4.86749	3.90931	5.81255
PB1_HUMAN_1289_YA	KVVDDEIYAFRKPIV	3.38947	2.68135	2.69758	2.84525	3.58917	3.92614	0.877219
PB1_HUMAN_134	YKPDSPEYKAACKLW	0.136749	0.217662	0.238612	0.14575	0.21861	1.7032	0.214641
PB1_HUMAN_134_YA	AKPDSPEYKAACKLW	0.165531	0.259815	0.202524	0.16484	0.153269	1.52316	0.22813
PDCD4_HUMAN_152	DDQENCVYETVVLPL	3.04436	2.85146	2.63615	2.45309	3.83264	3.03145	4.94098
PDHA1_HUMAN_289	MELQTYRYHGHSMSD	0.154059	0.177127	0.234828	0.212608	0.122426	0.133989	0.203945
PDHA1_HUMAN_289_YA	MELQTARYHGHSMSD	0.142543	0.197388	0.23541	0.217418	0.163955	0.144562	0.198718
PDK1_HUMAN_136	AEDAKAIYDFTDTVI	3.38926	2.62027	2.46743	2.19429	3.70146	3.05296	0.640589
PDK1_HUMAN_243	ARRLCDLYYINSPEL	2.09035	0.936122	1.18803	1.97899	1.54052	0.477897	0.88794
PDK1_HUMAN_243_YA	ARRLCDLYAINSPEL	2.634	2.55797	2.82237	3.25818	2.21374	1.26153	0.168962
PDK2_HUMAN_215	AKLLCDKYYMASPDL	0.567254	0.571889	0.370105	0.608773	0.28421	0.250785	0.569555
PDK2_HUMAN_215_YA	AKLLCDKYAMASPDL	0.338405	0.196537	0.267101	0.328246	0.149697	0.518432	0.166881
PDK2_HUMAN_216	KLLCDKYYMASPDLE	0.583401	3.61898	0.561936	0.597053	0.322915	0.235512	0.424979
PDK2_HUMAN_216_YA	KLLCDKAYMASPDLE	0.174126	0.205678	0.33433	0.214623	0.230137	0.170187	0.213401
PDK3_HUMAN_211	AKMLCEQYYLVAPEL	0.718108	0.420742	0.414379	0.59447	0.332763	0.967418	3.07179
PDK3_HUMAN_211_YA	AKMLCEQYALVAPEL	0.295626	0.271033	0.336229	0.658881	0.273447	0.374202	0.629532
PDK3_HUMAN_212	KMLCEQYYLVAPELE	1.45338	0.745959	0.717291	0.931446	0.322096	0.564604	4.04625
PDK3_HUMAN_212_YA	KMLCEQAYLVAPELE	0.761589	0.29983	0.262023	0.371764	0.190494	0.145448	0.294967
PDLI1_HUMAN_144	ARVITNQYNNPAGLY	0.411988	0.23645	0.366373	0.337211	0.735807	1.98768	0.186216
PDLI1_HUMAN_144_YA	ARVITNQYNNPAGLA	0.134554	0.263035	0.191192	0.221097	0.152596	1.47726	0.203491
PDP1_HUMAN_381	DQLNDNEYTKFIPPN	3.12154	2.56134	2.81943	2.42844	2.4443	2.86601	5.05221
PDPK1_HUMAN_373	SEDDEDCYGNYDNLL	3.24305	2.32994	3.15876	2.10017	3.52641	2.8504	5.02155
PDPK1_HUMAN_373_YA	SEDDEDCYGNADNLL	2.71787	1.82324	1.88479	2.73538	1.9692	0.54883	3.57299
PDPK1_HUMAN_376	DEDCYGNYDNLLSQF	3.41858	2.23108	2.60446	2.19628	4.23515	3.5961	5.89247
PDPK1_HUMAN_376_YA	DEDCAGNYDNLLSQF	0.279781	0.244654	0.269336	2.3247	0.60917	0.78678	4.57095
PDPK1_HUMAN_9	ARTTSQLYDAVPIQS	2.79925	3.53223	2.94089	2.8038	2.57011	2.15386	0.245716
PEAK1_HUMAN_635	IVINPNAYDNLAIYK	0.244793	0.362597	0.396204	0.493984	0.99672	0.552305	0.495343
PEAK1_HUMAN_635_YA	IVINPNAYDNLAIAK	0.133385	0.202752	0.183348	0.193859	0.456531	0.149254	0.163024
PEAK1_HUMAN_641	AYDNLAIYKSFLGTS	1.25847	1.37066	3.08824	1.61819	1.34906	1.29301	0.234976
PEAK1_HUMAN_641_YA	AADNLAIYKSFLGTS	0.73764	3.47616	1.39705	0.672435	0.650577	0.856151	0.234242
PEAR1_HUMAN_925	SLSSENPYATIRDLP	3.53128	3.37018	2.88353	3.04162	4.00488	3.72826	0.281022
PECA1_HUMAN_713	KKDTETVYSEVRKAV	3.39339	2.43075	2.78034	3.65574	4.07908	3.84399	0.639396
PECR_HUMAN_179	GAARAGVYNLTKSLA	0.197681	0.321388	0.3914	0.226022	0.25697	0.170099	0.191118
PELP1_HUMAN_920	EEEDEEEYFEEEEEE	0.094856	0.179059	0.198924	0.177124	0.12393	0.0641316	0.239894
PERI_HUMAN_470	DKSSAHSYGGGGGGG	0.11006	0.273288	0.184947	0.230223	0.133443	0.127375	0.194562
PFKAL_HUMAN_640	YYTTEFLYNLYSSEG	3.40801	2.95575	2.74915	2.854	3.90817	3.54409	4.36771
PFKAL_HUMAN_640_YA	AATTEFLYNLASSEG	1.73024	2.66004	1.09265	3.10501	0.263371	0.106725	0.174274
PFKAP_HUMAN_651	NYTTDFIYQLYSEEG	3.87598	4.10717	4.33785	3.27208	3.90872	3.0393	4.37979
PFKAP_HUMAN_651_YA	NATTDFIYQLASEEG	4.37371	3.6851	3.6138	3.60269	3.68796	2.26663	1.35281
PGAM1_HUMAN_26	ENRFSGWYDADLSPA	1.83521	1.73484	1.24008	2.01839	0.198893	0.115972	0.193647
PGAM2_HUMAN_133	MDEKHPYYNSISKER	0.198741	0.422766	0.323928	0.243243	0.204303	0.132419	0.165892
PGAM2_HUMAN_133_YA	MDEKHPAYNSISKER	0.113204	0.274785	0.127889	0.168197	0.149315	0.111504	0.165373
PGAM4_HUMAN_26	ENRFSCWYDADLSPA	0.528382	0.530688	0.568235	0.451679	0.235881	0.137497	0.375808
PGFRA_HUMAN_572	ISPDGHEYIYVDPMQ	3.19278	2.78	3.13059	3.22265	2.80216	3.086	3.95024
PGFRA_HUMAN_572_YA	ISPDGHEYIAVDPMQ	0.159149	0.210424	0.192139	0.180986	0.119232	0.136591	3.9546
PGFRA_HUMAN_720	ADESTRSYVILSFEN	0.217834	0.305458	0.314164	0.305202	0.186654	0.117035	0.297788
PGFRA_HUMAN_731	SFENNGDYMDMKQAD	0.210596	0.286439	0.354112	0.260515	0.176126	0.262415	4.89615
PGFRA_HUMAN_742	KQADTTQYVPMLERK	0.135265	0.171469	0.151198	0.24833	0.161262	0.178959	0.177153
PGFRA_HUMAN_754	ERKEVSKYSDIQRSL	0.115349	0.157361	0.173771	0.21388	0.157213	0.163938	0.156819
PGFRA_HUMAN_762	SDIQRSLYDRPASYK	0.328918	1.19127	0.676672	0.824558	3.22234	2.95781	0.287725
PGFRA_HUMAN_762_YA	SDIQRSLYDRPASAK	0.159492	0.336617	0.231177	0.263044	2.78225	2.89806	0.174585
PGFRA_HUMAN_849	DIMHDSNYVSKGSTF	0.110282	0.209865	0.298186	0.193228	0.147883	0.128157	0.137307
PGFRB_HUMAN_579	VSSDGHEYIYVDPMQ	3.29575	2.48874	2.68727	2.07908	3.19637	3.07159	4.49618
PGFRB_HUMAN_579_YA	VSSDGHEYIAVDPMQ	0.181677	0.169876	0.221965	0.245458	0.111485	0.150738	4.12208
PGFRB_HUMAN_581	SDGHEYIYVDPMQLP	3.42593	2.34942	2.78155	1.75565	3.65494	3.11037	4.63758
PGFRB_HUMAN_581_YA	SDGHEAIYVDPMQLP	4.49205	2.25275	2.33352	1.9063	4.09311	3.74772	5.04878
PGFRB_HUMAN_686	IITEYCRYGDLVDYL	1.74502	1.15615	1.82692	1.45539	1.47045	2.33718	2.02925
PGFRB_HUMAN_686_YA	IITEACRYGDLVDAL	0.202062	0.273715	0.292228	0.321192	0.173383	0.213386	0.289499
PGFRB_HUMAN_740	TGESDGGYMDMSKDE	0.133392	0.160254	0.199555	0.15065	0.147818	0.150519	0.256494
PGFRB_HUMAN_751	SKDESVDYVPMLDMK	0.120101	0.167589	0.126122	0.181416	0.207157	0.65221	4.46241
PGFRB_HUMAN_763	DMKGDVKYADIESSN	0.109157	0.185816	0.199448	0.147692	0.148419	0.0829238	0.199296
PGFRB_HUMAN_771	ADIESSNYMAPYDNY	3.22208	2.70663	3.19435	3.0649	0.823057	3.18305	4.25508
PGFRB_HUMAN_771_YA	ADIESSNYMAPADNA	0.161248	0.215481	0.22101	0.247431	0.197648	2.37747	3.26798
PGFRB_HUMAN_775	SSNYMAPYDNYVPSA	2.58709	2.91629	4.79398	2.66799	0.931709	3.46079	1.84651
PGFRB_HUMAN_775_YA	SSNAMAPYDNAVPSA	0.895233	0.266336	0.319414	0.170854	0.16266	0.135144	0.195144
PGFRB_HUMAN_778	YMAPYDNYVPSAPER	3.01336	3.19228	3.1903	2.4493	1.01761	3.64642	1.2237
PGFRB_HUMAN_778_YA	AMAPADNYVPSAPER	0.113064	0.212897	0.224553	0.19084	0.10953	0.108306	0.182188
PGFRB_HUMAN_857	DIMRDSNYISKGSTF	0.147203	0.215729	0.280452	0.202124	0.191624	0.118118	0.270508
PGFRB_HUMAN_934	AHASDEIYEIMQKCW	3.24977	2.13789	2.14552	2.56929	3.54017	3.79956	5.86534
PGFRB_HUMAN_970	GEGYKKKYQQVDEEF	0.177356	0.142532	0.209448	0.228987	0.126001	0.149684	0.307442
PGFRB_HUMAN_970_YA	GEGAKKKYQQVDEEF	0.167886	0.201249	0.204387	0.28849	0.168502	0.131852	0.21246
PGFS_HUMAN_108	KELGFKRYNSLSILP	0.105983	0.114554	0.101489	0.110423	0.149588	0.139297	0.302855
PGK1_HUMAN_76	GVPMPDKYSLEPVAV	0.146277	0.185902	0.302099	0.217496	0.128274	0.110001	0.163397
PGK2_HUMAN_76	GVPMPDKYSLAPVAV	0.13277	0.156247	0.188734	0.21342	0.130439	0.124366	0.170138
PGM1_HUMAN_353	SATKIALYETPTGWK	1.62572	1.52212	2.3375	2.09914	3.71323	3.19353	3.1426
PHAG1_HUMAN_105	TLTCMQHYEEVQTSA	0.322838	0.281333	0.317318	0.286568	0.170359	0.132919	0.41873
PHAG1_HUMAN_163	GLGMEGPYEVLKDSS	3.40173	3.19307	1.9151	3.38985	1.37749	0.186838	0.614435
PHAG1_HUMAN_181	NMVEDCLYETVKEIK	3.62878	2.37572	2.43949	2.80438	3.88625	2.78167	5.22106
PHAG1_HUMAN_227	GKAEFAEYASVDRNK	2.80551	1.88081	2.07562	2.53044	3.61179	3.15026	0.519166
PHAG1_HUMAN_317	EEEISAMYSSVNKPG	3.16455	2.48918	2.80852	2.80684	3.29636	2.75453	0.52169
PHAG1_HUMAN_387	SEEPEPDYEAIQTLN	2.81003	1.91286	1.30757	1.65238	2.46547	1.8826	4.57791
PHB_HUMAN_114	FTSIGEDYDERVLPS	0.156024	0.245844	0.207905	0.2875	0.109884	0.177513	0.690998
PHB_HUMAN_249	EAAEDIAYQLSRSRN	0.162812	0.242834	0.264744	0.225035	0.107432	0.133291	0.310503
PHB2_HUMAN_128	YQRLGLDYEERVLPS	0.283195	0.338035	0.328279	0.668844	0.415103	2.54341	0.676044
PHB2_HUMAN_128_YA	AQRLGLDYEERVLPS	0.154936	0.214709	0.257459	0.225853	0.127376	0.127082	0.249564
PHF14_HUMAN_206	ELNDMDDYDSEDDND	0.111929	0.138378	0.189185	0.16481	0.113893	0.129521	0.171496
PHF8_HUMAN_704	EFDIEEDYTTDEDMV	0.159909	0.197311	0.163555	0.293211	0.179904	0.119602	4.37652
PI4KA_HUMAN_1154	NRYAGEVYGMIRFSG	2.54611	2.08204	2.3793	2.11547	3.53785	1.67923	0.49601
PI4KA_HUMAN_1154_YA	NRAAGEVYGMIRFSG	2.65882	2.20414	2.57045	2.27827	3.2791	1.93625	0.359901
PI51C_HUMAN_639	DAPATDIYFPTDERS	2.56751	2.2898	3.22071	2.42569	1.74666	1.64875	1.59542
PI51C_HUMAN_649	TDERSWVYSPLHYSA	3.3408	3.39329	2.79304	2.6836	3.49084	2.78192	0.344381
PI51C_HUMAN_649_YA	TDERSWVYSPLHASA	3.2143	3.80506	2.9865	2.94746	3.48636	1.01751	0.266728
PIK3R1_HUMAN_368	STKMHGDYTLTLRKG	0.159677	0.250476	0.382191	0.260174	0.179457	0.169418	0.368526
PIP5K1B_HUMAN_105	FGIKPDDYLYSICSE	2.81426	1.64171	1.97992	1.87463	1.82491	0.608592	1.08363
PIP5K1B_HUMAN_105_YA	FGIKPDDYLASICSE	0.134502	0.0675753	0.0757444	0.0583422	0.174311	0.153309	0.208538
PKD1_HUMAN_4237	NQATEDVYQLEQQLH	3.23325	3.23408	2.72631	3.03769	3.09335	0.131064	0.212934
PKDCC_HUMAN_148	AQYMGSGYTKAVYRV	0.162157	0.180987	0.271067	0.239164	0.169778	1.91655	0.142116
PKDCC_HUMAN_148_YA	AQAMGSGYTKAVARV	0.115984	0.212159	0.268469	0.166256	0.127347	0.136696	0.21049
PKP4_HUMAN_372	GQQQYDIYERMVPPR	3.21683	3.29581	2.65222	2.59796	3.28785	3.20076	5.09305
PKP4_HUMAN_372_YA	GQQQADIYERMVPPR	3.54369	3.75474	2.18929	2.6956	3.59699	3.57741	4.04647
PKP4_HUMAN_415	DLHITPIYEGRTYYS	2.82327	2.11961	2.06413	1.80678	3.70789	2.85916	0.267271
PKP4_HUMAN_415_YA	DLHITPIYEGRTAAS	3.39636	3.41255	3.517	3.01837	4.19328	2.12083	0.196557
PKP4_HUMAN_478	ALNTTATYAEPYRPI	2.89431	2.70938	2.86414	2.75634	3.7129	3.2548	0.377078
PKP4_HUMAN_478_YA	ALNTTATYAEPARPI	1.40127	1.49895	2.32905	1.7973	2.92354	3.33119	0.259727
PLCG1_HUMAN_1003	KGKKFLQYNRLQLSR	0.166266	0.132714	0.15611	0.133433	0.394396	0.215257	0.267606
PLCG1_HUMAN_1253	EGSFESRYQQPFEDF	0.235254	0.166947	0.236053	0.575573	0.133146	0.150037	0.251518
PLCG1_HUMAN_506	DPVNHEWYPHYFVLT	0.276542	0.270428	0.222692	0.975635	0.195047	0.412702	0.557137
PLCG1_HUMAN_506_YA	DPVNHEWYPHAFVLT	0.186177	0.358611	0.352902	0.255176	0.339557	0.141339	0.305404
PLCG1_HUMAN_771	IGTAEPDYGALYEGR	3.7733	2.98849	2.73547	2.75458	4.54295	3.29829	2.2023
PLCG1_HUMAN_771_YA	IGTAEPDYGALAEGR	2.94746	2.68315	3.03094	2.68174	1.21522	0.621526	0.262613
PLCG1_HUMAN_775	EPDYGALYEGRNPGF	3.39781	2.5346	2.3596	2.65783	4.16108	3.51894	1.97468
PLCG1_HUMAN_775_YA	EPDAGALYEGRNPGF	1.30026	2.87411	1.24061	2.36333	3.03405	0.250458	0.157794
PLCG1_HUMAN_783	EGRNPGFYVEANPMP	0.18964	0.176884	0.28398	0.0966431	0.160254	0.200555	0.209881
PLCG1_HUMAN_977	IGTERACYRDMSSFP	0.158005	0.212651	0.257442	0.196638	0.14743	0.249936	0.19987
PLCG2_HUMAN_1245	NENQLQLYQEKCNKR	0.190162	0.179361	0.253605	0.137902	0.4856	0.182084	0.221687
PLCG2_HUMAN_753	ERDINSLYDVSRMYV	3.23783	2.34433	2.644	2.60147	3.87339	3.25075	0.184357
PLCG2_HUMAN_753_YA	ERDINSLYDVSRMAV	3.10922	2.59729	2.71477	2.94798	3.46433	3.30385	0.179772
PLD2_HUMAN_415	ALGINSGYSKRALML	0.126359	0.219958	0.291076	0.153377	0.132785	0.126624	0.187483
PLD2_HUMAN_511	FFWLGKDYSNLITKD	0.177183	0.25058	0.201205	0.164471	0.168293	0.193009	0.282211
PLEC_HUMAN_3033	AKGGELVYTDSEARD	1.30642	1.33107	0.789545	1.72746	0.20166	0.608694	0.215672
PLEC_HUMAN_4393	SVGSSSSYPISPAVS	0.119484	0.281862	0.167444	0.224123	0.130238	0.172481	0.149712
PLEC_HUMAN_4615	TKGYYSPYSVSGSGS	2.17588	2.92949	2.29676	2.34692	2.22936	2.85746	0.207589
PLEC_HUMAN_4615_YA	TKGAASPYSVSGSGS	0.224436	0.286053	0.32682	0.298788	0.166253	0.179257	0.22789
PLEKHG2_HUMAN_489	SEPVKDPYVMFPQNA	2.85666	2.94231	2.79397	2.95538	0.505149	0.150983	0.231909
PLK4_HUMAN_177	TLCGTPNYISPEIAT	0.224246	0.182582	0.209535	0.379263	0.186528	1.16493	0.513147
PLOD2_HUMAN_323	DILLTLDYPKEALKL	0.146938	0.169822	0.309324	0.219309	0.147406	0.193968	0.154468
PLS4_HUMAN_83	GGIHPVRYQPGKYPM	0.211349	0.1717	0.252555	0.208903	0.432183	0.330208	0.3064
PLS4_HUMAN_83_YA	GGIHPVRYQPGKAPM	0.26487	0.309061	0.320883	0.231218	0.60542	0.330564	0.240011
PLS4_HUMAN_88	VRYQPGKYPMPNQSV	0.181864	0.215553	0.216583	0.200958	0.278996	0.557335	0.171335
PLS4_HUMAN_88_YA	VRAQPGKYPMPNQSV	0.191711	0.246926	0.288511	0.264117	0.305511	0.198129	0.173719
PLSI_HUMAN_30	IDIDNSGYVSDYELQ	2.66684	2.31079	1.69371	2.31759	0.127022	0.136201	4.2493
PLSI_HUMAN_30_YA	IDIDNSGYVSDAELQ	0.147765	0.164658	0.26047	0.138069	0.170529	0.126799	0.207289
PLSL_HUMAN_124	SYSEEEKYAFVNWIN	2.52857	1.84582	2.72944	2.72691	2.69989	2.72379	3.24641
PLSL_HUMAN_124_YA	SASEEEKYAFVNWIN	2.0162	1.09314	1.76932	2.57682	2.95015	3.48285	1.35749
PLSL_HUMAN_28	VDTDGNGYISFNELN	2.80181	2.16343	1.9985	2.29828	0.784677	2.45952	2.51579
PLXB1_HUMAN_1708	DSVGEPLYMLFRGIK	2.86266	2.97645	2.26905	1.89093	3.30317	2.47495	2.00354
PLXB1_HUMAN_1732	SVTGKAKYTLNDNRL	0.169397	0.535148	0.224658	0.250023	0.157444	0.127378	0.220552
POL_HV190_132	DNKVSQNYPIVQNAQ	0.110255	0.0914605	0.0993937	0.113329	0.157357	0.157031	0.165669
POL_HV192_130	KGKVSQNYPIVQNLQ	0.19945	0.253942	0.166689	0.193418	0.239427	0.146716	0.207862
POL_HV193_128	EKGVSQNYPIVQNLQ	0.120478	0.257603	0.309827	0.155058	0.135497	0.11553	0.179542
POL_HV19N_131	SNPVSQNYPIVQNAQ	0.127946	0.201457	0.252098	0.227909	0.118276	0.117967	0.172167
POL_HV1AN_130	ARQAGQNYPIVSNAQ	0.150071	0.349523	0.359353	0.189046	0.166411	0.160334	0.189387
POL_HV1H2_132	SNQVSQNYPIVQNIQ	0.114318	0.167696	0.19189	0.17795	0.105596	0.100095	0.185167
POL_HV1J3_132	SSKVSQNYPIVQNIQ	0.159624	0.159978	0.33389	0.244433	0.129499	0.142611	0.193631
POL_HV1LW_132	SSQVSQNYPIVQNIQ	0.17806	0.246962	0.18911	0.138085	0.195291	0.125003	0.150327
POL_HV1M2_132	SKGVSQNYPILQNLQ	0.134948	0.194773	0.193896	0.176262	0.0999378	0.108837	0.154147
POL_HV1MA_138	SSSVSQNYPIVQNAQ	0.111149	0.166774	0.159533	0.152867	0.118838	0.138068	0.142209
POL_HV1MN_135	SSQVSQNYPIVQNIE	0.177164	0.211598	0.228593	0.303281	0.129115	0.125291	0.167619
POL_HV1MP_128	DKEVSQNYPIVQNIQ	0.133691	0.161005	0.216198	0.262599	0.144364	0.56506	0.191295
POL_HV1RH_132	GSQVSQNYPIVQNLQ	0.106759	0.246065	0.182083	0.179773	0.144266	0.0882157	0.186379
POL_HV1SE_132	SNQVSQNYPIVQNAQ	0.149422	0.204097	0.175024	0.230103	0.165638	0.121856	0.148927
POL_HV1U4_128	NTGSSQNYPIVQNAQ	0.118111	0.124193	0.253267	0.175076	0.110767	0.167427	0.181843
POL_HV1V9_134	DSKISQNYPIVQNAQ	0.123682	0.16066	0.246353	0.212633	0.142267	0.10972	0.164162
POL_HV1VI_128	DKGVSQNYPIVQNLQ	0.105924	0.189729	0.191464	0.189029	0.112021	0.103	0.137485
POL_HV1Y2_132	SSQVSQNYPIVQNLQ	0.113447	0.0833053	0.10734	0.103572	0.133431	0.1145	0.179366
POL_HV1YB_134	DSSISRNYPLVQNAQ	0.164618	0.197976	0.205531	0.252716	0.129161	0.128559	0.143168
POL_HV1YF_134	DSNISRNYPLVQTAQ	0.118121	0.202766	0.226053	0.184721	0.124639	0.0890029	0.167622
POL_HV1Z2_133	NSQVSQNYPIVQNLQ	0.160978	0.226452	0.283335	0.257301	0.165735	0.121809	0.167365
POL_HV2D2_130	APPSGGNYPVQQLAG	0.134636	0.267373	0.19497	0.285766	0.149487	0.137954	0.161129
POL_HV2EH_130	KPTSRLAYPVQQIAG	0.157844	0.176402	0.181273	0.143156	0.313256	0.26854	0.274051
POL_HV2RO_135	SSEKGGNYPVQHVGG	0.145726	0.217348	0.188792	0.16211	0.129057	0.106475	0.179673
POL_HV2UC_130	APPSGGNYPVQQIAG	0.111634	0.291201	0.216711	0.204994	0.173843	0.173744	0.161712
PP14B_HUMAN_29	GGPGPRVYFQSPPGA	0.103374	0.472593	0.1002	0.310806	0.128321	0.149682	0.237096
PP1A_HUMAN_306	ADKNKGKYGQFSGLN	0.547413	0.361777	0.686029	0.372593	0.372813	0.15937	0.18785
PP1R8_HUMAN_264	FAFSGGLYGGLPPTH	3.65987	5.61697	3.34059	4.17638	3.93504	1.70294	0.248211
PP1R8_HUMAN_335	NEPKKKKYAKEAWPG	0.145232	0.129436	0.154368	0.229837	0.153597	0.0925704	0.226521
PP2AA_HUMAN_307	VTRRTPDYFLGGGGG	0.131584	0.314761	0.142755	0.299138	0.167715	0.167567	0.227424
PPIP2_HUMAN_323	SSPDDPNYSLVDDYS	0.69353	0.657233	0.422498	1.19179	0.386758	0.439917	4.40227
PPIP2_HUMAN_323_YA	SSPDDPNYSLVDDAS	0.151527	0.14506	0.157346	0.167058	0.124159	0.133084	3.06772
PPIP2_HUMAN_329	NYSLVDDYSLLYQGG	3.5698	2.62989	2.7149	2.85105	3.63356	3.13565	5.04945
PPIP2_HUMAN_329_YA	NASLVDDYSLLAQGG	1.54557	2.08263	1.89185	1.76853	0.260246	0.190143	2.03462
PR15A_HUMAN_262	SDPRSWEYRSGEASE	0.141376	0.185257	0.436268	0.301081	0.11351	0.102929	0.173419
PR15A_HUMAN_391	VFLKSWVYQPGEDTE	0.171387	0.292784	0.268336	0.257812	0.185052	0.176413	0.208278
PR15A_HUMAN_434	AFLKAWVYRPGEDTE	0.140094	0.200655	0.200147	0.194346	0.113752	0.112062	0.152536
PR15A_HUMAN_512	CPFRVAIYVPGEKPP	0.241814	0.504336	0.265482	0.296455	0.203749	0.243777	0.367198
PRC2A_HUMAN_1094	TRSEGSEYEEIPKRR	2.77536	2.36947	2.65695	2.36795	4.55779	3.19984	4.39952
PRDX1_HUMAN_194	DVQKSKEYFSKQKGG	0.132068	0.161996	0.249291	0.272188	0.161823	0.146449	0.175263
PRDX6_HUMAN_89	WSKDINAYNCEEPTE	0.248195	0.29071	0.25264	0.322798	0.188015	0.163344	0.149549
PRMT5_HUMAN_297	NRPPPNAYELFAKGY	1.21391	1.70972	1.90872	1.42298	0.640881	0.194476	0.19218
PRMT5_HUMAN_297_YA	NRPPPNAYELFAKGA	1.28799	2.14965	1.98853	2.01458	0.72593	0.145171	0.220439
PRMT5_HUMAN_304	YELFAKGYEDYLQSP	0.687738	1.01078	1.03629	0.848683	0.224205	1.63626	4.67003
PRMT5_HUMAN_304_YA	AELFAKGYEDALQSP	0.139785	0.182997	0.417093	0.187746	0.114265	0.130371	0.186467
PRMT5_HUMAN_307	FAKGYEDYLQSPLQP	0.20812	0.237768	0.317845	0.275281	0.187519	2.73868	4.10618
PRMT5_HUMAN_307_YA	FAKGAEDYLQSPLQP	0.262082	0.260233	0.201502	0.360937	0.142053	2.58777	2.50488
PROF1_HUMAN_129	GLINKKCYEMASHLR	0.18346	0.210013	0.21101	0.182202	0.207623	0.253806	0.299526
PROM1_HUMAN_852	GYHKDHVYGIHNPVM	3.36987	2.3646	2.95872	3.90989	3.76877	2.05599	0.173984
PROM1_HUMAN_852_YA	GAHKDHVYGIHNPVM	2.82873	3.07879	3.69257	3.06169	2.48089	1.05679	0.173981
PRP4B_HUMAN_140	MGLILQGYESGSEEE	0.135155	0.156527	0.086672	0.215075	0.117792	0.112969	0.214927
PRP4B_HUMAN_849	ADNDITPYLVSRFYR	0.952823	1.34323	0.969686	1.50285	0.234356	2.11002	0.744779
PRP4B_HUMAN_849_YA	ADNDITPYLVSRFAR	0.402501	0.84891	0.642235	0.988229	0.183161	1.64192	0.188032
PRS4_HUMAN_439	EGTPEGLYLGGGGGG	0.18678	0.2978	0.241563	0.199595	0.177482	0.141352	0.211804
PSA2_HUMAN_24	GKLVQIEYALAAVAG	0.187576	0.192801	0.168219	0.177783	0.13093	2.60897	0.197498
PSA2_HUMAN_6	GGMAERGYSFSLTTF	0.156054	0.229019	0.182425	0.229093	0.209105	0.133499	0.312154
PSA2_HUMAN_76	TKHIGLVYSGMGPDY	3.07237	3.24746	3.40614	2.90654	2.11784	0.609779	0.256499
PSA2_HUMAN_76_YA	TKHIGLVYSGMGPDA	2.74825	3.08623	3.49784	3.1617	1.01091	0.243344	0.127667
PSA6_HUMAN_159	YKCDPAGYYCGFKAT	3.16465	2.32498	2.63321	2.39474	3.77126	2.82818	1.30085
PSA6_HUMAN_159_YA	AKCDPAGYACGFKAT	0.108686	0.211066	0.19928	0.147833	0.192513	1.84955	0.235407
PSB1_HUMAN_150	EEGKGAVYSFDPVGS	3.53952	2.88817	2.47224	2.54728	1.20536	0.184156	0.155249
PSB4_HUMAN_102	MLGASGDYADFQYLK	3.4402	2.15353	2.28036	3.23704	3.94487	4.48023	2.95964
PSB4_HUMAN_102_YA	MLGASGDYADFQALK	3.04576	2.67653	3.32773	2.51697	4.11227	3.58162	2.90147
PSMA7_HUMAN_106	EDPVTVEYITRYIAS	0.556756	1.09897	0.50265	0.848005	0.407955	0.503085	0.375457
PSMA7_HUMAN_106_YA	EDPVTVEYITRAIAS	0.176275	1.22475	0.309192	0.246051	0.161879	0.119481	0.188128
PTBP1_HUMAN_127	VLRGQPIYIQFSNHK	3.32249	2.59502	4.12108	3.92564	3.11025	2.84837	0.46834
PTEN_HUMAN_155	AQEALDFYGEVRTRD	3.16908	2.34717	2.78279	1.71282	3.0656	0.456038	0.251789
PTEN_HUMAN_174	TIPSQRRYVYYYSYL	1.0225	0.329152	0.510322	0.522481	0.911143	0.703378	0.68095
PTEN_HUMAN_174_YA	TIPSQRRYVAAASAL	0.139488	0.312366	0.193167	0.164345	0.0889911	0.0742503	0.16945
PTEN_HUMAN_27	GFDLDLTYIYPNIIA	0.528097	0.366458	0.454599	1.21606	0.3467	0.732086	1.41903
PTEN_HUMAN_27_YA	GFDLDLTYIAPNIIA	0.851533	0.312892	0.528352	0.592638	2.04429	2.51476	1.1064
PTEN_HUMAN_336	NKDKANRYFSPNFKV	0.16949	0.16836	0.250988	0.159442	0.263039	0.215254	0.190343
PTEN_HUMAN_377	SDNEPDHYRYSDTTD	0.137899	0.283708	0.207334	0.217231	0.120839	0.11664	0.171818
PTEN_HUMAN_377_YA	SDNEPDHYRASDTTD	0.159353	0.286956	0.23151	0.239786	0.130331	0.177207	0.186457
PTEN_HUMAN_46	AERLEGVYRNNIDDV	0.21936	0.395377	0.300832	0.416656	0.137564	0.127717	0.135464
PTGS2_HUMAN_446	DQSRQMKYQSFNEYR	0.192367	0.267312	0.239515	0.250858	0.174811	1.77533	0.149075
PTGS2_HUMAN_446_YA	DQSRQMKYQSFNEAR	0.168348	0.276802	0.223701	0.241445	1.57285	0.172207	0.210591
PTK2_HUMAN_1007	KMKLAQQYVMTSLQQ	0.270869	0.389279	0.367714	0.260998	0.271741	0.195447	0.183286
PTK2_HUMAN_194	ALEKKSNYEVLEKDV	0.191003	0.160017	0.0725192	0.197003	0.146286	0.148419	0.169761
PTK2_HUMAN_441	GDVHQGIYMSPENPA	2.86124	2.53361	2.55908	3.19855	3.21467	3.06914	2.52969
PTK6_HUMAN_114	SEKPSADYVLSVRDT	0.0969838	0.184506	0.143462	0.173449	0.0832846	0.146996	0.192671
PTK6_HUMAN_351	SHDHNIPYKWTAPEA	0.165126	0.595006	0.234007	0.467564	0.125924	0.132743	0.160708
PTK6_HUMAN_61	GGAVAQGYVPHNYLA	0.135479	0.168372	0.152814	0.126611	0.137985	0.125946	0.168494
PTK6_HUMAN_61_YA	GGAVAQGYVPHNALA	0.127098	0.193849	0.174482	0.206745	0.220289	0.124396	0.133269
PTK7_HUMAN_960	KDVYNSEYYHFRQAW	3.51136	3.10191	3.13534	3.21278	3.89965	4.00132	4.72045
PTK7_HUMAN_960_YA	KDVANSEYAHFRQAW	2.63141	2.52669	2.18123	2.38647	3.33482	3.33357	0.648311
PTK7_HUMAN_961	DVYNSEYYHFRQAWV	3.295	2.13199	3.1345	2.35584	3.91732	3.30466	4.8266
PTK7_HUMAN_961_YA	DVANSEAYHFRQAWV	0.212571	0.374293	0.171829	0.318551	0.128521	0.137684	0.317977
PTN1_HUMAN_20	SGSWAAIYQDIRHEA	3.46084	2.44888	5.24222	2.37049	3.95317	3.61691	0.933997
PTN11_HUMAN_546	SKRKGHEYTNIKYSL	0.773875	0.422925	0.905318	0.301677	1.15737	0.523611	0.24246
PTN11_HUMAN_546_YA	SKRKGHEYTNIKASL	0.56367	0.30233	0.613431	0.409023	1.25929	0.589955	0.324977
PTN11_HUMAN_62	KIQNTGDYYDLYGGE	3.71582	3.78462	2.77007	4.7142	3.71624	2.53689	5.31196
PTN11_HUMAN_62_YA	KIQNTGDYADLAGGE	0.127867	0.176154	0.208529	0.197716	0.115406	0.54152	0.432228
PTN11_HUMAN_66	TGDYYDLYGGEKFAT	3.99119	2.74654	3.15465	2.48101	4.47234	3.89013	5.68918
PTN11_HUMAN_66_YA	TGDAADLYGGEKFAT	1.19571	1.85491	1.84881	2.25895	0.740018	0.103725	0.19661
PTN18_HUMAN_389	SAEEAPLYSKVTPRA	1.68844	3.12835	2.68628	2.7388	2.44914	2.50542	0.825361
PTN18_HUMAN_426	SPAGSGAYEDVAGGA	0.126383	0.221556	0.227966	0.322273	0.137112	0.113432	0.51538
PTN6_HUMAN_377	MQRAYGPYSVTNCGE	0.630461	0.76556	1.40304	0.925594	0.200053	0.406667	0.156853
PTN6_HUMAN_377_YA	MQRAAGPYSVTNCGE	0.186003	0.311112	0.271145	0.334295	0.163676	0.17414	0.183967
PTN6_HUMAN_564	SKHKEDVYENLHTKN	3.67693	2.41467	3.09482	2.8948	4.26018	3.27934	1.20507
PTN6_HUMAN_64	SGDFYDLYGGEKFAT	3.82139	2.9377	2.82912	2.85609	4.76954	0.413224	0.442384
PTN6_HUMAN_64_YA	SGDFADLYGGEKFAT	2.71525	3.14806	2.83009	2.68326	2.30985	0.147133	0.183611
PTPN18_HUMAN_281	AVQTEEQYRFLYHTV	3.0367	2.38056	3.71643	2.78848	3.08813	2.88256	0.520528
PTPN18_HUMAN_281_YA	AVQTEEQYRFLAHTV	0.134536	0.214718	0.256078	0.27479	0.171741	2.12836	0.158681
PTPN18_HUMAN_354	GHAMADTYAVVQKRG	3.40821	2.9771	2.56165	3.61048	3.86448	3.76828	0.187694
PTPRA_HUMAN_798	YIDAFSDYANFKGGG	3.47717	3.08214	2.93066	3.08144	3.68514	3.25938	4.39204
PTPRA_HUMAN_798_YA	AIDAFSDYANFKGGG	3.56293	2.82124	2.86421	2.61307	3.3972	3.36019	1.77939
PTPRC_HUMAN_1216	MVSTFEQYQFLYDVI	3.97643	3.1167	3.86315	2.82295	4.03745	3.53297	5.14217
PTPRC_HUMAN_1216_YA	MVSTFEQYQFLADVI	2.13066	2.0926	1.50325	2.05203	2.23582	3.11665	4.57877
PTPRC_HUMAN_681	FNQNKNRYVDILPYD	0.15354	0.207772	0.209076	0.333581	0.179436	0.674372	0.235569
PTPRC_HUMAN_681_YA	FNQNKNRYVDILPAD	0.155974	0.128062	0.22422	0.204819	0.165486	0.142432	0.279485
PTPRE_HUMAN_696	FIDIFSDYANFKGGG	2.99172	2.15284	1.75939	1.69622	3.82791	3.59755	2.74917
PTPRJ_HUMAN_1311	DSKVDLIYQNTTAMT	3.83511	3.33865	3.32278	2.87048	4.31051	3.29134	1.1974
PTPRJ_HUMAN_1320	NTTAMTIYENLAPVT	3.59025	2.83821	2.69893	2.63625	3.93913	3.87702	1.64867
PTPS_HUMAN_128	VLPVGVLYKVKVYET	0.404496	0.429382	0.435771	0.603605	0.47612	0.366386	0.504713
PTPS_HUMAN_128_YA	VLPVGVLYKVKVAET	0.201025	0.295563	0.264372	0.299697	0.22389	0.175539	0.297085
PTRF_HUMAN_308	FTPDHVVYARSKTAV	0.177579	0.255292	0.32252	0.155287	0.995535	2.57378	0.170791
PUR6_HUMAN_22	EGKTKEVYELLDSPG	2.63948	2.5213	2.00271	2.48245	1.25488	0.171982	0.600213
PVR_HUMAN_398	SANGHVSYSAVSREN	0.148341	0.28395	0.22218	0.186743	0.146225	0.208995	0.140984
PYGB_HUMAN_197	WEKARPEYMLPVHFY	0.158676	0.172469	0.292298	0.356397	0.147712	1.29373	0.551554
PYGB_HUMAN_197_YA	WEKARPEYMLPVHFA	0.111187	0.211066	0.23478	0.267876	0.152001	2.84625	2.50378
PYGL_HUMAN_204	FMLPVHFYGKVEHTN	0.600026	0.725409	0.798984	0.649101	0.491577	0.200871	0.496105
PYGM_HUMAN_204	FTLPVHFYGHVEHTS	0.362831	0.376146	0.682655	0.428684	0.25613	0.244016	0.527446
PYGM_HUMAN_473	KTIFKDFYELEPHKF	2.86448	0.793125	0.728157	1.0214	0.669556	0.193412	0.176201
RAD51_HUMAN_315	ETRICKIYDSPCLPE	2.87289	2.69804	3.33932	3.03878	3.32338	3.26868	0.345316
RAD52_HUMAN_104	DLNNGKFYVGVCAFV	0.1631	0.247442	0.306394	0.193679	0.181694	0.107597	0.335132
RAD9A_HUMAN_28	SRIGDELYLEPLEDG	0.146269	0.170614	0.17869	0.170189	0.15127	0.374645	2.59576
RAF1_HUMAN_341	GQRDSSYYWEIEASE	2.4404	1.64146	2.14194	1.78053	1.53014	0.216821	4.43791
RAF1_HUMAN_341_YA	GQRDSSAYWEIEASE	1.89024	1.50106	1.61067	2.45667	0.181772	0.153876	3.09317
RAI3_HUMAN_317	EETGDTLYAPYSTHF	4.60723	2.56463	2.91825	2.52971	3.95439	3.5319	3.45765
RAI3_HUMAN_317_YA	EETGDTLYAPASTHF	3.04604	1.68365	1.68322	5.27553	3.9818	3.70051	0.713696
RAI3_HUMAN_320	GDTLYAPYSTHFQLQ	3.7882	3.21226	2.43246	2.73749	3.78016	3.06395	0.652338
RAI3_HUMAN_320_YA	GDTLAAPYSTHFQLQ	0.584636	0.853362	1.1463	0.853495	0.186322	0.153006	0.213929
RAI3_HUMAN_347	AHAWPSPYKDYEVKK	0.237094	0.372329	0.729175	0.338689	0.203774	0.152398	0.148794
RAI3_HUMAN_347_YA	AHAWPSPYKDAEVKK	0.145511	0.269518	0.438714	0.202641	0.185346	0.108937	0.174455
RAI3_HUMAN_350	WPSPYKDYEVKKEGS	0.2473	0.463591	0.785057	0.387245	0.154161	0.165803	0.221443
RAI3_HUMAN_350_YA	WPSPAKDYEVKKEGS	0.168449	0.233552	0.372364	0.168796	0.16692	0.153772	0.276434
RAPH1_HUMAN_1226	GGSHISGYATLRRGP	0.146972	0.213356	0.223919	0.121233	0.152569	0.171526	0.129964
RAPH1_HUMAN_456	NVYYGQDYRNKYKAP	2.16714	2.22851	3.07549	2.00334	3.33484	3.3141	0.266618
RAPH1_HUMAN_456_YA	NVAAGQDYRNKAKAP	0.12737	0.24474	0.191618	0.199045	0.612193	0.11431	0.188871
RAPSN_HUMAN_196	AAELVNNYGKGWSLK	0.133525	0.325245	0.13511	0.233609	0.100356	0.112743	0.166197
RASA1_HUMAN_615	VKHFTNPYCNIYLNS	3.26138	1.66417	2.692	2.12951	1.56043	1.26112	1.04127
RASA1_HUMAN_615_YA	VKHFTNPYCNIALNS	0.59985	0.828795	1.60409	1.18072	0.409348	0.340429	0.68683
RBM15_HUMAN_266	SPLDKDTYPPSASVV	0.134511	0.236401	0.193654	0.134271	0.181718	0.15179	0.13595
RBM3_HUMAN_155	GGNYRDNYDNGGGGG	0.149248	0.262233	0.200353	0.230397	0.193434	0.123453	0.248058
RBM3_HUMAN_155_YA	GGNARDNYDNGGGGG	0.135708	0.232057	0.207023	0.268217	0.104328	0.142918	0.155167
RBM39_HUMAN_95	DRRFRGRYRSPYSGP	0.117258	0.382358	0.315699	0.352047	0.140457	0.177966	0.197635
RBM39_HUMAN_95_YA	DRRFRGRYRSPASGP	0.130312	0.280595	0.145498	0.182932	0.217289	0.141467	0.148237
RBP10_HUMAN_362	SPKSQDSYPGSPSLS	0.144999	0.269606	0.152927	0.171255	0.0892488	0.0739958	0.191034
RBP2_HUMAN_2666	CYKNRPDYVSEEEED	0.164184	0.133471	0.206698	0.150927	0.320772	0.110814	0.282983
RBP2_HUMAN_2666_YA	CAKNRPDYVSEEEED	0.306914	0.164777	0.15259	0.279971	0.396103	0.141665	0.284458
RD23B_HUMAN_202	TEIMSMGYEREQVIA	0.11698	0.211119	0.124595	0.195814	0.074751	0.139141	0.0895239
REPS1_HUMAN_288	ITDEQRQYYVNQFKT	0.37527	0.336118	0.695147	0.421577	0.234527	1.42796	0.314339
REPS1_HUMAN_288_YA	ITDEQRQYAVNQFKT	0.119972	0.235778	0.216596	0.245166	0.111546	2.04719	0.153272
REQU_HUMAN_172	DDLDDEDYEEDTPKR	0.135753	0.181229	0.144093	0.210068	0.0977271	0.137964	1.42021
RERE_HUMAN_1259	ALRTLSEYARPHVMS	0.157675	0.222898	0.217185	0.199192	0.277839	3.16083	0.414
RET_HUMAN_1015	MMVKRRDYLDLAAST	0.173686	0.228294	0.272269	0.301086	0.194403	0.145896	0.17757
RET_HUMAN_1029	TPSDSLIYDDGLSEE	2.42505	2.53931	1.87784	3.04062	1.29819	0.831486	0.231933
RET_HUMAN_1062	TWIENKLYGMSDPNW	3.14275	2.30555	2.55191	2.2526	2.09906	2.74152	0.169176
RET_HUMAN_1090	TNTGFPRYPNDSVYA	2.76979	2.76541	2.9093	3.67711	2.28158	0.824502	0.146845
[truncated: 612 more rows]
