# Supplementary material for: Fine-tuning of substrate preferences of the Src-family kinase Lck revealed through a high-throughput specificity screen
Source: eLife. 2018 Mar 16;7:e35190. doi: 10.7554/eLife.35190 (PMC5889215; doi:10.7554/eLife.35190)
Supplement: Figure 5—source data 1. — For all analyses, the foreground sequence set corresponds to those sequences with an enrichment score greater than 1.5 in the bacterial surface-display screens, and the background sequence set is the full Human-pTyr library. Only motifs with a minimum occurrence of 20 and a significance threshold of 0.000001 were considered. Motifs containing multiple tyrosine residues were omitted for clarity, as they cannot be unambiguously interpreted. [file elife-35190-fig5-data1.xlsx]

## Sheet: Sheet1
	Kinase	Motif	Motif Score	Foreground Matches	Foreground Size	Background Matches	Background Size	Fold Increase
	c-Src	......IY.......	16	158	814	209	2588	2.4
		......LY.......	16	139	656	221	2379	2.28
		......VY.......	16	137	517	216	2158	2.65
		......TY.......	15.35	75	380	136	1942	2.82
		.......Y..F....	9.12	45	305	96	1806	2.78
		....E..Y.......	8.85	64	260	193	1710	2.18
	Lck	......IY.......	16	148	714	209	2588	2.57
		......LY.......	16	137	566	221	2379	2.61
		......VY.......	16	127	429	216	2158	2.96
		......TY.......	16	69	302	136	1942	3.26
		....E..Y.......	6.93	50	205	198	1751	2.16
	c-Abl	......IY.......	16	144	766	209	2588	2.33
		.......Y..P....	14.95	138	622	262	2379	2.01
		......LY.......	11.11	94	484	197	2117	2.09
		......VY.......	11.66	86	390	192	1920	2.21
		.......YA......	10	61	304	143	1728	2.42
		....E..Y.......	6.98	49	195	172	1492	2.18
	ZAP-70	.......YE......	16	172	584	332	2588	2.3
		......DY.......	14.75	96	412	223	2256	2.36
		......EY.......	11.78	76	316	209	2033	2.34
		....E..Y.......	10.59	69	240	230	1824	2.28
		....D..Y.......	10.96	53	171	185	1594	2.67
