# Supplementary material for: Fine-tuning of substrate preferences of the Src-family kinase Lck revealed through a high-throughput specificity screen
Source: eLife. 2018 Mar 16;7:e35190. doi: 10.7554/eLife.35190 (PMC5889215; doi:10.7554/eLife.35190)
Supplement: Figure 5—source data 2. — The kinase name, phosphosite designation, and enrichment score are given, alongside the sequence, as annotated in the PhosphoSitePlus database. [file elife-35190-fig5-data2.xlsx]

## Sheet: Sheet1
Kinase	Name	-7	-6	-5	-4	-3	-2	-1	0	1	2	3	4	5	6	7	Enrichment
c-Abl	JUNB_HUMAN_182	G	P	E	P	P	P	V	y	T	N	L	S	S	y	S	3.50963
c-Abl	NCK1_HUMAN_105	V	D	P	G	E	R	L	y	D	L	N	M	P	A	y	3.42867
c-Abl	STX17_HUMAN_157	S	Q	S	L	T	Q	I	y	A	L	P	E	I	P	Q	3.36958
c-Abl	CAV1_HUMAN_14	V	D	s	E	G	H	L	y	t	V	P	I	R	E	Q	3.3339
c-Abl	PLCG1_HUMAN_771	I	G	t	A	E	P	d	y	G	A	L	y	E	G	R	3.29829
c-Abl	ESR1_HUMAN_219	s	I	Q	G	H	N	D	y	M	C	P	A	T	N	Q	3.26917
c-Abl	RAD51_HUMAN_315	E	t	R	I	C	K	I	y	D	S	P	C	L	P	E	3.26868
c-Abl	CD19_HUMAN_508	E	D	M	R	G	I	L	y	A	A	P	Q	L	R	S	3.2508
c-Abl	MDM2_HUMAN_405	S	T	S	S	S	I	I	y	s	s	Q	E	D	V	K	3.23499
c-Abl	EMD_HUMAN_161	M	y	G	R	D	s	A	y	Q	s	I	t	H	y	R	3.19627
c-Abl	ZAP70_HUMAN_319	t	s	V	y	E	s	P	y	s	D	P	E	E	L	K	3.13972
c-Abl	CRK_HUMAN_221	G	G	P	E	P	G	P	y	A	Q	P	s	V	N	t	3.13455
c-Abl	TP63_HUMAN_149	S	V	T	A	P	S	P	y	A	Q	P	S	S	T	F	3.09332
c-Abl	LASP1_HUMAN_171	I	P	t	s	A	P	V	y	Q	Q	P	Q	Q	Q	P	3.0313
c-Abl	CAT_HUMAN_231	N	A	N	G	E	A	V	y	C	K	F	H	Y	k	T	3.02783
c-Abl	CRK_HUMAN_239	N	L	Q	N	G	P	I	y	A	R	V	I	Q	K	R	3.01531
c-Abl	ATR_HUMAN_310	F	P	F	E	A	E	A	y	R	N	I	E	P	V	y	2.96185
c-Abl	MYLK_HUMAN_1635	V	A	P	E	V	I	N	y	E	P	I	G	Y	A	T	2.77222
c-Abl	NUMA1_HUMAN_1774	V	E	s	L	E	s	L	y	F	t	P	I	P	A	R	2.76012
c-Abl	EMD_HUMAN_99	D	D	y	y	E	E	s	y	F	t	T	R	t	y	G	2.75898
c-Abl	EGFR_HUMAN_1016	D	V	V	D	A	D	E	y	L	I	P	Q	Q	G	F	2.73927
c-Abl	ATR_HUMAN_291	D	T	D	Q	L	K	L	y	E	E	P	L	S	K	L	2.72882
c-Abl	DDX5_HUMAN_593	N	G	M	N	Q	Q	A	y	A	y	P	A	T	A	A	2.58756
c-Abl	MDM2_HUMAN_276	s	D	E	D	D	E	V	y	Q	V	t	V	y	Q	A	2.54035
c-Abl	JUNB_HUMAN_188	V	y	T	N	L	S	S	y	S	P	A	S	A	S	S	2.4894
c-Abl	MDM4_HUMAN_99	V	K	D	P	s	P	L	y	D	M	L	R	K	N	L	2.44648
c-Abl	YAP1_HUMAN_407	s	G	L	s	M	S	S	y	S	V	P	R	t	P	D	2.43556
c-Abl	STK4_HUMAN_433	K	I	P	Q	D	G	D	y	E	F	L	K	s	W	t	2.39036
c-Abl	EGFR_HUMAN_1197	s	t	A	E	N	A	E	y	L	R	V	A	P	Q	S	2.38305
c-Abl	EMD_HUMAN_95	k	G	y	N	D	D	y	y	E	E	s	y	F	t	T	2.37321
c-Abl	CRKL_HUMAN_207	I	P	E	P	A	H	A	y	A	Q	P	Q	t	t	t	2.21063
c-Abl	HDAC2_HUMAN_222	I	G	A	G	K	G	K	y	Y	A	V	N	F	P	M	2.16895
c-Abl	EMD_HUMAN_74	t	R	G	D	A	D	M	y	D	L	P	K	k	E	D	2.10116
c-Abl	EMD_HUMAN_167	A	y	Q	s	I	t	H	y	R	P	V	s	A	s	R	2.07195
c-Abl	ESR2_HUMAN_36	S	I	Y	I	P	S	S	y	V	D	S	H	H	E	Y	1.9163
c-Abl	PARK2_HUMAN_143	s	P	A	G	R	S	I	y	N	S	F	Y	V	Y	C	1.67127
c-Abl	MYLK_HUMAN_611	K	S	S	R	k	S	E	y	L	L	P	V	A	P	S	1.62703
c-Abl	ROBO1_HUMAN_1038	M	L	P	E	S	T	V	y	G	D	V	D	L	S	N	1.5267
c-Abl	EMD_HUMAN_94	s	k	G	y	N	D	D	y	y	E	E	s	y	F	t	1.30677
c-Abl	MYC_HUMAN_74	s	G	L	C	s	P	S	y	V	A	V	t	P	F	s	1.08572
c-Abl	HRAS_HUMAN_137	A	Q	D	L	A	R	S	y	G	I	P	Y	I	E	t	1.07527
c-Abl	ESR1_HUMAN_52	D	s	s	K	P	A	V	y	N	Y	P	E	G	A	A	1.05969
c-Abl	MYLK_HUMAN_1449	E	K	E	P	E	V	D	y	R	T	V	T	I	N	T	0.875576
c-Abl	LGALS3_HUMAN_107	A	Y	P	A	T	G	P	y	G	A	P	A	G	P	L	0.745114
c-Abl	MET_HUMAN_1356	y	V	H	V	N	A	t	y	V	N	V	K	C	V	A	0.596583
c-Abl	PSMA7_HUMAN_106	E	D	P	V	T	V	E	y	I	T	R	Y	I	A	S	0.503085
c-Abl	PDK1_HUMAN_243	A	R	R	L	C	D	L	y	y	I	N	S	P	E	L	0.477897
c-Abl	MYLK_HUMAN_231	N	Q	D	D	V	G	V	y	T	C	L	V	V	N	G	0.475901
c-Abl	MDM4_HUMAN_55	T	V	K	E	V	M	H	y	L	G	Q	Y	I	M	V	0.454086
c-Abl	EMD_HUMAN_85	K	k	E	D	A	L	L	y	Q	s	k	G	y	N	D	0.45012
c-Abl	RAD9A_HUMAN_28	S	R	I	G	D	E	L	y	L	E	P	L	E	D	G	0.374645
c-Abl	MET_HUMAN_1349	s	t	F	I	G	E	H	y	V	H	V	N	A	t	y	0.364175
c-Abl	EMD_HUMAN_105	s	y	F	t	T	R	t	y	G	E	P	E	s	A	G	0.303435
c-Abl	CDC73_HUMAN_315	K	I	D	T	M	G	T	y	H	G	M	T	L	K	S	0.270487
c-Abl	BCR_HUMAN_177	A	D	A	E	K	P	F	y	V	N	V	E	F	H	H	0.230591
c-Abl	EMD_HUMAN_155	K	D	R	E	R	P	M	y	G	R	D	s	A	y	Q	0.219148
c-Abl	PLCG1_HUMAN_1003	K	G	K	K	F	L	Q	y	N	R	L	Q	L	S	R	0.215257
c-Abl	TBX21_HUMAN_266	V	L	Q	s	L	H	K	y	Q	P	R	L	H	I	V	0.200835
c-Abl	ABL2_HUMAN_261	G	L	V	T	T	L	H	y	P	A	P	K	C	N	K	0.199007
c-Abl	CDC73_HUMAN_293	I	P	A	A	y	N	R	y	D	Q	E	R	F	K	G	0.182084
c-Abl	ERCC6_HUMAN_932	G	A	N	R	V	V	I	y	D	P	D	W	N	P	S	0.173272
c-Abl	TP63_HUMAN_171	A	I	P	S	N	T	D	y	P	G	P	H	S	F	D	0.169565
c-Abl	LGALS3_HUMAN_79	G	A	P	A	P	G	V	y	P	G	P	P	S	G	P	0.168603
c-Abl	MYC_HUMAN_32	C	D	E	E	E	N	F	y	Q	Q	Q	Q	Q	S	E	0.166991
c-Abl	CDC73_HUMAN_290	k	Q	P	I	P	A	A	y	N	R	y	D	Q	E	R	0.163817
c-Abl	STK3_HUMAN_81	M	Q	Q	C	D	S	P	y	V	V	K	Y	Y	G	S	0.15754
c-Abl	TOP1_HUMAN_268	A	k	M	L	D	H	E	y	T	T	K	E	I	F	R	0.15581
c-Abl	LGALS3_HUMAN_118	A	G	P	L	I	V	P	y	N	L	P	L	P	G	G	0.151174
c-Abl	PLEKHG2_HUMAN_489	s	E	P	V	K	D	P	y	V	M	F	P	Q	N	A	0.150983
c-Abl	NFKBIA_HUMAN_305	F	t	E	D	E	L	P	y	D	D	C	V	F	G	G	0.147032
c-Abl	TBX21_HUMAN_220	S	M	P	G	N	R	L	y	V	H	P	D	S	P	N	0.141636
c-Abl	CAT_HUMAN_386	y	R	A	R	V	A	N	y	Q	R	D	G	P	M	C	0.139633
c-Abl	MYLK_HUMAN_846	D	G	G	G	S	D	R	y	G	S	L	R	P	G	W	0.137715
c-Abl	EMD_HUMAN_59	s	s	s	A	A	s	s	y	s	F	s	D	L	N	s	0.137602
c-Abl	GPX1_HUMAN_98	E	I	L	N	S	L	K	y	V	R	P	G	G	G	F	0.118737
c-Abl	ANXA1_HUMAN_21	I	E	N	E	E	Q	E	y	V	Q	T	V	k	s	s	0.118309
c-Abl	EGFR_HUMAN_1092	t	F	L	P	V	P	E	y	I	N	Q	s	V	P	K	0.111625
c-Abl	RAD52_HUMAN_104	D	L	N	N	G	K	F	y	V	G	V	C	A	F	V	0.107597
c-Abl	EMD_HUMAN_41	y	E	K	K	I	F	E	y	E	T	Q	R	R	R	L	0.104558
ZAP-70	THEMIS_HUMAN_541	E	I	T	E	E	Q	y	y	M	M	R	R	Y	E	S	5.04502
ZAP-70	ZAP70_HUMAN_315	M	P	M	D	t	s	V	y	E	s	P	y	s	D	P	5.01694
ZAP-70	LAT_HUMAN_156	A	D	E	D	E	D	D	y	H	N	P	G	y	L	V	4.95383
ZAP-70	LCP2_HUMAN_113	s	s	F	E	E	D	D	y	E	S	P	N	D	D	Q	4.66462
ZAP-70	LAT_HUMAN_200	S	M	E	S	I	D	D	y	V	N	V	P	E	S	G	4.56182
ZAP-70	LAT_HUMAN_255	E	E	E	G	A	P	D	y	E	N	L	Q	E	L	N	4.53098
ZAP-70	THEMIS_HUMAN_540	E	E	I	T	E	E	Q	y	y	M	M	R	R	Y	E	4.08543
ZAP-70	LAT_HUMAN_161	D	D	y	H	N	P	G	y	L	V	V	L	P	D	S	4.01212
ZAP-70	ZAP70_HUMAN_319	t	s	V	y	E	s	P	y	s	D	P	E	E	L	K	3.98716
ZAP-70	GAB2_HUMAN_614	K	S	T	G	s	V	D	y	L	A	L	D	F	Q	P	2.67583
ZAP-70	LAT_HUMAN_220	S	L	D	G	S	R	E	y	V	N	V	S	Q	E	L	0.949267
ZAP-70	ZAP70_HUMAN_492	A	L	G	A	D	D	s	y	y	t	A	R	s	A	G	0.542172
ZAP-70	LCP2_HUMAN_128	D	G	E	D	D	G	D	y	E	s	P	N	E	E	E	0.441333
ZAP-70	DUSP3_HUMAN_138	S	P	T	L	V	I	A	y	L	M	M	R	Q	K	M	0.251717
ZAP-70	DUSP3_HUMAN_38	N	E	V	T	P	R	I	y	V	G	N	A	S	V	A	0.186804
ZAP-70	ZAP70_HUMAN_292	D	t	L	N	s	D	G	y	t	P	E	P	A	R	I	0.166666
c-Src	ITGB7_HUMAN_758	E	I	y	D	R	R	E	y	S	R	F	E	k	E	Q	4.62184
c-Src	ADRBK1_HUMAN_86	A	R	P	L	V	E	F	y	E	E	I	K	K	y	E	4.51328
c-Src	LRP1_HUMAN_4507	T	N	F	T	N	P	V	y	A	T	L	y	M	G	G	4.49003
c-Src	DDR2_HUMAN_471	E	Q	G	s	N	s	t	y	D	R	I	F	P	L	R	3.97293
c-Src	FHIT_HUMAN_114	F	H	R	N	D	S	I	y	E	E	L	Q	K	H	D	3.93524
c-Src	PTPRJ_HUMAN_1311	D	S	K	V	D	L	I	y	Q	N	t	T	A	M	t	3.83511
c-Src	KCNB1_HUMAN_128	Y	W	G	I	D	E	I	y	L	E	S	C	C	Q	A	3.79225
c-Src	NOS2_HUMAN_151	I	E	F	V	N	Q	Y	y	G	S	F	K	E	A	K	3.77684
c-Src	CYP19A1_HUMAN_361	K	V	M	E	N	F	I	y	E	S	M	R	Y	Q	P	3.76308
c-Src	SH3GLB1_HUMAN_80	A	R	I	E	E	F	V	y	E	k	L	D	R	K	A	3.75472
c-Src	MDM2_HUMAN_281	E	V	y	Q	V	t	V	y	Q	A	G	E	s	D	t	3.74969
c-Src	TLR3_HUMAN_759	E	Q	F	E	Y	A	A	y	I	I	H	A	Y	K	D	3.71846
c-Src	CDK1_HUMAN_15	E	k	I	G	E	G	t	y	G	V	V	y	k	G	R	3.67018
c-Src	HSP90AB1_HUMAN_301	D	D	I	t	Q	E	E	y	G	E	F	y	k	s	L	3.66365
c-Src	GAB1_HUMAN_242	F	F	Q	Q	Q	M	I	y	D	s	P	P	S	R	A	3.64237
c-Src	EMD_HUMAN_94	s	k	G	y	N	D	D	y	y	E	E	s	y	F	t	3.62554
c-Src	CASP8_HUMAN_380	t	D	s	E	E	Q	P	y	L	E	M	D	L	S	s	3.61164
c-Src	MPZL1_HUMAN_241	s	H	Q	G	P	V	I	y	A	Q	L	D	H	s	G	3.5932
c-Src	PTPRJ_HUMAN_1320	N	t	T	A	M	t	I	y	E	N	L	A	P	V	T	3.59025
c-Src	CHRNA7_HUMAN_386	A	S	N	G	N	L	L	y	I	G	F	R	G	L	D	3.56633
c-Src	SPTAN1_HUMAN_1073	M	K	Q	V	E	E	L	y	H	s	L	L	E	L	G	3.55891
c-Src	GTF2I_HUMAN_249	E	S	E	D	P	D	y	y	Q	Y	N	I	Q	A	G	3.53201
c-Src	VIL1_HUMAN_81	E	Q	G	A	A	A	I	y	T	T	Q	M	D	D	F	3.50342
c-Src	MPZL1_HUMAN_263	N	k	s	E	s	V	V	y	A	D	I	R	K	N	_	3.49736
c-Src	CDCP1_HUMAN_743	V	I	E	D	T	M	V	y	G	H	L	L	Q	D	S	3.45154
c-Src	STAP2_HUMAN_22	G	V	L	P	S	H	Y	y	E	S	F	L	E	K	K	3.44568
c-Src	PDPK1_HUMAN_376	D	E	D	C	y	G	N	y	D	N	L	L	S	Q	F	3.41858
c-Src	PROM1_HUMAN_852	G	Y	H	K	D	H	V	y	G	I	H	N	P	V	M	3.36987
c-Src	ARHGAP5_HUMAN_1109	K	G	y	s	D	E	I	y	V	V	P	D	D	s	Q	3.36438
c-Src	DAPP1_HUMAN_139	k	V	E	E	P	s	I	y	E	s	V	R	V	H	T	3.35816
c-Src	EMD_HUMAN_99	D	D	y	y	E	E	s	y	F	t	T	R	t	y	G	3.35709
c-Src	SRC_HUMAN_338	V	V	S	E	E	P	I	y	I	V	T	E	Y	M	S	3.32016
c-Src	VAV3_HUMAN_173	E	D	E	G	G	E	V	y	E	D	L	M	K	A	E	3.29035
c-Src	NPHP1_HUMAN_721	F	D	L	S	E	Q	T	y	D	F	L	G	E	M	R	3.25653
c-Src	PDPK1_HUMAN_373	s	E	D	D	E	D	C	y	G	N	y	D	N	L	L	3.24305
c-Src	EMD_HUMAN_95	k	G	y	N	D	D	y	y	E	E	s	y	F	t	T	3.23838
c-Src	PLCG2_HUMAN_753	E	R	D	I	N	S	L	y	D	V	s	R	M	y	V	3.23783
c-Src	PKD1_HUMAN_4237	N	Q	A	T	E	D	V	y	Q	L	E	Q	Q	L	H	3.23325
c-Src	FIP1L1_HUMAN_110	I	K	T	G	A	P	Q	y	G	s	y	G	T	A	P	3.22252
c-Src	GUCY1B3_HUMAN_192	E	S	K	E	E	D	F	y	E	D	L	D	R	F	E	3.199
c-Src	WNK4_HUMAN_1164	K	K	E	I	E	D	L	y	S	R	L	G	K	Q	P	3.17644
c-Src	PTEN_HUMAN_155	A	Q	E	A	L	D	F	y	G	E	V	R	T	R	D	3.16908
c-Src	GTF2I_HUMAN_248	E	E	S	E	D	P	D	y	y	Q	y	N	I	Q	G	3.15833
c-Src	GTF2I_HUMAN_248	E	E	S	E	D	P	D	y	y	Q	Y	N	I	Q	A	3.15833
c-Src	CDH2_HUMAN_884	S	S	G	G	E	Q	D	y	D	y	L	N	D	W	G	3.13329
c-Src	CDH2_HUMAN_886	G	G	E	Q	D	y	D	y	L	N	D	W	G	P	R	3.10979
c-Src	GRB10_HUMAN_67	N	A	S	L	E	S	L	y	S	A	C	S	M	Q	S	3.0245
c-Src	HNF4A_HUMAN_23	S	A	A	L	D	P	A	y	T	T	L	E	F	E	N	3.00974
c-Src	FXN_HUMAN_118	E	D	L	A	D	K	P	y	T	F	E	D	Y	D	V	2.97407
c-Src	KCNA3_HUMAN_187	F	S	E	E	I	R	F	y	Q	L	G	E	E	A	M	2.94073
c-Src	CDCP1_HUMAN_734	K	D	N	D	s	H	V	y	A	V	I	E	D	T	M	2.87183
c-Src	PTK2_HUMAN_441	G	D	V	H	Q	G	I	y	M	s	P	E	N	P	A	2.86124
c-Src	TFG_HUMAN_247	E	G	Q	M	Y	Q	Q	y	Q	Q	Q	A	G	Y	G	2.85908
c-Src	PLEKHG2_HUMAN_489	s	E	P	V	K	D	P	y	V	M	F	P	Q	N	A	2.85666
c-Src	DDR2_HUMAN_736	F	G	M	S	R	N	L	y	s	G	D	y	y	R	I	2.82518
c-Src	ELMO1_HUMAN_720	I	P	K	E	P	s	N	y	D	F	V	y	D	C	N	2.76115
c-Src	AFAP1_HUMAN_451	T	D	P	E	A	L	H	y	D	y	I	D	V	E	M	2.73561
c-Src	TFG_HUMAN_33	I	H	N	E	D	I	T	y	D	E	L	V	L	M	M	2.73106
c-Src	TGFBR2_HUMAN_284	K	I	F	P	Y	E	E	y	A	S	W	K	T	E	K	2.59362
c-Src	CORO7_HUMAN_758	G	D	T	R	V	F	L	y	E	L	L	P	E	s	P	2.58755
c-Src	G6PD_HUMAN_507	G	F	Q	y	E	G	t	y	K	W	V	N	P	H	k	2.44357
c-Src	RAF1_HUMAN_341	G	Q	R	D	s	s	y	y	W	E	I	E	A	S	E	2.4404
c-Src	GAB1_HUMAN_259	A	s	V	D	s	s	L	y	N	L	P	R	S	y	s	2.41239
c-Src	RPS6KA3_HUMAN_488	D	V	y	D	D	G	K	y	V	Y	V	V	T	E	L	2.34571
c-Src	AP2B1_HUMAN_737	T	H	R	Q	G	H	I	y	M	E	M	N	F	T	N	2.34335
c-Src	CDK4_HUMAN_17	A	E	I	G	V	G	A	y	G	T	V	Y	k	A	R	2.3399
c-Src	DVL2_HUMAN_463	S	D	V	V	D	W	L	y	H	H	V	E	G	F	P	2.31292
c-Src	ARAF_HUMAN_302	G	y	R	D	s	G	y	y	W	E	V	P	P	S	E	2.30052
c-Src	HNRNPK_HUMAN_236	F	y	D	E	T	y	D	y	G	G	F	T	M	M	F	2.2904
c-Src	SRRT_HUMAN_92	D	E	H	S	S	D	P	y	H	S	G	Y	E	M	P	2.27834
c-Src	LRP1_HUMAN_4473	V	E	I	G	N	P	T	y	K	M	Y	E	G	G	E	2.12192
c-Src	CNKSR1_HUMAN_665	K	E	Q	N	R	E	L	y	S	E	G	L	G	A	W	2.09937
c-Src	KHSRP_HUMAN_583	W	A	A	Y	Y	S	H	y	Y	Q	Q	P	P	G	P	2.00002
c-Src	RET_HUMAN_905	D	V	y	E	E	D	s	y	V	K	R	S	Q	G	R	1.99389
c-Src	AKAP8_HUMAN_53	T	T	G	A	T	y	S	y	G	P	A	S	W	E	A	1.96986
c-Src	HCRTR1_HUMAN_358	S	A	A	N	P	I	I	y	N	F	L	S	G	K	F	1.90991
c-Src	ARHGDIA_HUMAN_156	Y	G	P	R	A	E	E	y	E	F	L	T	P	V	E	1.86685
c-Src	SDHA_HUMAN_215	S	L	R	Y	D	T	S	y	F	V	E	Y	F	A	L	1.86106
c-Src	DDR2_HUMAN_741	N	L	y	s	G	D	y	y	R	I	Q	G	R	A	V	1.82943
c-Src	RPS6KA3_HUMAN_707	K	G	A	M	A	A	t	y	s	A	L	N	R	N	Q	1.8046
c-Src	VIL1_HUMAN_64	S	L	S	y	D	I	H	y	W	I	G	Q	D	S	S	1.62183
c-Src	AKAP8_HUMAN_51	S	V	T	T	G	A	T	y	S	y	G	P	A	S	W	1.61014
c-Src	EMD_HUMAN_161	M	y	G	R	D	s	A	y	Q	s	I	t	H	y	R	1.58911
c-Src	RPS6KA3_HUMAN_483	I	I	t	L	K	D	V	y	D	D	G	K	y	V	Y	1.56886
c-Src	SHC1_HUMAN_349	E	E	P	P	D	H	Q	y	y	N	D	F	P	G	K	1.56101
c-Src	EGFR_HUMAN_727	s	G	A	F	G	t	V	y	k	G	L	W	I	P	E	1.53838
c-Src	CBLC_HUMAN_341	S	E	E	Q	L	Q	L	y	W	A	M	D	S	T	F	1.5135
c-Src	DVL2_HUMAN_18	V	G	E	t	K	V	I	y	H	L	D	E	E	E	T	1.48885
c-Src	WWOX_HUMAN_33	T	T	K	D	G	W	V	y	Y	A	N	H	T	E	E	1.48619
c-Src	OCLN_HUMAN_398	K	R	t	E	Q	D	H	y	E	t	D	y	t	t	G	1.32574
c-Src	THRAP3_HUMAN_107	N	r	G	G	Y	G	N	y	r	S	N	W	Q	N	y	1.29053
c-Src	SHC1_HUMAN_350	E	P	P	D	H	Q	y	y	N	D	F	P	G	K	E	1.24914
c-Src	FBXO5_HUMAN_142	A	L	E	T	S	R	L	y	E	D	s	G	Y	S	s	1.23581
c-Src	CACNA1C_HUMAN_2217	E	L	Q	D	S	R	V	y	V	S	S	L	_	_	_	1.21328
c-Src	AFAP1_HUMAN_94	S	S	L	P	E	G	y	y	E	E	A	V	P	L	s	1.17926
c-Src	PTEN_HUMAN_174	T	I	P	S	Q	R	R	y	V	y	y	y	s	y	L	1.0225
c-Src	KHSRP_HUMAN_317	G	F	G	D	R	N	E	y	G	s	R	I	G	G	G	0.966846
c-Src	SF3B2_HUMAN_379	V	t	E	E	P	E	I	y	E	P	N	F	I	F	F	0.951367
c-Src	AFAP1_HUMAN_93	T	S	S	L	P	E	G	y	y	E	E	A	V	P	L	0.947242
c-Src	ADRBK1_HUMAN_92	F	y	E	E	I	K	K	y	E	K	L	E	T	E	E	0.939794
c-Src	EGFR_HUMAN_764	k	E	I	L	D	E	A	y	V	M	A	s	V	D	N	0.931979
c-Src	VIL1_HUMAN_60	K	T	A	S	S	L	S	y	D	I	H	y	W	I	G	0.923266
c-Src	CDC42_HUMAN_64	D	T	A	G	Q	E	D	y	D	R	L	R	P	L	S	0.913931
c-Src	EMD_HUMAN_74	t	R	G	D	A	D	M	y	D	L	P	K	k	E	D	0.900224
c-Src	SDCBP_HUMAN_4	_	_	_	_	M	s	L	y	P	s	L	E	D	L	K	0.899536
c-Src	KHSRP_HUMAN_688	y	Y	R	Q	Q	A	A	y	Y	G	Q	t	P	G	P	0.888085
c-Src	NCKIPSD_HUMAN_227	S	T	S	L	D	T	L	y	T	S	S	S	P	S	E	0.850505
c-Src	CAV1_HUMAN_14	V	D	s	E	G	H	L	y	t	V	P	I	R	E	Q	0.786852
c-Src	KCNA3_HUMAN_499	E	G	E	E	Q	S	Q	y	M	H	V	G	s	C	Q	0.784372
c-Src	CDH2_HUMAN_852	N	D	P	T	A	P	P	y	D	S	L	L	V	F	D	0.661668
c-Src	SF3B2_HUMAN_592	T	I	H	G	D	L	y	y	E	G	K	E	F	E	T	0.661019
c-Src	KCND3_HUMAN_108	G	K	L	H	Y	P	R	y	E	C	I	S	A	Y	D	0.634395
c-Src	ARHGDIB_HUMAN_153	y	G	P	R	P	E	E	y	E	F	L	t	P	V	E	0.605941
c-Src	DVL2_HUMAN_275	V	T	L	N	M	E	K	y	N	F	L	G	I	S	I	0.561627
c-Src	FUBP1_HUMAN_268	F	R	E	V	R	N	E	y	G	s	R	I	G	G	N	0.547266
c-Src	GJA1_HUMAN_265	k	D	C	G	s	Q	k	y	A	y	F	N	G	C	s	0.506142
c-Src	DVL2_HUMAN_295	E	R	G	D	G	G	I	y	I	G	S	I	M	k	G	0.481644
c-Src	FCRL3_HUMAN_722	E	E	D	D	E	E	N	y	E	N	V	P	R	V	L	0.463775
c-Src	HRAS_HUMAN_64	D	T	A	G	Q	E	E	y	S	A	M	R	D	Q	Y	0.445408
c-Src	SRRT_HUMAN_836	Y	G	A	G	r	G	N	y	D	A	F	r	G	Q	G	0.414273
c-Src	ESR1_HUMAN_537	C	K	N	V	V	P	L	y	D	L	L	L	E	M	L	0.413585
c-Src	CORO7_HUMAN_288	G	E	R	Q	L	Y	C	y	E	V	V	P	Q	Q	P	0.411162
c-Src	SDC4_HUMAN_180	K	K	K	D	E	G	s	y	D	L	G	K	K	P	I	0.403836
c-Src	MYLK_HUMAN_471	y	E	D	A	G	s	H	y	L	C	L	L	K	A	R	0.365081
c-Src	FUBP1_HUMAN_58	T	s	L	N	s	N	D	y	G	y	G	G	Q	k	R	0.361119
c-Src	CHN2_HUMAN_21	V	S	S	D	A	E	E	y	Q	P	P	I	W	K	S	0.351033
c-Src	ITGB7_HUMAN_753	Y	R	L	S	V	E	I	y	D	R	R	E	y	S	R	0.345002
c-Src	AGTR1_HUMAN_319	Y	F	L	Q	L	L	K	y	I	P	P	K	A	K	S	0.33923
c-Src	RPS6KA3_HUMAN_644	K	F	S	L	S	G	G	y	W	N	S	V	S	D	T	0.296314
c-Src	HNF4A_HUMAN_288	I	D	D	N	E	y	A	y	L	K	A	I	I	F	F	0.288585
c-Src	EGFR_HUMAN_1016	D	V	V	D	A	D	E	y	L	I	P	Q	Q	G	F	0.279339
c-Src	EMD_HUMAN_85	K	k	E	D	A	L	L	y	Q	s	k	G	y	N	D	0.278434
c-Src	PTK2_HUMAN_1007	k	M	K	L	A	Q	Q	y	V	M	T	S	L	Q	Q	0.270869
c-Src	AKAP8_HUMAN_539	I	V	k	M	L	E	k	y	L	K	G	E	D	P	F	0.259182
c-Src	L1CAM_HUMAN_1176	K	D	E	t	F	G	E	y	R	S	L	E	s	D	N	0.254754
c-Src	HIPK2_HUMAN_361	S	K	A	V	C	s	t	y	L	Q	s	R	y	y	R	0.250024
c-Src	GRIN2A_HUMAN_1423	S	R	G	H	N	D	V	y	I	S	E	H	V	M	P	0.241043
c-Src	WBP2_HUMAN_231	A	E	A	A	A	S	A	y	y	N	P	G	N	P	H	0.232613
c-Src	CHRNA7_HUMAN_442	K	I	L	E	E	V	R	y	I	A	N	R	F	R	C	0.229901
c-Src	FUBP1_HUMAN_625	y	y	R	Q	Q	A	A	y	y	A	Q	t	s	P	Q	0.225623
c-Src	RGS16_HUMAN_168	T	L	M	E	K	D	S	y	P	R	F	L	K	S	P	0.223021
c-Src	HNRNPK_HUMAN_225	I	k	G	R	A	Q	P	y	D	P	N	F	y	D	E	0.222949
c-Src	EMD_HUMAN_41	y	E	K	K	I	F	E	y	E	T	Q	R	R	R	L	0.222314
c-Src	IKBKB_HUMAN_199	E	L	L	E	Q	Q	K	y	T	V	T	V	D	Y	W	0.2201
c-Src	PTEN_HUMAN_46	A	E	R	L	E	G	V	y	R	N	N	I	D	D	V	0.21936
c-Src	VAMP7_HUMAN_45	S	E	N	N	K	L	T	y	S	H	G	N	Y	L	F	0.218787
c-Src	AKAP8_HUMAN_146	C	L	P	E	H	N	P	y	R	P	s	y	S	y	D	0.217897
c-Src	AKAP8_HUMAN_436	T	V	E	F	L	Q	E	y	I	V	N	R	N	K	K	0.212353
c-Src	EMD_HUMAN_167	A	y	Q	s	I	t	H	y	R	P	V	s	A	s	R	0.209137
c-Src	THRB_HUMAN_406	F	L	L	A	F	E	H	y	I	N	Y	R	K	H	H	0.208316
c-Src	FLOT1_HUMAN_56	N	V	k	S	E	K	V	y	T	R	H	G	V	P	I	0.206788
c-Src	RHOU_HUMAN_254	S	K	S	W	W	K	K	y	C	C	F	V	_	_	_	0.206436
c-Src	RPS6KA3_HUMAN_470	E	I	E	I	L	L	R	y	G	Q	H	P	N	I	I	0.200431
c-Src	BCAR1_HUMAN_128	S	K	A	Q	Q	G	L	y	Q	V	P	G	P	s	P	0.19749
c-Src	EGFR_HUMAN_1125	A	P	s	R	D	P	H	y	Q	D	P	H	s	t	A	0.1953
c-Src	PTK2_HUMAN_194	A	L	E	K	K	S	N	y	E	V	L	E	K	D	V	0.191003
c-Src	VIL1_HUMAN_46	S	F	F	D	G	D	C	y	I	I	L	A	I	H	K	0.18946
c-Src	TNS3_HUMAN_1256	k	G	C	s	N	E	P	y	F	G	s	L	t	A	L	0.18929
c-Src	ANXA1_HUMAN_21	I	E	N	E	E	Q	E	y	V	Q	T	V	k	s	s	0.187576
c-Src	G6PD_HUMAN_428	D	L	t	y	G	N	R	y	K	N	V	k	L	P	D	0.185648
c-Src	RPS6KA3_HUMAN_580	G	L	L	M	t	P	C	y	t	A	N	F	V	A	P	0.18236
c-Src	BDKRB2_HUMAN_177	G	V	R	W	A	K	L	y	s	L	V	I	W	G	C	0.17919
c-Src	ZC3H4_HUMAN_158	G	H	R	K	y	R	E	y	s	P	P	y	A	P	s	0.178434
c-Src	PLD2_HUMAN_511	F	F	W	L	G	K	D	y	S	N	L	I	T	K	D	0.177183
c-Src	GAB1_HUMAN_627	K	G	D	K	Q	V	E	y	L	D	L	D	L	D	s	0.17715
c-Src	MYH9_HUMAN_158	y	A	I	T	D	T	A	y	R	S	M	M	Q	D	R	0.169448
c-Src	ATXN2L_HUMAN_744	V	P	G	Q	Q	G	K	y	R	G	A	K	G	S	L	0.168062
c-Src	TNS3_HUMAN_1206	S	H	s	F	R	G	A	y	G	L	A	M	K	V	A	0.167656
c-Src	SHC1_HUMAN_427	E	L	F	D	D	P	s	y	V	N	V	Q	N	L	D	0.166679
c-Src	SRRT_HUMAN_175	A	V	K	R	y	N	D	y	K	L	D	F	R	R	Q	0.16579
c-Src	RPS6KB2_HUMAN_45	G	L	E	P	V	G	H	y	E	E	V	E	L	T	E	0.160034
c-Src	EMD_HUMAN_105	s	y	F	t	T	R	t	y	G	E	P	E	s	A	G	0.15966
c-Src	THRAP3_HUMAN_68	E	R	N	H	P	r	V	y	Q	N	r	D	F	r	G	0.157081
c-Src	SPRY2_HUMAN_55	A	I	R	N	T	N	E	y	t	E	G	P	T	V	V	0.155623
c-Src	KCNJ1_HUMAN_337	S	K	T	K	E	G	K	y	R	V	D	F	H	N	F	0.154748
c-Src	FLOT1_HUMAN_149	M	G	I	S	V	V	S	y	T	L	K	D	I	H	D	0.154521
c-Src	PDHA1_HUMAN_289	M	E	L	Q	T	Y	R	y	H	G	H	s	M	s	D	0.154059
c-Src	RRAS_HUMAN_66	D	P	T	I	E	D	S	y	T	K	I	C	S	V	D	0.149962
c-Src	IKBKB_HUMAN_188	s	F	V	G	T	L	Q	y	L	A	P	E	L	L	E	0.14965
c-Src	CDH2_HUMAN_860	D	S	L	L	V	F	D	y	E	G	S	G	S	T	A	0.149466
c-Src	GRIN2A_HUMAN_1184	G	L	s	N	N	D	Q	y	K	L	y	S	K	H	F	0.146368
c-Src	AKAP8_HUMAN_170	N	G	s	F	G	G	Q	y	S	E	C	R	D	P	A	0.146115
c-Src	SFPQ_HUMAN_691	G	P	G	t	P	A	G	y	G	r	G	r	E	E	y	0.145637
c-Src	HRAS_HUMAN_96	S	F	E	D	I	H	Q	y	R	E	Q	I	K	R	V	0.145331
c-Src	MMP14_HUMAN_573	G	t	P	R	R	L	L	y	C	Q	R	s	L	L	D	0.145222
c-Src	CTTN_HUMAN_334	V	T	Q	V	s	s	A	y	Q	k	T	V	P	V	E	0.143514
c-Src	STAP2_HUMAN_322	G	D	G	P	A	V	D	y	E	N	Q	D	V	A	S	0.142544
c-Src	EMD_HUMAN_182	s	s	L	D	L	s	y	y	P	T	S	S	S	T	s	0.141703
c-Src	PTEN_HUMAN_377	s	D	N	E	P	D	H	y	R	Y	s	D	t	t	D	0.137899
c-Src	THRAP3_HUMAN_118	W	Q	N	y	R	Q	A	y	s	P	R	R	G	R	S	0.137293
c-Src	WBP2_HUMAN_192	M	M	D	G	A	M	G	y	V	Q	P	P	P	P	P	0.136897
c-Src	HNRNPK_HUMAN_72	I	K	A	L	R	T	D	y	N	A	s	V	s	V	P	0.13615
c-Src	BCLAF1_HUMAN_93	G	r	y	H	r	G	G	y	r	P	V	W	N	R	R	0.136133
c-Src	CDH5_HUMAN_658	G	E	M	D	T	T	S	y	D	V	S	V	L	N	s	0.135951
c-Src	BCLAF1_HUMAN_408	D	t	E	E	t	E	D	y	R	Q	F	R	K	s	V	0.134864
c-Src	DGKA_HUMAN_335	I	L	P	P	S	S	I	y	P	S	V	L	A	S	G	0.133769
c-Src	SH3PXD2B_HUMAN_508	D	M	S	A	S	A	G	y	E	E	I	s	D	P	D	0.133596
c-Src	GAB1_HUMAN_373	A	s	D	t	D	s	s	y	C	I	P	T	A	G	M	0.133403
c-Src	FERMT2_HUMAN_193	s	K	T	M	T	P	t	y	D	A	H	D	G	s	P	0.132785
c-Src	ARHGDIA_HUMAN_27	E	D	E	H	s	V	N	y	k	P	P	A	Q	K	s	0.132304
c-Src	FAM82A2_HUMAN_176	D	A	E	S	E	G	G	y	t	T	A	N	A	E	s	0.132162
c-Src	AFAP1_HUMAN_125	M	S	S	S	Y	E	S	y	D	E	E	E	E	D	G	0.131276
c-Src	SRC_HUMAN_530	F	T	s	t	E	P	Q	y	Q	P	G	E	N	L	_	0.130528
c-Src	HLA-A_HUMAN_344	s	D	R	k	G	G	s	y	s	Q	A	A	s	s	D	0.130418
c-Src	AKAP8_HUMAN_311	K	R	K	Q	F	Q	L	y	E	E	P	D	T	K	L	0.127039
c-Src	ADRBK1_HUMAN_13	A	V	L	A	D	V	S	y	L	M	A	M	E	K	S	0.124962
c-Src	HLA-B_HUMAN_344	S	G	G	k	G	G	S	y	S	Q	A	A	C	s	D	0.122965
c-Src	EMD_HUMAN_59	s	s	s	A	A	s	s	y	s	F	s	D	L	N	s	0.12196
c-Src	MUC1_HUMAN_1229	s	s	t	D	R	s	P	y	E	K	V	s	A	G	N	0.113259
c-Src	THRAP3_HUMAN_344	A	A	s	G	G	A	A	y	t	K	R	y	L	E	E	0.108645
c-Src	TRPV1_HUMAN_200	A	S	Y	t	D	S	Y	y	K	G	Q	T	A	L	H	0.106773
c-Src	BCLAF1_HUMAN_150	S	S	R	S	S	s	P	y	s	k	s	P	V	s	K	0.106535
c-Src	G3BP1_HUMAN_133	V	H	N	D	I	F	R	y	Q	D	E	V	F	G	G	0.105769
c-Src	GIT1_HUMAN_321	F	L	P	V	N	P	E	y	S	A	T	R	N	Q	G	0.0977833
c-Src	PELP1_HUMAN_920	E	E	E	D	E	E	E	y	F	E	E	E	E	E	E	0.094856
c-Src	CBL_HUMAN_774	s	E	N	E	D	D	G	y	D	V	P	K	P	P	V	0.0867566
c-Src	STAT1_HUMAN_701	D	G	P	K	G	t	G	y	I	k	t	E	L	I	s	0.0787627
Lck	DAPP1_HUMAN_139	k	V	E	E	P	s	I	y	E	s	V	R	V	H	T	4.33205
Lck	CHN2_HUMAN_153	K	M	T	T	N	P	I	y	E	H	I	G	y	A	t	4.27522
Lck	PLCG2_HUMAN_753	E	R	D	I	N	S	L	y	D	V	s	R	M	y	V	3.87339
Lck	ZAP70_HUMAN_315	M	P	M	D	t	s	V	y	E	s	P	y	s	D	P	3.87072
Lck	VAV1_HUMAN_142	S	V	G	D	E	D	I	y	S	G	L	S	D	Q	I	3.80811
Lck	SSBP3_HUMAN_25	E	k	L	A	L	y	V	y	E	Y	L	L	H	V	G	3.70403
Lck	G3BP1_HUMAN_56	G	k	P	A	D	A	V	y	G	Q	k	E	I	H	R	3.64827
Lck	THEMIS_HUMAN_541	E	I	T	E	E	Q	y	y	M	M	R	R	Y	E	S	3.57391
Lck	SSBP3_HUMAN_23	A	R	E	k	L	A	L	y	V	y	E	Y	L	L	H	3.46629
Lck	ZAP70_HUMAN_319	t	s	V	y	E	s	P	y	s	D	P	E	E	L	K	3.40863
Lck	CD33_HUMAN_340	E	M	D	E	E	L	H	y	A	S	L	N	F	H	G	3.23286
Lck	THEMIS_HUMAN_540	E	E	I	T	E	E	Q	y	y	M	M	R	R	Y	E	3.13153
Lck	VAV1_HUMAN_174	E	A	E	G	D	E	I	y	E	D	L	M	R	s	E	3.09301
Lck	FOXP3_HUMAN_342	N	M	R	P	P	F	T	y	A	T	L	I	R	W	A	2.9323
Lck	ZAP70_HUMAN_492	A	L	G	A	D	D	s	y	y	t	A	R	s	A	G	2.49207
Lck	IL2RB_HUMAN_384	A	C	Q	V	y	F	T	y	D	P	y	S	E	E	D	2.06277
Lck	IL2RB_HUMAN_381	E	I	E	A	C	Q	V	y	F	T	y	D	P	y	S	1.84722
Lck	IL2RB_HUMAN_387	V	y	F	T	y	D	P	y	S	E	E	D	P	D	E	1.80022
Lck	CBL_HUMAN_700	E	G	E	E	D	t	E	y	M	t	P	s	s	R	P	1.63751
Lck	VAV1_HUMAN_160	V	E	E	D	E	D	L	y	D	C	V	E	N	E	E	1.60479
Lck	CD5_HUMAN_453	A	s	H	V	D	N	E	y	s	Q	P	P	R	N	s	1.56079
Lck	ESR1_HUMAN_537	C	K	N	V	V	P	L	y	D	L	L	L	E	M	L	1.47879
Lck	ZAP70_HUMAN_69	E	R	Q	L	N	G	T	y	A	I	A	G	G	k	A	0.542438
Lck	ZAP70_HUMAN_474	V	L	L	V	N	R	H	y	A	k	I	S	D	F	G	0.222094
Lck	LCP2_HUMAN_128	D	G	E	D	D	G	D	y	E	s	P	N	E	E	E	0.167761
Lck	LCK_HUMAN_505	F	T	A	t	E	G	Q	y	Q	P	Q	P	_	_	_	0.162271
Lck	PRDX1_HUMAN_194	D	V	Q	k	S	k	E	y	F	s	k	Q	K	_	_	0.161823
Lck	SOCS3_HUMAN_221	I	R	E	F	L	D	Q	y	D	A	P	L	_	_	_	0.158361
Lck	MED28_HUMAN_64	A	S	L	V	S	Q	D	y	V	N	G	T	D	Q	E	0.150773
Lck	ZAP70_HUMAN_178	E	E	A	E	R	k	L	y	s	G	A	Q	T	D	G	0.136754
Lck	LCP2_HUMAN_113	s	s	F	E	E	D	D	y	E	S	P	N	D	D	Q	0.136467
Lck	ZAP70_HUMAN_292	D	t	L	N	s	D	G	y	t	P	E	P	A	R	I	0.133173
Lck	STAT2_HUMAN_690	N	L	Q	E	R	R	K	y	L	K	H	R	L	I	V	0.129149
Lck	SH2D2A_HUMAN_305	G	E	A	P	s	N	I	y	V	E	V	E	D	E	G	0.128991
Lck	DGKA_HUMAN_335	I	L	P	P	S	S	I	y	P	S	V	L	A	S	G	0.122226
Lck	CBL_HUMAN_774	s	E	N	E	D	D	G	y	D	V	P	K	P	P	V	0.111936
Lck	CD5_HUMAN_487	D	N	s	s	D	s	D	y	D	L	H	G	A	Q	R	0.0973512
